# Supplementary material for: Lipids and Trehalose Actively Cooperate in Heat Stress Management of Schizosaccharomyces pombe
Source: Int J Mol Sci. 2021 Dec 9;22(24):13272. doi: 10.3390/ijms222413272 (PMC8707580; doi:10.3390/ijms222413272)
Supplement: Supplementary file 1 [file ijms-22-13272-s001.zip › ijms-1479206-supplementary/SupplementaryTables_Proof.xlsx]

## Sheet: S1_Lag
Table S1. Lag phase length and growth rate following HS at 40 °C
Strain	Growth parameter	HS at 40 °C												p value
		0 min		20 min		40 min		60 min		120 min		180 min		0 vs 20 min	0 vs 40 min	0 vs 60 min	0 vs 120 min	0 vs 180 min	WT vs mutant
		mean	SD	mean	SD	mean	SD	mean	SD	mean	SD	mean	SD						0 min	20 min	40 min	60 min	120 min	180 min
WT	μ	0.137754	0.00918879	0.177478	0.00740132	0.173348	0.012223	0.2791	0.0278392	0.190361	0.014727	0.23265	0.0176299	0.00430876	0.0157116	0.0011241	0.0063004	0.00116797
	λ	0.643893	0.438714	1.38657	0.320301	1.94036	0.212883	3.46526	0.708567	4.52508	0.447172	4.77937	0.335479	0.0769781	0.00999354	0.00422299	0.000427414	0.000203907
tps1Δ	μ	0.145042	0.00548854	0.170228	0.0314105	0.104418	0.010017	0.121094	0.0254694	0.141884	0.027567	0.126296	0.0603379	0.243097	0.00352426	0.186585	0.855211	0.620426	0.303579	0.717009	0.00164496	0.00191838	0.0548569	0.042794
	λ	0.444083	0.28315	1.56866	0.470843	4.83497	0.907757	7.93882	1.00089	10.0503	0.934974	10.7657	1.32513	0.023901	0.00132516	0.000237102	6.96943e-05	0.000190672	0.543704	0.290402	0.00577949	0.00320959	0.000764563	0.00162016
ntp1Δ	μ	0.148273	0.0133743	0.133708	0.0149843	0.121503	0.0198627	0.161826	0.0691412	0.161134	0.0789767	0.134249	0.00951037	0.277479	0.124905	0.75561	0.794722	0.212935	0.32435	0.0105275	0.0182978	0.0527039	0.562811	0.0010466
	λ	0.577394	0.158019	0.852177	0.204898	1.24003	0.262345	3.75738	1.46928	4.78031	2.03284	4.36091	1.58113	0.139704	0.0199898	0.0203461	0.0233704	0.0145636	0.817063	0.0716471	0.0229549	0.771916	0.842188	0.677065
Calculations were performed according to [77] and [78].
Data are expressed as mean ± SD, n= 3 (independent experiments).
Student’s t-tests were performed for pairwise multiple comparisons; significance was accepted for p < 0.05 corresponding to a false discovery rate q < 0.034. Green fill indicates p < 0.05.
μ, specific growth rate; λ, lag phase length (h).

## Sheet: S2_Tre_GPC
Table S2. Trehalose and GPC accumulation upon HS
Membrane protectant	Strain	Membrane protectant/prot (trehalose - mg/mg, GPC - nmol/mg)																		p value
		HS at 40 °C												Recovery at 30 °C (after 60 min HS at 40 °C)						HS at 40 °C					Recovery at 30 °C
		0 min		20 min		40 min		60 min		120 min		180 min		20 min		40 min		60 min		0 vs 20 min	0 vs 40 min	0 vs 60 min	60 vs 120 min	60 vs 180 min	0 vs 20 min	0 vs 40 min	0 vs 60 min
		mean	SD	mean	SD	mean	SD	mean	SD	mean	SD	mean	SD	mean	SD	mean	SD	mean	SD
Tre	WT	0.00198308	0.000520164	0.387907	0.0582104	0.472985	0.0723444	0.449869	0.0443495	0.269134	0.0476656	0.248946	0.0643849	0.176222	0.0207673	0.0188198	0.00195588	0.00266273	0.00159048	0.000328344	0.000352411	6.27345e-05	0.0086	0.0112	0.006	0	0
	tps1Δ	0.00148224	0.000512873	0.00124022	0.00109274	0.00136452	0.000341329	0.000906	0.000539979	0.000434337	4.38469e-05	0.000473259	0.000236733	0.000335906	0.0001268	0.000211581	8.65417e-05	0.000655628	0.000354432	0.745892	0.757297	0.251246	0.206054	0.272529	0.1501	0.0911	0.5379
	ntp1Δ	0.0360878	0.0184772	0.382065	0.018084	0.625322	0.0577462	0.598345	0.0436786	0.582078	0.0527607	0.574434	0.0554385	0.608599	0.0871391	0.491491	0.0605088	0.407349	0.0342996	2.05338e-05	4.28247e-05	2.02356e-05	0.657395	0.569745	0.8643	0.0682	0.004
GPC	WT	0.0219206	0.0200619	0.173098	0.0136721	0.049781	0.00497155	0.0173321	0.00431261	0.0032638	0.00786271	0.0185653	0.0129378	0.0103797	0.00607177	0.0203667	0.0187523	0.00586712	0.0117385	0.000479444	0.0767764	0.716958	0.0400407	0.861002	0.168	0.8022	0.296
	tps1Δ	0.0320185	0.015282	0.550562	0.158528	0.747425	0.131113	0.783222	0.109752	0.136427	1.03333	1.19493	0.0418237	0.352491	0.114631	0.0821585	0.0193294	0.0176699	0.0452116	0.00482696	0.000584113	0.000251446	0.0649625	0.00404746	0.0094	0.0004	0.0003
	ntp1Δ	0.0443922	0.0190087	0.270886	0.0346946	0.116761	0.0185387	0.039346	0.0216149	0.00793834	0.0151125	0.0193445	0.00573344	0.0231888	0.0153677	0.0181667	0.0101153	0.00693909	0.0169969	0.000579756	0.00920952	0.772569	0.142349	0.195549	0.3567	0.2067	0.1742
Data are expressed as mean ± SD, n= 3 (independent experiments).
Student’s t-tests were performed for pairwise multiple comparisons; significance was accepted for p < 0.05 corresponding to a false discovery rate q < 0.034. Green fill indicates p < 0.05.
Tre, trehalose; GPC, glycerophosphocholine.

## Sheet: S3_mol%
Table S3. Lipidomic dataset for lipid compositional data (mol% of membrane lipids)
	mol% of membrane lipids																																				p value
Lipid species	WT at 40 °C												tps1Δ at 40 °C												ntp1Δ at 40 °C												WT					tps1Δ					ntpΔ
	0 min		20 min		40 min		60 min		120 min		180 min		0 min		20 min		40 min		60 min		120 min		180 min		0 min		20 min		40 min		60 min		120 min		180 min		0 vs 20 min	0 vs 40 min	0 vs 60 min	0 vs 120 min	0 vs 180 min	0 vs 20 min	0 vs 40 min	0 vs 60 min	0 vs 120 min	0 vs 180 min	0 vs 20 min	0 vs 40 min	0 vs 60 min
	mean	SD	mean	SD	mean	SD	mean	SD	mean	SD	mean	SD	mean	SD	mean	SD	mean	SD	mean	SD	mean	SD	mean	SD	mean	SD	mean	SD	mean	SD	mean	SD	mean	SD	mean	SD
LPC [16:1]	0.035265	0.00412349	0.0172524	0.00480987	0.00562416	0.00262388	0.00234093	0.00121944	0.00184226	0.00235715	0.000430813	0.00074619	0.0252931	0.00090167	0.0143861	0.00334128	0.00515974	0.00246918	0.0021079	0.00083607	0	0	0	0	0.0375632	0.0145139	0.0174271	0.00630976	0.00568548	0.00346956	0.00406434	0.00186418	0.00241209	0.00129744	0.00246089	0.00178169	0.00790399	0.000464416	0.000186832	0.000260105	0.000135236	0.00547484	0.000186597	5.24168e-06	1.07365e-06	1.07365e-06	0.0922672	0.0208362	0.0166067
LPC [16:0]	0.0144676	0.00283357	0.0194183	0.00308756	0.0125998	0.0029631	0.01378	0.00185238	0.0119453	0.00227239	0.0115477	0.00142973	0.0156604	0.00860628	0.0163048	0.0155298	0.0180806	0.00456747	0.0154643	0.00310739	0.00527586	0.00217154	0.00300174	0.00237514	0.0132216	0.00156859	0.0198372	0.00197124	0.0246616	0.00589155	0.0188791	0.00155025	0.017221	0.00121231	0.0210045	0.00280503	0.110172	0.4742	0.742731	0.295384	0.186274	0.952887	0.689186	0.972176	0.112671	0.070007	0.010429	0.0313748	0.0113057
LPC [18:1]	1.43424	0.175465	1.06088	0.18517	0.693918	0.15137	0.57499	0.0195026	0.483726	0.153869	0.412641	0.0295489	1.14493	0.0388977	1.13465	0.144928	0.854242	0.126293	0.683629	0.132361	0.298227	0.0506646	0.185448	0.0274978	1.46924	0.392354	1.12619	0.201917	0.759939	0.261687	0.625183	0.130602	0.515445	0.0933383	0.494573	0.0342117	0.0643181	0.00521289	0.00108434	0.00212927	0.000574257	0.911265	0.0189396	0.00441791	2.13214e-05	4.02823e-06	0.24936	0.0597347	0.0241133
LPC [18:0]	0.00302718	0.00162676	0.0430914	0.00940966	0.0300409	0.007676	0.0186683	0.00294163	0.00893885	0.00363329	0.00644884	0.00343703	0.00463187	0.00119805	0.05	0.00991525	0.0801662	0.0118521	0.0904375	0.0119916	0.0666707	0.00784897	0.0386286	0.00578045	0.00416651	0.00123876	0.0526518	0.00882678	0.0448534	0.01088	0.0264971	0.00177676	0.0159866	0.00108836	0.0150072	0.00306993	0.00190471	0.00397138	0.0012872	0.0618387	0.194107	0.00141036	0.000390585	0.000248419	0.000172531	0.000567522	0.000707433	0.00299873	5.77946e-05
LPC	1.487	0.183732	1.14064	0.202068	0.742183	0.163938	0.609779	0.0207683	0.506452	0.161309	0.431068	0.0324282	1.19052	0.0479792	1.21534	0.169107	0.957649	0.143249	0.791638	0.148273	0.370173	0.0604675	0.227079	0.0330241	1.52419	0.407383	1.2161	0.215378	0.83514	0.274485	0.674624	0.132884	0.551065	0.0936273	0.533046	0.0365104	0.0930009	0.0063441	0.00119543	0.00225614	0.00060701	0.818791	0.0558136	0.0113938	5.12482e-05	8.83407e-06	0.311292	0.0720131	0.0264385
PC [26:1]	0.11111	0.0170159	0.0921218	0.0088698	0.0941612	0.0262802	0.0734428	0.00707969	0.0749028	0.00375106	0.077284	0.00787528	0.117951	0.00960398	0.0911387	0.00677918	0.0820339	0.0172368	0.077377	0.00863354	0.0634374	0.00477593	0.069444	0.0121322	0.126517	0.00528022	0.130984	0.0159918	0.108696	0.0171005	0.09367	0.0212753	0.0884534	0.0262163	0.0775673	0.0198401	0.161693	0.401505	0.0240138	0.0227758	0.0353647	0.0168121	0.034423	0.00553663	0.000918712	0.00558108	0.669816	0.159671	0.0603396
PC [26:0]	0.544071	0.027125	0.42873	0.013077	0.333454	0.0351814	0.282721	0.012254	0.186973	0.0133904	0.18252	0.0196287	0.618379	0.0322836	0.416526	0.0539706	0.32849	0.0433192	0.253716	0.0253296	0.134639	0.0214091	0.112157	0.0085091	0.643211	0.0547049	0.47749	0.0301538	0.386408	0.0653139	0.314898	0.0529087	0.224193	0.0271349	0.256603	0.0332008	0.00267849	0.00119853	0.000108993	3.37887e-05	4.81117e-05	0.0051257	0.000745745	0.000103948	2.70284e-05	1.24919e-05	0.0100676	0.00642399	0.00171494
PC [28:1]	1.12008	0.0513808	0.94028	0.0376965	0.729125	0.060895	0.595384	0.0552096	0.34984	0.0137073	0.293461	0.0292884	1.28238	0.0889149	0.884788	0.114467	0.665571	0.0939487	0.486118	0.0630274	0.220721	0.0418736	0.157964	0.0141632	1.60958	0.0706456	1.28179	0.0601888	1.0498	0.119394	0.832161	0.0961566	0.517004	0.0263589	0.478482	0.0488344	0.00812051	0.00105113	0.00027198	1.4988e-05	1.72727e-05	0.00896303	0.0011725	0.000224554	4.80426e-05	2.70206e-05	0.0036157	0.0022051	0.00035133
PC [28:0]	0.778915	0.0704853	0.735759	0.0415229	0.666223	0.0970245	0.644918	0.0178349	0.578797	0.0350844	0.622139	0.070091	0.958302	0.018509	0.765157	0.0678851	0.724071	0.072171	0.686857	0.0512955	0.543838	0.0627774	0.516248	0.0397931	0.915705	0.0211102	0.817686	0.055652	0.772231	0.0737017	0.733778	0.0637068	0.734247	0.0386849	0.887142	0.0803595	0.412562	0.178941	0.033149	0.0116701	0.0523489	0.00894172	0.00552417	0.000995012	0.000392542	6.33724e-05	0.0462873	0.031632	0.00934197
PC [30:1]	1.12719	0.0309376	0.941922	0.0142361	0.739997	0.0721897	0.635757	0.0465509	0.452534	0.0115152	0.419598	0.0428117	1.30169	0.0559795	0.890459	0.104485	0.677094	0.0885887	0.526538	0.0621235	0.292008	0.0423387	0.242366	0.0165704	1.50923	0.0531527	1.17499	0.104003	0.971115	0.100173	0.821606	0.0819631	0.611013	0.0263202	0.604829	0.0580896	0.000707206	0.00103241	0.000108424	3.80112e-06	2.04465e-05	0.00386134	0.000496762	8.80105e-05	1.54011e-05	6.10846e-06	0.00772436	0.0011945	0.00025981
PC [30:0]	0.156091	0.014973	0.163663	0.00978708	0.16279	0.0251154	0.169869	0.00261779	0.188233	0.014301	0.219819	0.0254878	0.201557	0.00952239	0.173197	0.01277	0.178005	0.0167892	0.186047	0.00850536	0.187406	0.0174474	0.20914	0.0170631	0.172061	0.00435677	0.172588	0.0109372	0.178834	0.0122675	0.189987	0.0107454	0.222662	0.00638408	0.275512	0.0196593	0.504085	0.711766	0.191492	0.0547289	0.0202254	0.0368031	0.102096	0.103185	0.285067	0.538272	0.941864	0.418488	0.0553517
PC [32:1]	0.231575	0.00887391	0.22321	0.0167948	0.190055	0.0346646	0.184999	0.0162523	0.177257	0.0269858	0.203872	0.0418195	0.23966	0.0258344	0.173849	0.0238195	0.141687	0.0223739	0.123632	0.0284658	0.0861114	0.0105833	0.0868664	0.007302	0.267079	0.0214869	0.222265	0.00859497	0.207304	0.0251217	0.200121	0.0283567	0.211498	0.0147909	0.252021	0.0259395	0.488104	0.114824	0.0120941	0.029602	0.324508	0.0315573	0.00767706	0.0063927	0.000677984	0.000594038	0.0284614	0.0351203	0.0310889
PC [32:0]	0.0323733	0.00476168	0.0427618	0.00474578	0.049836	0.0087701	0.0587736	0.00118096	0.065384	0.00566336	0.072477	0.0122742	0.0387705	0.00281966	0.041788	0.0037128	0.0473167	0.00448229	0.0516511	0.00281436	0.0573674	0.00810794	0.0621322	0.0087118	0.0280883	0.0055066	0.0355611	0.00442136	0.0450086	0.00350771	0.0519676	0.00256036	0.0559211	0.00131413	0.0587628	0.00408962	0.0554318	0.0387478	0.000737485	0.00151015	0.00618673	0.325024	0.0490441	0.00499195	0.019907	0.0115199	0.140765	0.010916	0.00242872
PC [34:2]	0.796616	0.0522207	0.603914	0.0278722	0.505683	0.0780819	0.458891	0.0190756	0.399425	0.0272249	0.464392	0.0497835	0.814475	0.0606142	0.463964	0.0377632	0.373599	0.0198243	0.328225	0.0147622	0.232718	0.0260438	0.217716	0.0261503	0.863655	0.0435306	0.588998	0.0362117	0.514267	0.0498536	0.469822	0.0415194	0.463367	0.0305466	0.525129	0.0296994	0.00486939	0.00582892	0.000461437	0.000307042	0.00133935	0.00105009	0.000278791	0.000174219	0.000107172	9.71742e-05	0.00109844	0.000794001	0.00034482
PC [34:1]	2.03291	0.274123	2.4616	0.234889	2.91871	0.530219	3.51648	0.0646071	4.74841	0.400446	5.9653	0.613088	2.07857	0.132042	1.9451	0.0521016	2.25197	0.0791387	2.61477	0.0747193	2.83144	0.362604	3.01998	0.510364	1.68647	0.0629088	1.98565	0.0840522	2.45584	0.261045	2.98308	0.242804	4.04635	0.194522	5.30493	0.224459	0.108839	0.0619518	0.000800586	0.000634275	0.000532156	0.178739	0.122809	0.00360699	0.0278065	0.0364646	0.00783981	0.00769084	0.000860692
PC [34:0]	0.000606641	0.000528216	0.00473439	0.00096029	0.0106402	0.00351656	0.0190831	0.00264099	0.0165322	0.000448049	0.0117233	0.00394216	0.00320729	0.000483044	0.00841597	0.00313307	0.0196755	0.00375873	0.0290987	0.00245639	0.0520719	0.00709806	0.0581702	0.00768104	0.000660528	0.000572325	0.00396137	0.00154952	0.011094	0.00202048	0.0167349	0.0041228	0.0170075	0.00413337	0.00958622	0.00076751	0.00285177	0.00811875	0.000287303	2.37551e-06	0.00839395	0.0465893	0.00166826	5.70772e-05	0.000285968	0.000245499	0.0257912	0.00100213	0.00259795
PC [36:2]	21.6214	0.99566	21.5658	0.766102	21.1518	2.1562	21.8987	0.823851	20.9752	1.05066	21.7874	2.54268	23.109	0.708267	21.1317	0.882279	21.0526	0.82782	21.2536	0.857563	18.7798	0.830543	18.7017	1.2102	22.6828	0.870833	21.6412	0.331746	21.9794	1.94562	22.2997	1.40681	21.4401	0.696768	22.4252	0.848107	0.942497	0.749188	0.729071	0.482523	0.921234	0.0388949	0.0308116	0.0445894	0.00235205	0.00552834	0.124947	0.598233	0.708864
PC [36:1]	0.205943	0.0425179	1.14266	0.192655	1.95367	0.412881	2.41574	0.0683602	3.46057	0.360748	4.15518	0.456072	0.275868	0.0261915	1.5583	0.124981	3.18679	0.237251	4.49251	0.0519373	7.65561	0.726436	10.141	1.09356	0.155946	0.0420456	0.982092	0.0311875	1.66453	0.180538	2.0331	0.135683	2.70405	0.103118	2.76423	0.131018	0.00119193	0.00187895	1.17081e-06	0.000100641	0.000117121	6.41182e-05	2.96947e-05	2.41314e-08	6.14267e-05	9.808e-05	1.06531e-05	0.000147011	2.15851e-05
PC [38:2]	0.138668	0.0145286	0.185513	0.00954058	0.207155	0.0334457	0.223895	0.00331856	0.228989	0.0146203	0.232417	0.0291032	0.150594	0.0095938	0.171536	0.00985763	0.199056	0.0150635	0.214114	0.00917888	0.208722	0.0240675	0.222949	0.0242185	0.134068	0.00598486	0.173791	0.00903006	0.199065	0.0179772	0.218461	0.014134	0.221901	0.00662508	0.234972	0.0173163	0.0095308	0.031285	0.000583055	0.0016163	0.00753332	0.057763	0.00930852	0.00115795	0.0177517	0.00857934	0.0031492	0.00402394	0.000678785
PC [40:2]	0.0208341	0.00872607	0.0336071	0.00421429	0.0338338	0.00898862	0.0400971	0.00342476	0.0392867	0.00584125	0.0325153	0.0086247	0.0322865	0.00257979	0.0394917	0.002428	0.0482714	0.00195718	0.0534251	0.00126924	0.0527387	0.0075433	0.0548053	0.00525626	0.0216555	0.00823998	0.029838	0.00717255	0.0361153	0.00399481	0.0419518	0.00221015	0.0407962	0.00196813	0.037156	0.00370417	0.084505	0.146695	0.0236025	0.038264	0.174482	0.0243911	0.00102726	0.000219067	0.0113039	0.00263823	0.264286	0.0521735	0.0146047
PC [40:1]	0.000331785	0.000574668	0.00312728	0.00109678	0.00404961	0.00128698	0.00686793	0.00209553	0.010777	0.00354469	0.0123878	0.00268179	0.000541317	0.000472547	0.00317139	0.000912122	0.0127299	0.00341729	0.0236497	0.00340342	0.0543901	0.00579572	0.071401	0.00619101	0.000237799	0.00041188	0.00117693	0.00101964	0.0035306	0.00382086	0.00595475	0.00239438	0.0103913	0.003308	0.0106046	0.00208493	0.0173874	0.0102704	0.00647129	0.00729176	0.00159743	0.011382	0.0036113	0.000310485	8.8353e-05	3.86392e-05	0.213185	0.211951	0.015152
PC [42:1]	0.0256474	0.00647214	0.0586788	0.00269775	0.097087	0.0214766	0.130568	0.010074	0.186875	0.0203628	0.212113	0.0158401	0.0319432	0.00353033	0.0865232	0.00507299	0.172308	0.0247247	0.253942	0.0170185	0.521161	0.0543907	0.702139	0.0560521	0.0331139	0.013729	0.0591566	0.0062463	0.102007	0.0120787	0.127986	0.00713826	0.16986	0.00254144	0.173137	0.00973657	0.00122816	0.00527108	0.000109884	0.000197849	4.64047e-05	0.00010656	0.000623701	2.47111e-05	9.99458e-05	3.23714e-05	0.0403157	0.00284831	0.000445152
PC [44:1]	0.012216	0.00644285	0.0164981	0.00724998	0.0177346	0.00851353	0.0314013	0.00618465	0.0426357	0.00792369	0.0440585	0.00556753	0.020229	0.00307589	0.0261292	0.00530302	0.0426722	0.00598079	0.0567329	0.0049035	0.0929759	0.00755311	0.112982	0.0104272	0.00846058	0.00568298	0.0114024	0.00514819	0.0209173	0.00471547	0.0287604	0.00500762	0.0442305	0.00282788	0.042803	0.00272965	0.487077	0.421244	0.0204603	0.00670165	0.0029282	0.170846	0.00445034	0.00039893	0.000102424	0.000122066	0.542731	0.0431691	0.00971982
PC [46:1]	0.0637519	0.0106923	0.0807706	0.0103575	0.0983984	0.0209241	0.126665	0.014074	0.172006	0.02682	0.181028	0.0143859	0.0803216	0.00131188	0.101397	0.00429299	0.145516	0.0207666	0.184036	0.0139567	0.312596	0.0350518	0.38729	0.0275956	0.0502192	0.0159144	0.0682874	0.00572655	0.0906336	0.00496321	0.114278	0.00721054	0.164486	0.00842918	0.167705	0.0122284	0.118782	0.0630483	0.00351403	0.00289987	0.00034564	0.00124407	0.00559183	0.000213739	0.000329808	4.29613e-05	0.137939	0.0137062	0.0031503
PC [48:1]	0.126856	0.0196231	0.190982	0.0289879	0.247404	0.0467247	0.336196	0.0382395	0.464073	0.0871663	0.482577	0.0335619	0.149215	0.0056896	0.215667	0.0130258	0.332078	0.0480404	0.406712	0.0382998	0.647622	0.0815489	0.801692	0.0490048	0.107611	0.0240692	0.167896	0.0145576	0.242789	0.0157528	0.314669	0.0229478	0.472602	0.0341893	0.498885	0.0505794	0.0337637	0.0146123	0.00108135	0.00282957	9.26465e-05	0.00126427	0.00281342	0.000324378	0.00045492	2.15147e-05	0.0206182	0.00123971	0.000419279
PC [50:1]	0.00143804	0.00154566	0.0095779	0.00469424	0.0133695	0.00589507	0.0278565	0.00918138	0.0407715	0.0148246	0.0350883	0.00505998	0.00142886	0.00151766	0.00821058	0.00282268	0.0240551	0.00790325	0.0302637	0.00767802	0.0506283	0.00590041	0.0636071	0.00357111	0.000894824	0.00154988	0.00629594	0.00607144	0.0201007	0.00752897	0.0281534	0.00644607	0.0485208	0.00624307	0.0513302	0.00403987	0.0462681	0.0275044	0.00795996	0.0102547	0.000385966	0.0214817	0.00822133	0.00309434	0.000151559	1.00238e-05	0.209741	0.0123732	0.0020552
PC	29.1487	1.53267	29.9259	1.19827	30.2251	3.65384	31.8783	0.755288	32.8595	2.06677	35.7073	3.9104	31.5064	0.938385	29.1965	1.30747	30.7056	1.60741	32.333	1.20542	33.078	2.2293	36.0118	2.99846	31.0172	0.917769	30.0331	0.730576	31.0597	2.76965	31.9208	2.09238	32.5087	1.0253	35.1366	1.42254	0.527039	0.662468	0.0504879	0.0669134	0.0538302	0.0677794	0.497592	0.401689	0.323354	0.0679382	0.219829	0.981096	0.531004
LPE [16:1]	0.0275846	0.00358673	0.0102698	0.00370312	0.000976144	0.000623273	0.000204715	0.000354577	0.000282053	0.000488529	0	0	0.0155181	0.00267749	0.0116297	0.00203717	0.00141323	0.0016355	0.000169129	0.00029294	0	0	0	0	0.0228745	0.00880876	0.00648239	0.00426411	0.00147077	0.000981477	0.000334423	0.00033158	0.000340797	0.000303077	0.000503181	0.000174435	0.00434735	0.000224191	0.000192703	0.000198191	0.000183611	0.115877	0.00146708	0.000591138	0.000553691	0.000553691	0.0440689	0.0138881	0.011432
LPE [18:1]	0.889406	0.0869658	0.475223	0.0865054	0.324055	0.0372114	0.254951	0.0242619	0.263219	0.0138974	0.28095	0.0413577	0.809824	0.0984424	0.62769	0.0512195	0.38555	0.0480614	0.29887	0.0329819	0.166401	0.0232932	0.132491	0.0023202	1.03697	0.247561	0.531134	0.0543112	0.3055	0.0638173	0.267256	0.0209387	0.230175	0.0220855	0.269061	0.036435	0.00426344	0.000491495	0.000261521	0.000249768	0.000395991	0.0467351	0.00257035	0.00103916	0.000385906	0.000284305	0.025892	0.00772981	0.00582243
LPE [20:1]	0.0851728	0.00590546	0.0397397	0.00684714	0.0171807	0.00561917	0.0052138	0.00292396	0.00271508	0.00169698	0.00393919	0.00106267	0.0695041	0.00983883	0.0439471	0.0034036	0.021683	0.00261288	0.0121705	0.00465249	0.00122722	0.000629194	0.000374279	0.00019036	0.109578	0.0439374	0.0439256	0.00673408	0.0180684	0.00580194	0.0079691	0.00145312	0.00740689	0.00376829	0.00903987	0.00399774	0.000959815	0.000133448	3.02951e-05	2.03037e-05	1.96071e-05	0.0131383	0.00124133	0.000800444	0.000276869	0.000261842	0.0627566	0.0232433	0.0160854
LPE	1.00216	0.0950285	0.525233	0.0959714	0.342212	0.0427581	0.260369	0.0250348	0.266216	0.0151392	0.284889	0.0409289	0.894846	0.108313	0.683267	0.0559691	0.408646	0.0515476	0.311209	0.037582	0.167628	0.0236004	0.132865	0.00246191	1.16942	0.299256	0.581542	0.0624732	0.32504	0.0705227	0.275559	0.0220613	0.237923	0.0254882	0.278604	0.0381805	0.00361824	0.000392401	0.000197571	0.000187666	0.000275785	0.0397138	0.00216835	0.000912957	0.000342109	0.000260642	0.0290849	0.00892574	0.0067001
PE [32:1]	0.0752287	0.00322374	0.0661906	0.00449577	0.0571414	0.0085326	0.0468918	0.00415442	0.0363163	0.00586177	0.0325966	0.00519472	0.0693652	0.00515329	0.0541011	0.00614866	0.0392646	0.00369021	0.0298841	0.00319654	0.0134537	0.00277219	0.00616433	0.000160818	0.0953383	0.0141545	0.0663101	0.00664927	0.0534866	0.00385005	0.0464565	0.0025981	0.0363187	0.00628563	0.0398207	0.0059247	0.0473568	0.0264234	0.000733523	0.000546004	0.000269521	0.0300611	0.0011909	0.000352378	7.80749e-05	2.90942e-05	0.0324334	0.00780708	0.00417198
PE [34:2]	0.490487	0.0762976	0.329612	0.0538463	0.25918	0.0560737	0.161413	0.0332227	0.113192	0.0384584	0.119161	0.0248597	0.360989	0.0552001	0.257934	0.0291139	0.167532	0.0451016	0.122601	0.0401214	0.0427101	0.0295373	0.0250217	0.0132682	0.41634	0.0658513	0.297047	0.00949405	0.193103	0.0107157	0.148065	0.0236173	0.0776839	0.0135712	0.11455	0.0199952	0.0405852	0.0133576	0.00237824	0.00157012	0.00131459	0.0459211	0.00930365	0.00376467	0.000917683	0.000510742	0.0360258	0.00440727	0.00266693
PE [34:1]	2.30653	0.162033	2.46305	0.0869927	2.69812	0.0583243	2.66524	0.068959	3.10505	0.0212524	3.27211	0.281435	2.141	0.0929316	2.2618	0.0426968	2.31823	0.05017	2.30498	0.0633378	2.13664	0.153258	1.9064	0.167301	2.02538	0.156474	2.13367	0.150041	2.20231	0.186224	2.37951	0.116516	2.69168	0.169869	2.57255	0.121378	0.214472	0.0169805	0.0242709	0.00106809	0.00674461	0.110205	0.0438237	0.0649808	0.968381	0.100969	0.435748	0.276202	0.0347112
PE [36:2]	7.86462	0.190109	6.36381	0.238236	5.90322	0.336275	5.09294	0.0352974	4.73538	0.0887943	4.84474	0.450158	8.17332	0.0458885	6.58288	0.0657479	5.92932	0.170109	5.42864	0.140337	4.33646	0.23339	3.75701	0.375973	8.56396	0.304494	6.96142	0.248536	6.03889	0.15354	5.71365	0.113757	5.32485	0.189052	5.22685	0.214668	0.0010371	0.000922081	1.56207e-05	1.33425e-05	0.000431619	4.28165e-06	2.49925e-05	5.54713e-06	9.76277e-06	3.54875e-05	0.00212089	0.00021306	0.000109569
PE [36:1]	0.13278	0.0212424	0.16237	0.0168608	0.223721	0.0150319	0.259501	0.0164934	0.358487	0.0109343	0.437811	0.0512631	0.183659	0.00479126	0.242333	0.00285922	0.337093	0.00935284	0.421696	0.0244527	0.692294	0.0794876	0.775607	0.0948339	0.122162	0.0167872	0.156732	0.0090355	0.203968	0.0161008	0.259843	0.0167645	0.398206	0.0310623	0.412251	0.034506	0.131791	0.00375961	0.00122705	8.16498e-05	0.000679383	5.34357e-05	1.45174e-05	7.81366e-05	0.00037961	0.000417261	0.0348218	0.00367265	0.000550921
PE [38:1]	0.000533489	0.000636869	0.00362709	0.0015713	0.00948417	0.00266413	0.0109867	0.00212842	0.0179783	0.000398969	0.0225535	0.00498029	0.00122559	0.000594279	0.00652662	0.00163278	0.0159491	0.000895116	0.0237169	0.0027107	0.049399	0.00415368	0.0602605	0.00100029	0	0	0.0027315	0.000434739	0.00836207	0.00394012	0.0090557	0.00205961	0.0197289	0.00338797	0.0189873	0.00527726	0.034172	0.00480389	0.00123378	2.2867e-06	0.00161127	0.0061526	1.86835e-05	0.000149418	3.77331e-05	1.005e-07	0.000404727	0.0212803	0.00159595
PE [40:1]	9.84156e-05	0.000170461	0	0	0.000118952	0.000206031	0.000474356	0.000113792	0.000821129	0.000234107	0.00048634	0.00042522	0.0002022	0.000350221	0.00051033	0.000159651	0.000474769	0.000157336	0.001123	8.76433e-05	0.00568689	0.000512337	0.00781936	0.00166202	0	0	0.000269306	0.000256118	0	0	0	0	0.00023018	0.000208054	0.000185332	0.000321004	0.373901	0.900602	0.0336295	0.0124223	0.216356	0.237836	0.286216	0.0115316	0.00010624	0.00148079	0.142673
PE [42:1]	0.00761198	0.00574877	0.00612291	0.00159638	0.00976305	0.00500079	0.0112179	0.00364453	0.0162383	0.00642399	0.0164086	0.00756635	0.0108467	0.00441474	0.0163643	0.0034009	0.0232995	0.00724625	0.0287041	0.00914803	0.0503755	0.00568097	0.0549256	0.00577169	0.00438876	0.00364878	0.00271538	0.00243806	0.00758788	0.000772501	0.00854779	0.00220313	0.0201794	0.00715937	0.0126734	0.0045699	0.687818	0.650456	0.410757	0.158094	0.184115	0.161511	0.0638482	0.0382145	0.000680746	0.000463988	0.545049	0.211553	0.166278
PE [44:1]	0.0037112	0.00380565	0.00186314	0.000455915	0.00221838	0.00166128	0.00223187	0.000941653	0.00389009	0.00053463	0.00215932	0.0016814	0.00359367	0.00302467	0.0053325	0.00218148	0.00606113	0.00272504	0.00755548	0.0040771	0.0204126	0.00195135	0.0193079	0.00468466	0.00177433	0.00153336	0.00161117	0.00108048	0.00191373	0.000519963	0.00189236	0.00105245	0.00455151	0.00268952	0.00191129	0.000678652	0.450623	0.567236	0.549054	0.939612	0.553441	0.46461	0.353065	0.247848	0.00126685	0.00815465	0.887534	0.888674	0.91777
PE [46:1]	0.0475513	0.00784472	0.0451619	0.0047675	0.0460476	0.00725773	0.0489608	0.0049365	0.0548746	0.00457615	0.047195	0.00848956	0.0441478	0.00459274	0.0505202	0.00147426	0.0570397	0.00211342	0.0588267	0.0072138	0.0742857	0.00528554	0.0764006	0.00673329	0.0346229	0.00786557	0.0361704	0.00549906	0.0432339	0.00169328	0.0400448	0.00267794	0.0480322	0.00226517	0.0325483	0.0075203	0.675471	0.819445	0.80526	0.235028	0.959987	0.0840221	0.0115405	0.041021	0.00172984	0.00237207	0.793881	0.137397	0.321563
PE [48:1]	0.180997	0.013131	0.171704	0.00783682	0.17657	0.0145279	0.187058	0.00831266	0.195036	0.00945147	0.170007	0.0182266	0.14804	0.0111076	0.177564	0.00695147	0.197364	0.00927243	0.205413	0.00927228	0.239476	0.0164111	0.245938	0.0298905	0.150182	0.00922579	0.156278	0.00364056	0.180552	0.0184511	0.175495	0.0147788	0.172442	0.00735937	0.146295	0.00428802	0.351898	0.715316	0.536414	0.207272	0.444484	0.017504	0.00411761	0.002354	0.00132906	0.00601546	0.34704	0.0633084	0.0655977
PE [50:1]	0.0615299	0.00759804	0.0570184	0.00694597	0.053609	0.0100511	0.0525315	0.0051683	0.0547945	0.00264932	0.0405781	0.0129289	0.0491078	0.00787339	0.0529185	0.00576956	0.0513089	0.00743963	0.0487066	0.0129356	0.05685	0.00594816	0.0642326	0.0127121	0.0593449	0.0180703	0.0519187	0.0101127	0.0581949	0.00307231	0.0524197	0.00263053	0.0603707	0.00475708	0.0524365	0.0129532	0.490085	0.337426	0.16511	0.220717	0.0727695	0.535994	0.742636	0.965599	0.24573	0.154659	0.568145	0.918698	0.547139
PE	11.1717	0.0938905	9.67052	0.284864	9.4392	0.408149	8.53945	0.056793	8.69206	0.122824	9.00581	0.816076	11.1855	0.120805	9.70879	0.0645468	9.14294	0.216467	8.68184	0.200614	7.71804	0.48086	6.99908	0.685204	11.4735	0.463795	9.86687	0.411399	8.9916	0.337532	8.83498	0.207422	8.85427	0.385451	8.63107	0.375368	0.000974433	0.00200863	2.00562e-06	9.98765e-06	0.010286	4.84103e-05	0.000140023	5.00498e-05	0.000266451	0.000478859	0.0109177	0.00169583	0.000845638
DMPE [36:2]	1.28686	0.156353	0.704775	0.0919178	0.550112	0.0540451	0.383634	0.0228345	0.319373	0.012863	0.443524	0.0571127	1.47507	0.241455	0.711684	0.100833	0.482391	0.0469348	0.403439	0.0413646	0.262849	0.0174733	0.241489	0.0336432	2.04323	0.76808	0.838765	0.174548	0.613918	0.0999437	0.507176	0.0908712	0.564862	0.0989805	0.682152	0.115983	0.00512744	0.00152034	0.000584133	0.000435169	0.000929893	0.00721498	0.00220382	0.00162692	0.000972554	0.000934315	0.0570658	0.0330198	0.0262967
DMPE	1.28686	0.156353	0.704775	0.0919178	0.550112	0.0540451	0.383634	0.0228345	0.319373	0.012863	0.443524	0.0571127	1.47507	0.241455	0.711684	0.100833	0.482391	0.0469348	0.403439	0.0413646	0.262849	0.0174733	0.241489	0.0336432	2.04323	0.76808	0.838765	0.174548	0.613918	0.0999437	0.507176	0.0908712	0.564862	0.0989805	0.682152	0.115983	0.00512744	0.00152034	0.000584133	0.000435169	0.000929893	0.00721498	0.00220382	0.00162692	0.000972554	0.000934315	0.0570658	0.0330198	0.0262967
MMPE [36:2]	0.480251	0.0509453	0.281674	0.00948381	0.235863	0.00984223	0.174495	0.0165313	0.148793	0.0142174	0.198775	0.0358323	0.548724	0.0927856	0.283945	0.0224705	0.246996	0.00701027	0.221726	0.0200626	0.182619	0.0326486	0.160568	0.0192842	0.660645	0.131552	0.3384	0.054232	0.287311	0.0431017	0.246975	0.0384439	0.278873	0.0526216	0.308811	0.0366025	0.00267408	0.00122895	0.000587125	0.000408853	0.00143823	0.00862405	0.00493947	0.00396356	0.00297957	0.00208493	0.0172109	0.00951049	0.00639309
MMPE	0.480251	0.0509453	0.281674	0.00948381	0.235863	0.00984223	0.174495	0.0165313	0.148793	0.0142174	0.198775	0.0358323	0.548724	0.0927856	0.283945	0.0224705	0.246996	0.00701027	0.221726	0.0200626	0.182619	0.0326486	0.160568	0.0192842	0.660645	0.131552	0.3384	0.054232	0.287311	0.0431017	0.246975	0.0384439	0.278873	0.0526216	0.308811	0.0366025	0.00267408	0.00122895	0.000587125	0.000408853	0.00143823	0.00862405	0.00493947	0.00396356	0.00297957	0.00208493	0.0172109	0.00951049	0.00639309
LPI [16:0]	0.0217901	0.00822475	0.0326137	0.00457528	0.0402705	0.0101533	0.0255627	0.00738005	0.0209294	0.00567287	0.0129599	0.0105138	0.0171471	0.00317557	0.0314358	0.00737936	0.0390703	0.00869524	0.0465951	0.00628406	0.0300755	0.0124652	0.0129671	0.00292995	0.0271177	0.00515908	0.0436966	0.00512799	0.0511988	0.00422528	0.0553472	0.0123329	0.0384439	0.000626663	0.0382276	0.00538855	0.117197	0.0704697	0.586105	0.888608	0.31578	0.0369086	0.0148287	0.00192725	0.156688	0.16912	0.0168513	0.00333208	0.0216285
LPI [18:1]	0.636572	0.0743637	0.466289	0.0824701	0.344502	0.0893039	0.285145	0.0402378	0.270046	0.0132996	0.237744	0.0362836	0.482661	0.0955209	0.529597	0.117818	0.364384	0.0923091	0.303134	0.0882031	0.191422	0.0661397	0.128933	0.0328809	0.615253	0.0700686	0.504583	0.08312	0.333604	0.039965	0.343985	0.0507666	0.318667	0.0194786	0.41738	0.0658517	0.0566266	0.0121277	0.00197316	0.00109738	0.00112528	0.620387	0.19788	0.075034	0.0122361	0.00373256	0.152641	0.0037716	0.00557943
LPI [18:0]	0.000461965	0.000408136	0.000751613	0.000762089	0.000984056	1.13364e-05	0.00106582	0.000209829	0.000956447	0.000969548	0	0	0.000917208	0.000232924	0.00306142	0.000217881	0.00778345	0.000891145	0.0111313	0.0026512	0.0105688	0.0027658	0.00554576	0.00087416	0.000702989	0.000617892	0.00176183	0.000253706	0.00207145	0.00118763	0.00282987	0.00101472	0.00105813	0.000113039	0.0018323	0.00119987	0.59282	0.0911379	0.0848727	0.461238	0.121486	0.000310913	0.000207519	0.00265901	0.00382871	0.000895514	0.0516043	0.151353	0.036194
LPI	0.658824	0.0779647	0.499655	0.0847878	0.385757	0.0993765	0.311773	0.0464289	0.291932	0.0133407	0.250704	0.025927	0.500726	0.0924535	0.564094	0.125056	0.411238	0.0977717	0.360861	0.0927953	0.232066	0.0681373	0.147446	0.0353382	0.643073	0.0711534	0.550041	0.0862101	0.386874	0.0451593	0.402162	0.0623804	0.358169	0.0188751	0.457439	0.0636935	0.074886	0.0200427	0.00269348	0.00130267	0.00100304	0.51928	0.313536	0.138087	0.0154544	0.00347837	0.222882	0.006231	0.0116035
PI [26:0]	0.167454	0.0270269	0.14056	0.0199548	0.109393	0.0216963	0.0711688	0.00225864	0.0107797	0.00507825	0.00224882	0.00182928	0.160501	0.0126326	0.136174	0.00663755	0.0992465	0.00348156	0.0650232	0.015404	0.00745388	0.00183758	0.00288212	0.00175609	0.191448	0.0192986	0.167794	0.0020895	0.13127	0.00790139	0.088365	0.0106742	0.0246785	0.0113601	0.00953003	0.00376045	0.237851	0.0440471	0.00354784	0.00059167	0.000454422	0.041853	0.00126468	0.00114997	3.17741e-05	2.81689e-05	0.102421	0.00749997	0.00126525
PI [28:1]	0.102002	0.0169488	0.0643783	0.00721496	0.0276561	0.00346141	0.00963642	0.00278121	0.00172783	0.00177259	0.00129168	0.00112982	0.110617	0.010535	0.0843205	0.00406582	0.0464298	0.0122639	0.0266052	0.015074	0.00281932	0.00249552	0.00133612	0.000453255	0.148556	0.0174305	0.0985562	0.00500873	0.0647822	0.0118194	0.0367517	0.00920396	0.00861329	0.00361973	0.00289795	0.0025221	0.0240636	0.00173943	0.000739346	0.000522138	0.00050705	0.0156888	0.00234319	0.00138049	6.63362e-05	5.66158e-05	0.00880689	0.00232626	0.000601905
PI [28:0]	0.541213	0.0498574	0.51331	0.0451369	0.47453	0.0928935	0.395343	0.0194682	0.272274	0.0317614	0.188646	0.0234636	0.60793	0.0295961	0.601598	0.0268268	0.563016	0.0116078	0.529387	0.0178027	0.373787	0.0131752	0.283627	0.0217096	0.66927	0.0637656	0.623893	0.0168992	0.549614	0.0189258	0.493669	0.0273058	0.315363	0.0280528	0.233106	0.00627316	0.512122	0.334825	0.00916865	0.00140227	0.00037707	0.797252	0.0706693	0.0169755	0.000234263	0.000106348	0.299347	0.0356697	0.0118315
PI [30:1]	0.136905	0.0219125	0.0996295	0.0107541	0.0718156	0.00782295	0.0411684	0.00434083	0.0106835	0.00425468	0.00639729	0.00450651	0.15482	0.0120408	0.126439	0.0038404	0.0857178	0.00880313	0.0673163	0.0127295	0.0261648	0.0130057	0.0158448	0.00547781	0.195744	0.0209209	0.147956	0.00658859	0.11442	0.0059129	0.0785128	0.00750721	0.0388851	0.0123667	0.014844	0.0036308	0.0572791	0.0083674	0.00175794	0.000609108	0.000539855	0.0176996	0.0013087	0.000982673	0.000230318	5.36394e-05	0.0195412	0.00292485	0.000796784
PI [30:0]	0.205823	0.0131334	0.210623	0.0147214	0.2066	0.0283825	0.181617	0.00343143	0.14394	0.0128309	0.103884	0.00770161	0.244992	0.00707281	0.260562	0.0022264	0.27108	0.0102305	0.278186	0.0104985	0.24544	0.0102928	0.21067	0.0157409	0.248615	0.0260341	0.24819	0.00618424	0.230049	0.0104039	0.220226	0.0117304	0.166295	0.0108341	0.126661	0.00416285	0.695089	0.967718	0.0366249	0.00429225	0.000315906	0.022023	0.0220997	0.0104818	0.953362	0.0261785	0.979369	0.315317	0.160179
PI [32:1]	0.441334	0.0296848	0.415775	0.0278573	0.383658	0.0556412	0.339051	0.0123432	0.282407	0.0285824	0.257211	0.0282945	0.382999	0.000633033	0.357028	0.0103744	0.314886	0.0212323	0.283415	0.0236092	0.202621	0.00751238	0.166209	0.00158322	0.467044	0.0371372	0.433022	0.012437	0.374449	0.0126682	0.343582	0.0182733	0.278924	0.0141154	0.263189	0.00959577	0.337974	0.188354	0.00529128	0.00261107	0.0014743	0.0123707	0.00514376	0.00186932	2.02652e-06	2.55078e-09	0.206871	0.0150084	0.00666776
PI [34:2]	0.223501	0.0239067	0.190023	0.0131613	0.175033	0.0289046	0.150837	0.00550114	0.133023	0.011005	0.123871	0.0145676	0.184825	0.00857029	0.168138	0.00911172	0.137702	0.0157728	0.12147	0.00893125	0.0898405	0.00393229	0.0774062	0.00194051	0.232347	0.0256674	0.207049	0.0107966	0.175691	0.00540867	0.163082	0.00811472	0.145978	0.0011437	0.145271	0.00214915	0.100798	0.0888146	0.00683653	0.00399214	0.00351643	0.0819768	0.0104424	0.000894207	6.33535e-05	2.94145e-05	0.190685	0.0201027	0.0111891
PI [34:1]	20.7769	1.05691	22.8613	0.945285	23.2337	1.58416	23.2479	0.226127	23.6791	0.646823	23.2421	0.878498	18.0513	0.340885	19.5864	0.263929	19.7748	0.605623	19.7183	0.370034	19.4191	1.02522	18.5036	0.581654	18.8901	0.863739	21.2173	0.494279	20.9411	0.467164	21.3326	0.396247	21.4509	0.453319	21.7449	0.437325	0.0635668	0.08917	0.0166796	0.0153918	0.0359825	0.00350845	0.01269	0.00456692	0.0933972	0.309825	0.0154717	0.0224077	0.0112319
PI [36:2]	9.91175	0.511745	8.58499	0.249469	7.82778	0.655665	6.9683	0.192344	6.21881	0.14312	6.55032	0.783467	10.1182	0.209515	9.7796	0.0908223	8.24677	0.448111	7.32741	0.0980795	6.14037	0.31825	5.94696	0.327094	10.7985	0.757243	9.8229	0.293141	8.74759	0.134604	8.33799	0.178268	8.60261	0.268942	9.14408	0.354659	0.0156496	0.0122549	0.000736018	0.000273099	0.00339782	0.0621156	0.00280496	3.10022e-05	5.49984e-05	4.91867e-05	0.105895	0.00989062	0.00540486
PI [36:1]	2.77818	0.209481	3.16029	0.198166	3.46797	0.0907747	3.53245	0.284908	3.66555	0.174925	3.44986	0.360742	3.84983	0.116625	5.11765	0.0568771	6.38581	0.325733	7.28167	0.463234	8.86841	0.395331	9.09268	0.365574	2.69266	0.125678	3.16774	0.1405	3.53411	0.0234994	3.70404	0.0947254	4.16128	0.143089	3.71076	0.225874	0.0833796	0.00636981	0.0209382	0.00489092	0.0493686	7.14704e-05	0.000221712	0.000239836	2.98832e-05	1.89048e-05	0.0120131	0.000337851	0.000370689
PI	35.2851	1.53529	36.2409	1.13558	35.9781	2.46141	34.9375	0.218863	34.4182	0.96625	33.9258	1.37906	33.8659	0.505665	36.218	0.418435	35.9255	1.38368	35.6988	0.897746	35.376	1.54368	34.3012	1.21845	34.5343	1.92142	36.1344	0.676386	34.863	0.556427	34.7988	0.391564	35.1936	0.430005	35.3953	0.857391	0.434881	0.700264	0.717644	0.454382	0.317618	0.0034277	0.0726487	0.0368931	0.182653	0.598256	0.245284	0.790083	0.826769
LPS [18:1]	0.377799	0.11821	0.307564	0.10983	0.227628	0.102717	0.14582	0.0493881	0.110967	0.0167162	0.101623	0.0274908	0.316553	0.12867	0.377263	0.0948124	0.281344	0.125241	0.195119	0.0622221	0.090815	0.0174231	0.0638304	0.014848	0.277796	0.0931362	0.238104	0.0641129	0.13401	0.0339438	0.107038	0.0281707	0.0724285	0.00869802	0.0740287	0.0195018	0.492844	0.172067	0.034972	0.0179754	0.0169394	0.546536	0.75122	0.215097	0.0395025	0.0277975	0.576008	0.0658933	0.0384179
LPS	0.377799	0.11821	0.307564	0.10983	0.227628	0.102717	0.14582	0.0493881	0.110967	0.0167162	0.101623	0.0274908	0.316553	0.12867	0.377263	0.0948124	0.281344	0.125241	0.195119	0.0622221	0.090815	0.0174231	0.0638304	0.014848	0.277796	0.0931362	0.238104	0.0641129	0.13401	0.0339438	0.107038	0.0281707	0.0724285	0.00869802	0.0740287	0.0195018	0.492844	0.172067	0.034972	0.0179754	0.0169394	0.546536	0.75122	0.215097	0.0395025	0.0277975	0.576008	0.0658933	0.0384179
PS [34:1]	3.34226	0.115034	3.44977	0.135643	3.73798	0.22849	3.63968	0.0522995	3.63328	0.325094	3.04225	0.337496	3.11494	0.127407	3.06198	0.059544	2.58049	0.184906	2.33321	0.150116	2.32994	0.103468	2.36612	0.0761966	2.7433	0.175333	2.77546	0.124736	2.95697	0.324407	2.95822	0.216072	2.79788	0.13581	2.37135	0.0116348	0.354173	0.0552649	0.0151396	0.21763	0.218756	0.549802	0.0145836	0.00234281	0.00115908	0.000945708	0.808533	0.372354	0.251965
PS [36:2]	3.39392	0.0819475	3.73784	0.178222	3.8674	0.243819	3.37074	0.072188	2.61048	0.194304	2.16078	0.307761	3.32814	0.205951	4.17862	0.215233	3.46682	0.116303	3.09831	0.110747	2.8137	0.176428	2.59564	0.110578	3.19272	0.216621	3.62989	0.142428	3.76305	0.44474	3.37561	0.321172	2.69597	0.13793	2.14916	0.030223	0.0385258	0.0332719	0.731742	0.00300008	0.00257294	0.00778933	0.367297	0.163889	0.0303368	0.00558901	0.0432119	0.11653	0.459437
PS [36:1]	0.26737	0.018343	0.338034	0.0243831	0.480712	0.0526001	0.494954	0.0451184	0.51257	0.0339011	0.488441	0.108807	0.40476	0.0311487	0.537615	0.0290058	0.638956	0.0783915	0.745281	0.102163	1.10604	0.0495654	1.1402	0.0408528	0.219542	0.0181025	0.316386	0.0171627	0.455387	0.0811699	0.50174	0.0806818	0.543874	0.0709606	0.45271	0.0381424	0.0159794	0.00268003	0.00126668	0.000385691	0.02558	0.00566783	0.00859267	0.00525141	3.18768e-05	1.57021e-05	0.00254733	0.00797533	0.00410036
PS	7.00355	0.194432	7.52564	0.330368	8.08609	0.513891	7.50537	0.0757955	6.75633	0.517808	5.69147	0.753205	6.84785	0.301154	7.77821	0.245756	6.68627	0.353405	6.1768	0.335467	6.24967	0.22998	6.10197	0.143842	6.15556	0.407408	6.72173	0.245086	7.17541	0.847267	6.83557	0.606252	6.03772	0.341436	4.97322	0.0583709	0.0777463	0.0269632	0.0140871	0.48205	0.0431806	0.0143101	0.579182	0.061443	0.0522156	0.0179791	0.108138	0.133448	0.18215
PG [34:1]	0.0103451	0.00537223	0.0048302	0.00233472	0.0037346	0.00116911	0.00409651	0.0014186	0.00434533	0.00353522	0.0060175	0.00262479	0.00832536	0.00335089	0.00390768	0.00251388	0.000722518	0.000891709	0.000923531	0.000282286	0.00105041	0.000223854	0.002559	0.000196796	0.00872512	0.0049737	0.00309284	0.00221492	0.00304179	0.00179615	0.00213491	0.00120704	0.00346047	0.00221257	0.00324869	0.00198597	0.178283	0.105717	0.123262	0.18142	0.278246	0.141788	0.0191417	0.0189004	0.0199124	0.0409222	0.147648	0.136162	0.0895857
PG [36:2]	0.00930343	0.00534731	0.00252703	0.00087538	0.00209288	0.000509148	0.000939797	0.00089996	0.00144402	0.000982955	0.00126795	0.00112387	0.0120087	0.00352635	0.00420364	0.00157435	0.00145282	0.000612404	0.00116228	0.0010077	0.00178827	0.000749276	0.00230087	0.000449186	0.0125816	0.00563054	0.00235904	0.000978619	0.00180854	0.00048341	0.000779827	0.000698727	0.00126593	0.00150477	0.000882529	0.00021959	0.0962277	0.0806879	0.055719	0.0664963	0.0634985	0.0248822	0.00694226	0.00687446	0.00798417	0.00910393	0.0362847	0.029882	0.0227016
PG [36:1]	0.00166957	0.00187606	0.000215422	0.000373122	0.000759385	0.000106383	0.000490947	0.000850346	0.0012244	0.000527347	0.000399275	0.000691564	0.00297411	0.00215652	0.000839994	0.00109474	0.000558471	0.000483758	0.00213357	0.000849485	0.00548366	0.00282693	0.00828855	0.00248586	0.0010617	0.000947362	0.000170558	0.000295415	0.000593571	0.000521372	0.000191722	0.000332072	0.00123672	0.00053598	0	0	0.258301	0.4487	0.377743	0.712549	0.332929	0.201138	0.131276	0.564002	0.288627	0.0489579	0.19483	0.495057	0.207748
PG	0.0213181	0.012437	0.00757266	0.00295491	0.00658686	0.0016817	0.00552725	0.00288998	0.00701375	0.00439242	0.00768472	0.00406804	0.0233082	0.00859008	0.00895132	0.00512444	0.00273381	0.00186909	0.00421938	0.00213128	0.00832233	0.00369728	0.0131484	0.00281427	0.0223684	0.0115503	0.00562244	0.00333078	0.0054439	0.00271702	0.00310646	0.00155833	0.00596312	0.00362965	0.00413122	0.00186973	0.136016	0.111821	0.0988577	0.133526	0.145459	0.0677689	0.0154293	0.0201967	0.050049	0.123418	0.0733273	0.068908	0.045812
LPA [18:1]	0.0184466	0.0105207	0.020895	0.00549576	0.00504958	0.000557231	0.00408715	0.00128279	0.00568218	0.0045067	0.00523519	0.00437804	0.0166843	0.00658256	0.0287498	0.0049888	0.01918	0.00333455	0.0123181	0.00533176	0.00843482	0.00423672	0.00501844	0.00167134	0.0175688	0.012079	0.0195763	0.00348087	0.0107534	0.00426721	0.00837698	0.00373479	0.00763016	0.00415294	0.00531866	0.00209505	0.738936	0.0923942	0.0788023	0.125573	0.115048	0.0646515	0.589472	0.422445	0.142003	0.0409325	0.795784	0.408947	0.276419
LPA	0.0184466	0.0105207	0.020895	0.00549576	0.00504958	0.000557231	0.00408715	0.00128279	0.00568218	0.0045067	0.00523519	0.00437804	0.0166843	0.00658256	0.0287498	0.0049888	0.01918	0.00333455	0.0123181	0.00533176	0.00843482	0.00423672	0.00501844	0.00167134	0.0175688	0.012079	0.0195763	0.00348087	0.0107534	0.00426721	0.00837698	0.00373479	0.00763016	0.00415294	0.00531866	0.00209505	0.738936	0.0923942	0.0788023	0.125573	0.115048	0.0646515	0.589472	0.422445	0.142003	0.0409325	0.795784	0.408947	0.276419
PA [34:1]	0.0843046	0.0075747	0.0649356	0.00884185	0.0674397	0.0131234	0.0829205	0.00793755	0.128912	0.00870432	0.169656	0.0160775	0.0891418	0.0143163	0.0512735	0.00516432	0.0465862	0.00993428	0.0405741	0.0143904	0.0511684	0.0167499	0.0556776	0.00593674	0.0867143	0.018543	0.0693299	0.0137874	0.0737927	0.0141025	0.0852471	0.0191851	0.117541	0.0127288	0.119676	0.025716	0.0449475	0.126137	0.837735	0.00258793	0.0011411	0.0125495	0.0133707	0.0143279	0.0405393	0.0201237	0.26249	0.391108	0.9287
PA [36:2]	0.390333	0.0487785	0.395052	0.0216938	0.449218	0.0267758	0.462862	0.0690988	0.592479	0.0901667	0.667562	0.0632924	0.514541	0.0731702	0.371212	0.0479691	0.376947	0.0033582	0.358611	0.0282618	0.360726	0.0458216	0.338014	0.057844	0.555063	0.105069	0.518146	0.0364666	0.531185	0.069855	0.566809	0.0785012	0.619451	0.0506815	0.567095	0.0440107	0.885747	0.140751	0.211662	0.0268944	0.00386103	0.0469904	0.0312684	0.0262175	0.0367212	0.0305565	0.596123	0.759509	0.884243
PA [36:1]	0.0495931	0.0134779	0.0915573	0.0107953	0.0945739	0.0142716	0.098828	0.0064429	0.142912	0.0113835	0.176155	0.0146056	0.0669212	0.0227878	0.10179	0.0185933	0.121761	0.0103478	0.130782	0.0126289	0.168714	0.0129683	0.187149	0.0162641	0.0431244	0.01872	0.085007	0.00363835	0.101514	0.00446904	0.10782	0.0148356	0.13113	0.0153283	0.105307	0.0245246	0.0135957	0.0165538	0.00465646	0.000787912	0.000384071	0.109258	0.0191817	0.0132053	0.0025473	0.00174464	0.0190386	0.00627677	0.00936835
PA	0.524231	0.0499082	0.551545	0.00775528	0.611232	0.0170032	0.64461	0.0700531	0.864303	0.106802	1.01337	0.0939603	0.670604	0.0775235	0.524276	0.0429318	0.545294	0.0213835	0.529967	0.0531529	0.580608	0.074035	0.58084	0.0771038	0.684902	0.136034	0.672482	0.0413069	0.706492	0.0855436	0.759877	0.100294	0.868122	0.0751279	0.792077	0.093694	0.40196	0.0460215	0.0724429	0.00750917	0.00134734	0.0459285	0.0541554	0.0605876	0.21959	0.228102	0.887056	0.827411	0.485125
CL [62:2]	0.0277241	0.00299171	0.0270119	0.00163648	0.0255339	0.000964426	0.0275475	0.000927351	0.0253579	0.00190487	0.0182303	0.00279253	0.0251127	0.00305217	0.0252427	0.00346001	0.0233697	0.00268562	0.0213519	0.00618386	0.0205372	0.00475798	0.0147338	0.00284641	0.0288389	0.00195972	0.0295763	0.000728856	0.0337181	0.00398052	0.0334416	0.00206202	0.0302962	0.00145032	0.0218867	0.000848018	0.735853	0.293978	0.926933	0.312189	0.0158908	0.963426	0.498972	0.398353	0.233561	0.012572	0.574289	0.129522	0.0486919
CL [62:1]	0.0295483	0.00327122	0.0281359	0.0013917	0.0266767	0.0013466	0.0283084	0.00138237	0.0297265	0.00167393	0.0251453	0.00390758	0.030455	0.00254042	0.0299554	0.00134756	0.0288586	0.00380131	0.026393	0.00586246	0.0268324	0.0043316	0.0244643	0.00391728	0.030005	0.00114024	0.0337617	0.0033992	0.0339859	0.00434585	0.0327299	0.00269402	0.0345471	0.00178097	0.0288263	0.00191216	0.529203	0.232447	0.578011	0.937077	0.208865	0.778479	0.577963	0.332639	0.279608	0.0903705	0.143738	0.199661	0.181958
CL [64:3]	0.0177446	0.000374521	0.0181011	0.000563756	0.0142621	0.00106907	0.0153928	0.000783221	0.0117598	0.00206065	0.00612681	0.00295185	0.0187348	0.00257836	0.0196526	0.0029845	0.019	0.0038709	0.0161335	0.00537454	0.0136949	0.00492775	0.00833688	0.00199946	0.0229264	0.00204501	0.024361	0.00137246	0.0265117	0.00364619	0.0236401	0.00196856	0.0204184	0.00075317	0.0101399	0.0030084	0.413194	0.00598644	0.00936356	0.00776502	0.00249387	0.707519	0.926092	0.491809	0.191593	0.00525967	0.370078	0.211609	0.685668
CL [64:2]	0.055049	0.00682918	0.0534304	0.00514365	0.0500636	0.00378791	0.0550014	0.00344946	0.0561151	0.00728645	0.0424766	0.00199955	0.0581316	0.00572426	0.0595931	0.00310347	0.06161	0.00246881	0.056099	0.00517742	0.056758	0.0054857	0.0474668	0.00594464	0.0605835	0.00270173	0.0646421	0.00238322	0.0681006	0.0114776	0.0672083	0.00322635	0.0655816	0.00296897	0.0551042	0.00257089	0.759423	0.33087	0.991916	0.862299	0.037651	0.717257	0.388553	0.671957	0.779071	0.0887871	0.122782	0.331459	0.0526206
CL [64:1]	0.0326367	0.000729789	0.0287326	0.00102393	0.0276744	0.00482623	0.0295155	0.00256058	0.0342511	0.000570208	0.0293563	0.0043534	0.0396113	0.00423637	0.0395608	0.00177439	0.0394618	0.00140395	0.0373223	0.000430481	0.0381194	0.00381914	0.0352901	0.00386341	0.0340633	0.00223502	0.0370794	0.00096591	0.0376163	0.00387697	0.0355763	0.00182549	0.0423673	0.00325519	0.0356817	0.00388924	0.00577717	0.153066	0.112163	0.0391944	0.267473	0.985719	0.956522	0.404521	0.674009	0.261776	0.0984722	0.241081	0.415198
CL [66:3]	0.0165361	0.00105002	0.0165423	0.00206367	0.0146087	0.001948	0.0140493	0.000947864	0.0139974	0.00178326	0.00759341	0.00215543	0.0163891	0.0036541	0.0170855	0.00152104	0.0158717	0.00357415	0.0146729	0.00437433	0.0137181	0.0049123	0.0110633	0.00234864	0.0209248	0.00107893	0.0193036	0.00246404	0.0227428	0.00385536	0.0216988	0.002002	0.0196861	0.000734972	0.0115783	0.00261091	0.996554	0.205897	0.0382143	0.100796	0.00295634	0.775755	0.869328	0.629551	0.491914	0.100931	0.355476	0.47553	0.587206
CL [66:2]	0.0515624	0.00418325	0.047898	0.00414894	0.0448314	0.00288468	0.0500978	0.00345745	0.0556771	0.00498889	0.0474159	0.00719013	0.0518812	0.00669859	0.0497644	0.00177342	0.0518801	0.00304249	0.0450905	0.00657511	0.045425	0.00637235	0.042836	0.00604119	0.0512731	0.00259328	0.0533845	0.00422601	0.0563985	0.0112262	0.056666	0.00415488	0.0575209	0.00271273	0.0501112	0.00197723	0.342001	0.0834605	0.664523	0.335157	0.436631	0.624734	0.9998	0.278426	0.293057	0.157421	0.501701	0.483996	0.129171
CL [66:1]	0.0117912	0.00258071	0.0100468	0.00090793	0.00837437	0.00201153	0.0109726	0.00215901	0.0110701	0.0032025	0.0105043	0.00258935	0.0197204	0.0032375	0.0178685	0.00151265	0.0191663	0.00177276	0.0161333	0.00251698	0.0173175	0.00358453	0.0172572	0.00292086	0.0135797	0.00129409	0.0111165	0.00101158	0.0141999	0.00210144	0.0118532	0.00323591	0.0148961	0.0013309	0.0120711	0.0016771	0.331383	0.14477	0.695157	0.776513	0.57499	0.420144	0.807705	0.20433	0.43746	0.383258	0.0602148	0.685802	0.439243
CL [68:3]	0.0369228	0.00482809	0.0371037	0.0013598	0.0348994	0.00245215	0.0377751	0.00204755	0.0390938	0.00228892	0.0299979	0.00407064	0.0275453	0.00334701	0.0278369	0.00219863	0.026599	0.00470932	0.0256618	0.00544091	0.0257107	0.00471868	0.0230387	0.0026631	0.033677	0.00294149	0.035192	0.00230661	0.0378169	0.00539491	0.0378613	0.00289749	0.0383328	0.000342916	0.0304066	0.00323647	0.9532	0.552768	0.792297	0.520397	0.130344	0.905708	0.790732	0.636457	0.612052	0.142057	0.521404	0.308059	0.154062
CL [68:2]	0.161714	0.0090832	0.148113	0.00431072	0.146767	0.00761371	0.170935	0.00960825	0.220526	0.00444715	0.227713	0.0251098	0.109884	0.00661925	0.111033	0.00233488	0.11299	0.00561299	0.107025	0.0029568	0.112041	0.0114597	0.102265	0.00976722	0.11933	0.00799807	0.127211	0.00464734	0.133259	0.0144638	0.137312	0.00569854	0.165967	0.00516515	0.175414	0.00571763	0.079119	0.094292	0.293592	0.000546536	0.0128369	0.790867	0.568939	0.532147	0.791714	0.326035	0.214085	0.218157	0.0338092
CL [70:4]	0.0219808	0.00362691	0.0210381	0.0018066	0.0200119	0.000185317	0.0212492	0.000917851	0.0204807	0.00322618	0.0162208	0.0033426	0.0163173	0.00321118	0.0173728	0.000778253	0.016916	0.00234799	0.0143706	0.00446362	0.0158011	0.00308038	0.0140566	0.00130076	0.0200582	0.0031574	0.0222259	0.000578485	0.023391	0.0014547	0.0214589	0.00368144	0.0232155	0.000462785	0.0152427	0.00212544	0.707563	0.400881	0.751848	0.620824	0.113146	0.609522	0.807232	0.572886	0.850555	0.321573	0.307072	0.17215	0.643189
CL [70:3]	0.367117	0.0262111	0.341548	0.0015775	0.334512	0.0232318	0.37734	0.0215859	0.436535	0.0104224	0.398381	0.026564	0.27899	0.0310782	0.283937	0.00853425	0.293904	0.0199686	0.276509	0.0215358	0.288504	0.0377582	0.26211	0.0305252	0.300907	0.0326298	0.31822	0.0167757	0.345426	0.0344695	0.34139	0.00609436	0.3997	0.0193795	0.359312	0.0192422	0.166959	0.182178	0.629568	0.0130265	0.220384	0.803479	0.522898	0.914997	0.753065	0.538899	0.459632	0.17958	0.102216
CL [70:2]	0.231543	0.0195646	0.202754	0.0123215	0.200697	0.0167495	0.235555	0.0219311	0.300719	0.00210699	0.301254	0.0269529	0.237983	0.0141532	0.246034	0.00501302	0.25084	0.00310739	0.241945	0.00710573	0.27237	0.0220094	0.267925	0.0182028	0.18065	0.0146408	0.184242	0.0106644	0.19718	0.0189589	0.201312	0.00721925	0.265471	0.0152266	0.242852	0.0105804	0.0972499	0.106693	0.824703	0.00367851	0.0222513	0.405549	0.199144	0.687079	0.0851448	0.087722	0.748546	0.298004	0.0934514
CL [72:4]	0.208242	0.0156695	0.190981	0.00787775	0.184972	0.0132785	0.202208	0.0110961	0.218428	0.0107808	0.190403	0.0226735	0.189354	0.0217268	0.195583	0.00901479	0.203303	0.0121106	0.190314	0.0170272	0.194022	0.0295848	0.17452	0.0237036	0.194385	0.0191374	0.209475	0.00657404	0.223102	0.0223275	0.219552	0.00240019	0.230126	0.00592353	0.191651	0.0108417	0.163453	0.121221	0.615095	0.406123	0.32501	0.670282	0.386404	0.954851	0.836432	0.469016	0.266054	0.166013	0.0866791
CL [72:3]	0.269608	0.0203726	0.233181	0.0114343	0.228026	0.0155176	0.257825	0.0161073	0.300826	0.00466921	0.278725	0.0346063	0.33689	0.0235066	0.343439	0.00472448	0.355544	0.0131956	0.3431	0.0183554	0.377963	0.050053	0.362425	0.0285022	0.243797	0.0264235	0.248669	0.011281	0.267187	0.0273525	0.269047	0.00713138	0.313734	0.0201581	0.267541	0.0118448	0.0540579	0.0482028	0.475922	0.0608735	0.714211	0.660773	0.296837	0.736592	0.267679	0.297349	0.783599	0.346799	0.185296
CL [72:2]	0.0653056	0.00533388	0.0583375	0.00489467	0.0608211	0.00365668	0.0645369	0.00750267	0.0843336	0.0010443	0.0825546	0.013334	0.114214	0.00371669	0.119584	0.00864876	0.126595	0.00734747	0.128496	0.0042354	0.162165	0.0106433	0.178187	0.0145268	0.0596054	0.00512355	0.0571973	0.00275277	0.061944	0.00947761	0.0646372	0.00438642	0.0845888	0.00283038	0.0751744	0.0021605	0.17081	0.295968	0.891988	0.00373488	0.105985	0.379069	0.0597652	0.0117814	0.00180889	0.00178818	0.512956	0.726025	0.265894
CL	1.60503	0.0974165	1.46295	0.00783329	1.42273	0.0927477	1.59831	0.0992441	1.8589	0.0351805	1.7121	0.176254	1.57121	0.13225	1.60354	0.022205	1.64591	0.072635	1.56062	0.106574	1.68098	0.206004	1.58598	0.154495	1.41461	0.115305	1.47566	0.0563971	1.58258	0.175741	1.57538	0.0403668	1.80645	0.0704356	1.58299	0.0713665	0.0655051	0.0787386	0.93736	0.0132059	0.409214	0.697691	0.439522	0.919172	0.480735	0.906002	0.45632	0.238521	0.0848346
LCL [52:2]	0.0349112	0.00276166	0.0200586	0.0106021	0.00598386	0.00361008	0.00318228	0.0018457	0.00404441	0.00119303	0.00345248	0.00166925	0.0158767	0.00125588	0.0204999	0.00198705	0.00836759	0.00373396	0.00394299	0.00177861	0.00362076	0.00170733	0.00470082	0.00113791	0.0194287	0.00630351	0.0129124	0.00257799	0.00295292	0.00270514	0.00117981	0.000580143	0.00305903	0.000853766	0.00192395	0.00106363	0.0786799	0.000384994	7.81631e-05	5.89028e-05	7.21145e-05	0.0271133	0.0298918	0.000687103	0.000558613	0.000335191	0.172802	0.0141425	0.0075263
LCL [54:3]	0.03602	0.00328219	0.0229692	0.0116823	0.00642994	0.00471562	0.00331293	0.00142863	0.00355199	0.0010699	0.00221081	0.000869832	0.0218044	0.00257803	0.0275856	0.00201702	0.0127169	0.00499758	0.0053316	0.00345608	0.00455372	0.00085357	0.00390386	0.00111856	0.024634	0.00578658	0.0156008	0.00440512	0.0047401	0.00284808	0.00307486	0.00180476	0.00261516	0.000606703	0.00118537	0.00072688	0.135955	0.000873121	9.31583e-05	8.31035e-05	6.63297e-05	0.037692	0.0488587	0.00270424	0.00038783	0.000383703	0.0978302	0.0059149	0.00352387
LCL [54:2]	0.0179767	0.00479614	0.00900513	0.00569246	0.00213808	0.0019449	0.00070073	0.000370615	0.000927045	0.000680052	0.000932007	0.000199241	0.0144586	0.00171971	0.0182465	0.00252241	0.00669088	0.00285577	0.00313683	0.0017726	0.00284534	0.00129992	0.00223769	0.000724236	0.0110847	0.00327751	0.00542718	0.00114046	0.00112526	0.000497739	0.000425068	0.00046493	0.000603414	0.000232816	0.000362826	0.00039517	0.105116	0.00608455	0.00340034	0.00366228	0.00354567	0.0980807	0.0156571	0.00136227	0.000734401	0.000344322	0.0476464	0.0065002	0.00506567
LCL	0.0889079	0.00952526	0.0520329	0.0279489	0.0145519	0.0102104	0.00719594	0.00352647	0.00852345	0.00283658	0.0065953	0.0023279	0.0521397	0.00480537	0.0663321	0.00626901	0.0277753	0.0115335	0.0124114	0.00671515	0.0110198	0.00373566	0.0108424	0.00289804	0.0551474	0.0153638	0.0339403	0.00794281	0.00881828	0.00598415	0.00467973	0.00254816	0.00627761	0.0016577	0.00347215	0.00201881	0.0965586	0.000767964	0.000153843	0.000150633	0.000130126	0.0357998	0.0278496	0.00113319	0.000305032	0.000218252	0.100913	0.00823862	0.00495091
Sph [20:1:2]	0.0856605	0.0106815	0.126098	0.00281399	0.105964	0.0121228	0.0957521	0.0110343	0.0681108	0.00425552	0.0726004	0.00433999	0.100348	0.0266051	0.121443	0.0114805	0.116536	0.00602093	0.097446	0.00693368	0.0697981	0.00654698	0.0621562	0.00290877	0.0798881	0.0109309	0.141953	0.0116395	0.119327	0.0116799	0.107126	0.0141642	0.069187	0.00450499	0.0621789	0.00613623	0.00316807	0.0951171	0.318597	0.0573597	0.121277	0.275858	0.362075	0.863849	0.125638	0.0688272	0.00253607	0.0129483	0.0577722
Sph [20:0:2]	0.0747921	0.0154693	0.0858368	0.00459451	0.0769827	0.00435558	0.0693058	0.0160522	0.0535549	0.0159548	0.0571639	0.0147243	0.13977	0.140549	0.08142	0.00343702	0.0689362	0.00307505	0.0587786	0.00594365	0.0374471	0.00276499	0.0386037	0.0133003	0.0721733	0.0107632	0.108092	0.0156074	0.0780382	0.0140807	0.0839397	0.0183716	0.0651081	0.0298814	0.0591108	0.01461	0.301448	0.824961	0.691857	0.17322	0.226031	0.511985	0.432081	0.375105	0.275933	0.282358	0.0304573	0.597217	0.392694
Sph [20:0:3]	0.38687	0.0295513	0.843025	0.0934824	0.557584	0.02555	0.429189	0.035466	0.192926	0.0143533	0.198774	0.023497	0.423965	0.055504	0.855268	0.0598857	0.737748	0.0501444	0.529378	0.0502219	0.245483	0.0173062	0.21394	0.0155688	0.382728	0.06966	0.834809	0.0437578	0.607191	0.0588333	0.427466	0.0333689	0.258663	0.0341815	0.22929	0.0203959	0.00128763	0.00163333	0.187528	0.000515564	0.000991616	0.000792168	0.00190576	0.07127	0.00601681	0.00322468	0.0006801	0.0130136	0.37253
Sph	0.547323	0.0399556	1.05496	0.0935219	0.74053	0.0363638	0.594247	0.0594734	0.314591	0.0237035	0.328539	0.0337257	0.664082	0.215238	1.05813	0.0542031	0.923221	0.0554369	0.685602	0.0531863	0.352728	0.0265686	0.3147	0.00288453	0.53479	0.0878822	1.08485	0.0708122	0.804556	0.084292	0.618531	0.0653514	0.392958	0.0620001	0.35058	0.0374118	0.000984456	0.00345372	0.320014	0.000970966	0.00192396	0.0371133	0.113574	0.874647	0.067728	0.0482546	0.0010786	0.0185057	0.255977
Cer [38:1:2]	0.405366	0.0344093	0.452164	0.0398557	0.533782	0.0480413	0.574232	0.0319096	0.635501	0.086108	0.620867	0.0366319	0.365871	0.0220773	0.423924	0.0269585	0.486697	0.0441383	0.522672	0.0481401	0.640189	0.0345093	0.726734	0.0369244	0.375395	0.0168902	0.434242	0.0156576	0.500374	0.0810978	0.533927	0.0549679	0.515524	0.0476862	0.517945	0.0162969	0.198544	0.0197071	0.00337584	0.0126593	0.00175468	0.0447581	0.0132584	0.00684775	0.000315799	0.00013052	0.0114614	0.0592227	0.00880747
Cer [38:0:2]	0.138476	0.017975	0.695792	0.14919	0.579402	0.147822	0.391574	0.0859502	0.200129	0.0739671	0.280826	0.0199814	0.0895433	0.0119338	0.509404	0.0550483	0.683869	0.119146	0.666686	0.12285	0.632076	0.0980693	0.521221	0.0709245	0.128481	0.0226702	0.668315	0.104551	0.55365	0.17251	0.345158	0.109359	0.157948	0.0329177	0.241732	0.0243512	0.0030191	0.00684514	0.00753104	0.233311	0.000784047	0.000207578	0.00100601	0.00126338	0.000681968	0.000483481	0.000944305	0.0133441	0.0282964
Cer [38:0:3]	0.0939376	0.0116503	0.228674	0.0245185	0.237203	0.0400859	0.199201	0.0280045	0.0989712	0.0337099	0.0574688	0.00994267	0.0728492	0.00894201	0.179962	0.00637213	0.228438	0.020329	0.232049	0.0108886	0.209866	0.0100477	0.162985	0.0172031	0.0944471	0.00639438	0.233596	0.0223914	0.253617	0.0623294	0.212921	0.0517665	0.0905982	0.0330745	0.0768396	0.0080243	0.00100594	0.00401736	0.0038565	0.818912	0.0145634	7.19295e-05	0.000264654	4.02004e-05	6.06078e-05	0.00129147	0.000491881	0.0116911	0.0170441
Cer [44:0:3]	0.164232	0.008877	0.508426	0.0240396	0.460442	0.0277642	0.379082	0.0195105	0.289015	0.0453255	0.337402	0.00923482	0.159202	0.00954533	0.641759	0.0423991	0.973033	0.0569419	0.97314	0.0566981	0.906681	0.0487325	0.756284	0.0669343	0.134528	0.00768701	0.461038	0.0395666	0.397157	0.089819	0.268433	0.0698771	0.19856	0.0346489	0.286214	0.0175608	2.02351e-05	6.11932e-05	6.46132e-05	0.00945125	1.97189e-05	4.30824e-05	1.67005e-05	1.64169e-05	1.286e-05	0.000106557	0.000149711	0.00725126	0.0299553
Cer [44:0:4]	2.9846	0.248164	3.31634	0.318938	4.24935	0.522861	4.75286	0.472678	4.67272	0.208052	3.64609	0.525751	2.92834	0.309471	3.22708	0.410744	3.98747	0.281919	4.53653	0.424074	5.81115	0.655438	5.76737	0.715349	2.64351	0.167042	3.38775	0.152306	4.61319	0.66593	4.77176	0.55018	4.48227	0.33682	3.59602	0.184935	0.228122	0.0193523	0.00457319	0.000833474	0.120067	0.371276	0.0118556	0.00606346	0.00232756	0.0032275	0.00467445	0.00765642	0.00304141
Cer	3.78661	0.185026	5.2014	0.17903	6.06018	0.349146	6.29695	0.396834	5.89634	0.345976	4.94266	0.501033	3.61581	0.273567	4.98213	0.381807	6.35951	0.0874413	6.93107	0.225899	8.19996	0.550034	7.93459	0.741309	3.37636	0.150111	5.18494	0.314589	6.31798	1.04515	6.1322	0.780222	5.4449	0.456447	4.71875	0.199844	0.000680274	0.000569488	0.000577395	0.000739618	0.0199653	0.00729007	7.81284e-05	8.52514e-05	0.000206673	0.000694578	0.000848571	0.00848935	0.00386448
IPC [38:1:2]	0.140264	0.00982983	0.113266	0.00597403	0.101603	0.00593997	0.0955846	0.00814088	0.0925104	0.0129083	0.0894838	0.0244382	0.120281	0.00941617	0.0935855	0.00909112	0.081704	0.0121222	0.0638589	0.00497542	0.0595474	0.00855811	0.0510944	0.0091418	0.114007	0.0137243	0.106641	0.00641895	0.0915916	0.00401251	0.0828943	0.00558089	0.083019	0.00347064	0.0913198	0.0112208	0.0152825	0.00431173	0.00373582	0.00699313	0.0288607	0.0241711	0.012128	0.000783155	0.00116812	0.000798199	0.44718	0.0532486	0.0220173
IPC [44:0:3]	0.00764105	0.00622804	0.0209802	0.00602528	0.0257213	0.00353898	0.0248212	0.0079127	0.0115085	0.00579019	0.00797537	0.00529842	0.00756102	0.00308313	0.0351695	0.0097217	0.0550167	0.0168912	0.0523427	0.0155868	0.0595604	0.0120854	0.0518874	0.0120562	0.00529503	0.00234875	0.0158971	0.00501367	0.0292924	0.0019517	0.0246534	0.00249135	0.0126292	0.00416559	0.00949677	0.00134454	0.0560276	0.0119521	0.0417577	0.47492	0.946944	0.00938692	0.00873006	0.00815062	0.00195048	0.00350468	0.0294686	0.000168716	0.000609448
IPC [44:0:4]	0.2791	0.0247169	0.367618	0.0277606	0.449582	0.0656803	0.587998	0.0320857	0.637465	0.0393473	0.519935	0.0688828	0.322412	0.0242793	0.420782	0.0349812	0.518436	0.0145689	0.546937	0.00891182	0.646982	0.0456043	0.696957	0.0853871	0.250249	0.0388851	0.412691	0.038097	0.552683	0.100873	0.640718	0.0808849	0.708194	0.0900579	0.583982	0.0242951	0.0145554	0.0136116	0.000189735	0.000181598	0.00468198	0.0161126	0.000277246	0.000113992	0.000404936	0.00186482	0.00665909	0.00836728	0.00166071
IPC [44:0:5]	0.065768	0.0121945	0.0645668	0.0104041	0.0640799	0.0212494	0.0851663	0.0172959	0.108554	0.014897	0.101373	0.0141786	0.0604963	0.00702178	0.0719415	0.0075659	0.073715	0.0133776	0.0703157	0.018567	0.087914	0.0141433	0.0898889	0.0175803	0.0507786	0.0104493	0.0694127	0.00828137	0.0805751	0.00834249	0.0913838	0.00262753	0.122458	0.0093602	0.114606	0.0115239	0.902996	0.910755	0.187558	0.0183114	0.0299996	0.127201	0.204251	0.439858	0.0396503	0.0547002	0.0727076	0.0181509	0.0028452
IPC	0.492774	0.031584	0.566432	0.040328	0.640986	0.0780416	0.79357	0.0524399	0.850038	0.00959766	0.718768	0.0834851	0.510751	0.0346037	0.621478	0.0516344	0.728872	0.00561313	0.733455	0.0356877	0.854003	0.0795597	0.889828	0.115506	0.42033	0.0503648	0.604642	0.0307569	0.754142	0.109114	0.83965	0.0787992	0.926301	0.0935369	0.799405	0.0283129	0.0674405	0.038059	0.00104556	4.76803e-05	0.0118257	0.0367354	0.000420383	0.0014864	0.00237381	0.00552367	0.00565608	0.00857876	0.00148183
MIPC [44:0:3]	0.0542437	0.00678256	0.0517752	0.00872954	0.0404773	0.00759888	0.0415921	0.00997554	0.0271229	0.00516375	0.0163979	0.0114969	0.0535244	0.0106044	0.0616727	0.00994351	0.0580738	0.0146832	0.0492813	0.0174459	0.0413525	0.0136593	0.0367937	0.00729119	0.0433302	0.0125139	0.0477274	0.00910734	0.0526797	0.0102172	0.0428055	0.00868259	0.0282232	0.00866461	0.0148072	0.00604261	0.718627	0.0792942	0.143446	0.00529142	0.00798224	0.386602	0.685967	0.737067	0.289758	0.0874723	0.648439	0.372878	0.955281
MIPC [44:0:4]	5.38432	0.245795	5.14759	0.191545	4.88032	0.522456	5.73611	0.322914	5.9788	0.292762	5.42327	0.48917	5.04359	0.14516	5.24454	0.525583	5.25212	0.154633	4.88526	0.261449	4.78148	0.370322	4.45909	0.464778	4.34779	0.932246	5.29548	0.485241	5.74007	1.12634	5.87629	0.628259	6.10138	0.787227	5.48096	0.339177	0.258574	0.205094	0.207651	0.0544534	0.907884	0.557969	0.163787	0.411016	0.317399	0.106123	0.193352	0.174421	0.0780887
MIPC [44:0:5]	0.122242	0.0118059	0.115305	0.0124746	0.105606	0.0154248	0.125586	0.0143038	0.133404	0.00996507	0.112884	0.0252284	0.11031	0.00961828	0.121249	0.0141647	0.11196	0.0236563	0.10698	0.0208869	0.105964	0.0163973	0.0966021	0.0113905	0.118587	0.0277996	0.140925	0.0113765	0.148997	0.0224664	0.153951	0.00896568	0.147199	0.0176548	0.127892	0.0275348	0.522752	0.212126	0.770382	0.278981	0.591844	0.330549	0.916318	0.814286	0.712314	0.186458	0.267181	0.21459	0.104005
MIPC	5.56081	0.253486	5.31467	0.203962	5.0264	0.536959	5.90328	0.344548	6.13933	0.298521	5.55255	0.516549	5.20743	0.163134	5.42746	0.54554	5.42215	0.188385	5.04152	0.299335	4.92879	0.400127	4.59249	0.482597	4.5097	0.970735	5.48414	0.498008	5.94175	1.15797	6.07305	0.643423	6.2768	0.807146	5.62366	0.353219	0.260256	0.19404	0.237793	0.0627283	0.981352	0.53994	0.209867	0.446733	0.326607	0.104735	0.196781	0.176036	0.080688
DG [28:1]	0.0935314	0.00494545	0.0581529	0.00305717	0.050121	0.00382664	0.0469772	0.00210152	0.0431465	0.00152839	0.0370976	0.00313534	0.0904942	0.00338328	0.0652795	0.0113278	0.0590215	0.00590483	0.0502995	0.00395997	0.0328027	0.00561036	0.0258645	0.00385764	0.129607	0.0346237	0.0819169	0.0126153	0.0702217	0.0191395	0.0608649	0.00651719	0.0511773	0.00580388	0.0438557	0.00139323	0.000458411	0.000274243	0.000114904	7.25515e-05	7.54593e-05	0.0209423	0.00131754	0.000181148	0.000107768	2.61189e-05	0.0884727	0.0600526	0.0277996
DG [28:0]	0.15782	0.00377903	0.0799601	0.00124488	0.069676	0.0059074	0.0687776	0.00297615	0.0814732	0.00483142	0.0845925	0.00555536	0.1683	0.00185171	0.105738	0.0133921	0.104925	0.00625498	0.107044	0.00672727	0.0900664	0.0110789	0.085124	0.00764485	0.188181	0.0258218	0.101873	0.00794426	0.0850819	0.0150945	0.0788525	0.00446267	0.0765306	0.00777215	0.0688133	0.00415056	4.51995e-06	2.63387e-05	5.64124e-06	2.73814e-05	4.63773e-05	0.00131444	7.31052e-05	0.000109062	0.000270777	5.22787e-05	0.00521298	0.00395366	0.00194525
DG [30:1]	0.113991	0.0265236	0.0592379	0.00516956	0.0676093	0.0127887	0.0456314	0.00475241	0.0583252	0.00800224	0.0503139	0.0237042	0.0975113	0.00224853	0.0729811	0.0220746	0.0708764	0.0132831	0.0604626	0.00282708	0.0431266	0.00624885	0.0383384	0.00647179	0.127799	0.0341795	0.112469	0.0298833	0.0722061	0.015283	0.0688098	0.00508614	0.0636978	0.017695	0.0469707	0.00437916	0.0246843	0.0525386	0.0117456	0.0253488	0.0362042	0.128032	0.0266735	5.89933e-05	0.00014345	0.000116325	0.590054	0.0618608	0.0416889
DG [30:0]	0.0956852	0.020089	0.047051	0.00593826	0.0599162	0.00550555	0.0461783	0.00204679	0.0668457	0.00167453	0.0753905	0.0110042	0.0900564	0.00868211	0.0662273	0.0192963	0.0695244	0.0135954	0.0696489	0.0135228	0.0632974	0.0116107	0.0651156	0.011893	0.0925711	0.0186708	0.0863137	0.0176229	0.0521355	0.00791767	0.0562203	0.00380189	0.0598691	0.00769615	0.0463269	0.0116351	0.015849	0.0409703	0.0131955	0.0683644	0.199665	0.122875	0.0921805	0.0926976	0.0329985	0.0426547	0.694623	0.0259727	0.0298107
DG [32:1]	0.11217	0.0516313	0.0444036	0.0112281	0.0807102	0.0201102	0.042066	0.0122372	0.0835767	0.0220464	0.0834964	0.0422581	0.062212	0.0113476	0.0428384	0.0160424	0.064586	0.0301413	0.0459001	0.0166318	0.0388772	0.0145225	0.038036	0.0107312	0.0687993	0.0183777	0.14279	0.0561267	0.0556359	0.00738336	0.0625908	0.0119344	0.0783031	0.0302581	0.0469242	0.0174508	0.09047	0.381082	0.0840092	0.427516	0.498004	0.162883	0.904572	0.233207	0.0933804	0.0551648	0.0958133	0.31379	0.649316
DG [32:0]	0.0917107	0.0406779	0.0513765	0.016787	0.0884677	0.0150222	0.0643835	0.00871976	0.0955312	0.00834936	0.114958	0.00650425	0.070174	0.0160801	0.0703931	0.0174329	0.0838516	0.0233903	0.0697747	0.0296549	0.0657887	0.0233998	0.0785276	0.0349712	0.0584001	0.0141629	0.127645	0.0237292	0.065069	0.0200249	0.0692612	0.0164886	0.0839058	0.00459662	0.0552252	0.0332688	0.187582	0.903185	0.318754	0.881113	0.383686	0.988001	0.450877	0.984625	0.802294	0.726077	0.0122522	0.662219	0.435604
DG [34:1]	0.652931	0.0724877	0.436743	0.0225471	0.492721	0.0219317	0.492305	0.0211869	0.639809	0.104658	0.662579	0.078226	0.563825	0.0331569	0.495842	0.123938	0.480087	0.0402773	0.481714	0.028364	0.469252	0.073378	0.478606	0.0789186	0.57202	0.0983241	0.511098	0.0464565	0.461017	0.0448201	0.460948	0.0276151	0.515123	0.0779704	0.501002	0.00806587	0.00785827	0.0215027	0.0211309	0.866981	0.88308	0.410657	0.0498112	0.0310975	0.111664	0.15974	0.386826	0.149811	0.132707
DG [34:0]	0.0637945	0.0282548	0.0399581	0.0115035	0.0636407	0.0127841	0.0532703	0.00985998	0.0819473	0.0187294	0.0903113	0.0170399	0.0563162	0.0169099	0.0589688	0.0165829	0.0607798	0.0103523	0.0573573	0.0207209	0.0609166	0.0150817	0.0745253	0.0285757	0.0419339	0.00715179	0.0831135	0.0185911	0.0463357	0.0142098	0.0578852	0.0111358	0.0611989	0.00278094	0.0450673	0.0204291	0.247376	0.99356	0.575342	0.406159	0.236334	0.855639	0.716462	0.949478	0.742835	0.395974	0.0231529	0.656773	0.105115
DG [36:2]	2.57312	0.179784	2.19036	0.033935	1.94021	0.198616	2.02991	0.0432884	2.26889	0.2568	2.23602	0.168596	2.63014	0.102009	2.6643	0.162793	3.00049	0.102787	3.08919	0.0212135	2.77947	0.262395	2.69125	0.296659	2.85795	0.666801	2.27979	0.267498	2.1379	0.44619	2.14225	0.311186	2.09669	0.275431	2.04986	0.0879598	0.0222866	0.0149517	0.00704193	0.168067	0.0769079	0.773462	0.0114257	0.00158362	0.410227	0.752783	0.235817	0.195049	0.167339
DG [36:1]	0.613289	0.0564793	0.735205	0.0626959	0.826315	0.153897	0.995299	0.0774909	1.37457	0.355545	1.13123	0.0981741	0.744209	0.0886592	1.49577	0.0500844	2.33081	0.0791687	2.96834	0.0889989	3.56338	0.484766	3.42126	0.430407	0.562819	0.067477	0.790755	0.0995748	0.831874	0.0861718	0.892803	0.0625606	0.88716	0.162967	0.679885	0.0150157	0.0665929	0.0875735	0.00231315	0.0215289	0.00137499	0.000215781	2.074e-05	6.73715e-06	0.000582369	0.000456379	0.0304378	0.0130754	0.00341855
DG	4.56804	0.401102	3.74245	0.139919	3.73939	0.315129	3.8848	0.12777	4.79412	0.722606	4.56599	0.404947	4.57324	0.233022	5.13834	0.202576	6.32495	0.239593	6.99973	0.210649	7.20698	0.896032	6.99665	0.852847	4.70008	0.973694	4.31776	0.370127	3.87748	0.591213	3.95048	0.393829	3.97365	0.57164	3.58393	0.0361348	0.0281431	0.048132	0.0482579	0.660347	0.995329	0.0338588	0.000816304	0.000180458	0.00788866	0.00898622	0.559523	0.279188	0.284035
TG [44:2]	0.157038	0.00890084	0.154539	0.00982574	0.156848	0.0177817	0.144954	0.0121411	0.166412	0.0123796	0.187194	0.0304473	0.117225	0.00951411	0.122366	0.00619074	0.141032	0.0199217	0.125947	0.00151384	0.116452	0.0190257	0.120275	0.0167983	0.117305	0.0143403	0.149539	0.0164287	0.143733	0.00858407	0.140735	0.0103467	0.144297	0.0222261	0.145591	0.010715	0.760414	0.987579	0.236805	0.346969	0.174996	0.476633	0.135186	0.19193	0.952791	0.797902	0.062627	0.0519701	0.0834097
TG [44:1]	0.245153	0.0346617	0.263978	0.00802707	0.327453	0.0333286	0.309389	0.0146307	0.370671	0.0324235	0.375259	0.0956396	0.164827	0.0292872	0.206697	0.0113116	0.287671	0.055866	0.260843	0.00794319	0.271168	0.0478474	0.279504	0.0405067	0.152945	0.0132713	0.275116	0.0513593	0.274042	0.0153071	0.298635	0.0185551	0.313716	0.0480964	0.276905	0.0303481	0.411279	0.0413711	0.0416676	0.0101796	0.091093	0.0820435	0.0279608	0.00539719	0.0304078	0.0164875	0.016277	0.000491262	0.000379835
TG [44:0]	0.170715	0.0171682	0.10464	0.00213933	0.140926	0.0140209	0.122303	0.0133644	0.199758	0.0255925	0.229682	0.0577275	0.134424	0.0211727	0.0852036	0.00118683	0.118612	0.0380366	0.102396	0.00401699	0.13965	0.0253658	0.178189	0.0208029	0.10826	0.00976294	0.124633	0.0450876	0.100926	0.000779019	0.118953	0.0186075	0.149986	0.031313	0.13769	0.0201725	0.00270778	0.0804539	0.0182399	0.177947	0.165158	0.0158612	0.563405	0.0617035	0.797711	0.063051	0.57198	0.264413	0.427885
TG [46:2]	0.328465	0.0653108	0.559388	0.0403465	0.657538	0.0613087	0.680702	0.0526409	0.681129	0.0541888	0.577431	0.0833547	0.221966	0.0366572	0.464986	0.0281875	0.654611	0.0921442	0.651616	0.051282	0.634595	0.0997816	0.579963	0.0627996	0.22369	0.00816936	0.614601	0.0417028	0.720295	0.0658785	0.799858	0.0261741	0.718145	0.0589323	0.567558	0.0468154	0.00647117	0.00312763	0.00189866	0.00197445	0.0151953	0.000807812	0.00164358	0.000294661	0.00254889	0.00103775	9.07078e-05	0.000204665	3.40218e-06
TG [46:1]	0.648584	0.0617924	0.714332	0.0088771	0.846581	0.0947495	0.856074	0.0391696	1.01978	0.0849095	0.954824	0.16017	0.506073	0.0608105	0.646898	0.0163731	0.893959	0.128013	0.895045	0.0507094	1.05758	0.131747	1.08542	0.083067	0.492665	0.074393	0.757904	0.132396	0.81834	0.0312504	0.88154	0.0601994	0.949149	0.104528	0.782411	0.0825298	0.142184	0.0387158	0.00797381	0.00360531	0.0365861	0.0179457	0.00903383	0.00104644	0.0027568	0.000620507	0.0389677	0.002203	0.00214783
TG [46:0]	0.294253	0.016912	0.184589	0.00296248	0.2332	0.0266395	0.223074	0.0104311	0.371208	0.036532	0.400826	0.072066	0.279791	0.0361657	0.178908	0.00438312	0.241812	0.0515512	0.251853	0.0104274	0.43659	0.0481376	0.58223	0.0407871	0.206235	0.00330253	0.213359	0.0620902	0.177702	0.00565387	0.223036	0.0406885	0.296153	0.0383085	0.251016	0.0358366	0.00037964	0.0285348	0.00343234	0.0296271	0.0672217	0.00867093	0.355175	0.267949	0.0107347	0.000655548	0.852365	0.00165089	0.515305
TG [48:2]	0.407462	0.130271	0.457905	0.0288178	0.678232	0.0223665	0.588606	0.0309921	0.661916	0.0400631	0.59177	0.177845	0.24578	0.0689677	0.420597	0.0311921	0.674637	0.144747	0.639519	0.0330283	0.646188	0.127697	0.598202	0.101212	0.228418	0.0242827	0.560429	0.0714178	0.645156	0.0232379	0.717478	0.0593004	0.684418	0.117515	0.504197	0.084819	0.548314	0.0238377	0.0791138	0.031864	0.221166	0.0161266	0.0097872	0.000873877	0.00878444	0.00757616	0.00158965	2.7803e-05	0.000189212
TG [48:1]	0.477835	0.112503	0.332688	0.0203063	0.534523	0.0162106	0.421429	0.0491982	0.613926	0.0581954	0.620148	0.206591	0.328737	0.0790431	0.316282	0.0111955	0.523821	0.15717	0.48144	0.014934	0.609924	0.119627	0.633706	0.0852018	0.270603	0.0194363	0.394579	0.0737602	0.406497	0.0113112	0.481499	0.0791292	0.551853	0.131987	0.430926	0.0971064	0.0927459	0.436404	0.470779	0.136247	0.353846	0.800355	0.127176	0.0302728	0.02736	0.0104572	0.0480652	0.000470906	0.0109643
TG [48:0]	0.165254	0.0345013	0.0902445	0.00838801	0.144326	0.0136538	0.114684	0.0141069	0.199331	0.0302036	0.217328	0.0499824	0.147236	0.0379862	0.0862387	0.000465594	0.130554	0.0451921	0.125383	0.0104475	0.191333	0.0277236	0.246408	0.0157194	0.101884	0.0134861	0.117182	0.026211	0.100408	0.00934605	0.131086	0.0438905	0.157233	0.0296401	0.12519	0.029532	0.0215976	0.383926	0.0785215	0.267467	0.211703	0.0497631	0.650152	0.391069	0.179671	0.0139376	0.419523	0.883717	0.332484
TG [50:3]	0.142974	0.0690699	0.0509113	0.0110161	0.156667	0.0369866	0.0695167	0.0343788	0.129228	0.0186188	0.142994	0.0907837	0.0672624	0.0313501	0.0370389	0.00276342	0.100865	0.0657714	0.0719807	0.0344202	0.0666455	0.0346004	0.0651274	0.0414554	0.0489926	0.00469664	0.0969542	0.0381426	0.0729137	0.00722474	0.0810695	0.0212382	0.11572	0.0883101	0.0762364	0.0473247	0.0848034	0.777206	0.174475	0.755983	0.999769	0.171574	0.46915	0.869188	0.982838	0.946696	0.096715	0.00859697	0.0630198
TG [50:2]	0.411	0.10058	0.249488	0.0196059	0.46463	0.0387778	0.337213	0.0676085	0.488328	0.0304318	0.521406	0.188335	0.212085	0.0789414	0.181026	0.0071537	0.370825	0.168389	0.300332	0.0431379	0.294781	0.0856938	0.27535	0.0812424	0.164744	0.0146609	0.307768	0.0762054	0.310007	0.0219715	0.338631	0.0531686	0.431673	0.157062	0.339529	0.102364	0.0524444	0.437443	0.351109	0.271469	0.42107	0.534567	0.213377	0.164531	0.286316	0.388159	0.0331464	0.000678202	0.00546725
TG [50:1]	0.411761	0.094229	0.212788	0.00873377	0.334767	0.0172689	0.278179	0.0417622	0.475914	0.0544164	0.550168	0.119372	0.228186	0.058213	0.160805	0.00421385	0.293403	0.128137	0.241084	0.0143086	0.28423	0.0645869	0.301436	0.0453564	0.176089	0.022907	0.229557	0.0436437	0.24874	0.0431342	0.276536	0.0469208	0.386944	0.0870056	0.344862	0.0553004	0.0219301	0.236304	0.0881497	0.36491	0.190083	0.116167	0.467179	0.728299	0.326786	0.160699	0.133457	0.0615542	0.0290506
TG [50:0]	0.0736356	0.021301	0.0439858	0.00366941	0.0684341	0.0141846	0.0638113	0.00243499	0.110521	0.0312493	0.11093	0.0150383	0.0677583	0.0134703	0.0490932	0.000372156	0.0687028	0.0163425	0.0713639	0.00777707	0.109513	0.0133884	0.14418	0.00247874	0.0429225	0.00111774	0.0551746	0.0115471	0.0495652	0.0046185	0.0681953	0.0167018	0.0786286	0.00708529	0.0702509	0.016137	0.0763273	0.742571	0.471807	0.166429	0.0684032	0.0744288	0.94214	0.708577	0.0189734	0.000641342	0.141353	0.0726646	0.0591064
TG [52:3]	0.385253	0.04785	0.467344	0.0102369	0.630306	0.0348733	0.65578	0.0326428	0.71892	0.0434405	0.676382	0.0620214	0.214637	0.0622121	0.372714	0.00416895	0.641864	0.127224	0.608864	0.00975771	0.605839	0.0982424	0.549308	0.0557858	0.173256	0.0199455	0.444438	0.0531667	0.565019	0.0857637	0.591936	0.0344243	0.670009	0.108987	0.520558	0.0746921	0.0438641	0.00200489	0.00126911	0.000864884	0.00299602	0.0117718	0.00640517	0.000410489	0.00432097	0.00226754	0.0011658	0.00152594	5.32843e-05
TG [52:2]	1.2077	0.174645	1.51193	0.062394	1.66123	0.334179	2.24144	0.157576	3.18352	0.442675	3.55908	0.419513	0.904334	0.0756926	1.09197	0.0753266	1.57865	0.160873	1.71341	0.185671	2.14162	0.178234	2.23448	0.131655	0.737175	0.0617253	1.07566	0.017071	1.49965	0.188881	1.78492	0.0625021	2.54634	0.266421	2.89923	0.0876451	0.0468028	0.10563	0.00159885	0.00198109	0.000857462	0.0382772	0.00277852	0.00220494	0.000379089	0.000110064	0.000790383	0.0026609	3.24327e-05
TG [52:1]	0.523196	0.0686528	0.495123	0.0374884	0.566816	0.127476	0.841783	0.0764768	1.59434	0.244672	1.90603	0.295485	0.489772	0.0347743	0.419404	0.0408612	0.615322	0.057415	0.75965	0.0794291	1.45893	0.125997	2.03454	0.225468	0.348097	0.0294163	0.3662	0.00519955	0.477191	0.0523314	0.619951	0.0154496	1.06851	0.118861	1.17798	0.0412595	0.567867	0.629358	0.00581008	0.00187163	0.00139175	0.0855801	0.0316848	0.00572639	0.000211929	0.000302311	0.353129	0.0203923	0.000143957
TG [52:0]	0.0610239	0.0110694	0.0411117	0.00400148	0.0505209	0.0119804	0.063711	0.0114099	0.112368	0.0423765	0.105334	0.0192889	0.0672985	0.00915859	0.0566961	0.00667416	0.0780642	0.00965296	0.0975891	0.0137951	0.165021	0.00546779	0.21461	0.0136247	0.0443904	0.00884527	0.0511939	0.0117649	0.0481636	0.00525291	0.068767	0.00769333	0.0894269	0.00909081	0.0812582	0.0177206	0.0428082	0.327213	0.784255	0.112152	0.0260312	0.180446	0.233731	0.0339077	9.21768e-05	0.000100052	0.468219	0.559766	0.0227251
TG [54:3]	2.6632	0.357106	6.26548	0.226502	6.51789	1.70707	9.4674	1.14893	10.9891	1.62772	10.7134	2.13037	2.71197	0.0489704	6.11587	0.121996	8.15079	1.22947	9.80491	1.47015	11.7234	0.58777	11.9431	0.290341	2.49168	0.312783	4.99923	0.504809	7.83084	0.432882	9.01862	0.337306	10.4213	1.49221	10.5872	0.564831	0.000122824	0.0186461	0.000608825	0.000980915	0.00296544	1.47812e-06	0.0015642	0.0011236	1.21185e-05	6.88496e-07	0.00185932	6.52801e-05	1.62688e-05
TG [54:2]	2.5281	0.499181	3.20278	0.395437	3.35116	1.13203	5.92392	0.861649	9.47698	1.81697	9.99961	2.02358	3.25463	0.191669	3.89082	0.0685214	6.28353	1.12041	8.97969	1.28158	16.3324	0.920444	20.6221	1.72972	2.34602	0.472205	2.07025	0.29347	3.40584	0.181427	4.68823	0.279938	7.51825	1.52205	7.48944	0.309197	0.140413	0.313392	0.00411224	0.00308328	0.00342345	0.00564118	0.00991553	0.0015671	1.76061e-05	6.57409e-05	0.438708	0.0221834	0.00178768
TG [54:1]	0.442463	0.0830254	0.546484	0.0639784	0.728586	0.199139	1.34017	0.201972	2.41748	0.376154	2.71849	0.574501	0.595198	0.0292124	0.699269	0.229392	1.48127	0.125035	2.55731	0.299656	10.3412	0.577085	15.3042	1.44466	0.483233	0.175866	0.420241	0.0562706	0.735468	0.0443342	1.02446	0.0487178	1.59392	0.201774	1.36914	0.0834804	0.160757	0.0832166	0.00205638	0.000888295	0.00245477	0.479227	0.000280761	0.000351021	8.17347e-06	6.07759e-05	0.586377	0.0736482	0.0068059
TG [56:3]	0.0917915	0.00814873	0.131489	0.00601225	0.134188	0.0228472	0.186758	0.0315968	0.209352	0.0269177	0.21129	0.0378932	0.0944261	0.0053062	0.114247	0.0283912	0.157176	0.017482	0.182762	0.0270051	0.214399	0.014521	0.228305	0.00611222	0.0876353	0.0137152	0.113961	0.0233491	0.15065	0.0302144	0.166624	0.0279588	0.210216	0.0253551	0.21981	0.018738	0.00245683	0.038884	0.00727758	0.00193138	0.00592508	0.300332	0.00400578	0.00512544	0.000177246	8.83538e-06	0.167494	0.0302348	0.0117532
TG [56:2]	0.122158	0.00901955	0.144439	0.00577312	0.163676	0.0294816	0.240336	0.0295344	0.331692	0.0407253	0.355028	0.0609421	0.128471	0.00826758	0.1543	0.0300528	0.244218	0.0322725	0.325262	0.0442181	0.594965	0.0379427	0.799854	0.0465916	0.11009	0.00609502	0.127368	0.0183715	0.165622	0.0214903	0.211274	0.0414114	0.282732	0.0247289	0.279092	0.0179958	0.0226821	0.080036	0.00268743	0.000960797	0.0028135	0.224529	0.00384063	0.00162672	3.15259e-05	1.62707e-05	0.196979	0.0125863	0.0138402
TG [56:1]	0.0638912	0.0100001	0.0547487	0.0053585	0.0849431	0.0108553	0.108895	0.00799935	0.179778	0.0250693	0.191997	0.0202461	0.0583003	0.0094431	0.0771218	0.00971931	0.124784	0.0155739	0.179155	0.0188298	0.392328	0.0180294	0.579245	0.0520497	0.0501663	0.00992795	0.0732134	0.0218128	0.0701256	0.00560129	0.093217	0.0170223	0.12996	0.0113288	0.118084	0.0124844	0.235275	0.0689109	0.00368304	0.00174577	0.000601451	0.073901	0.00320193	0.000575887	9.11372e-06	6.92879e-05	0.171113	0.0386763	0.0193697
TG [58:3]	0.0371213	0.00154757	0.0390155	0.00294359	0.04236	0.00654265	0.0483063	0.00403098	0.0562543	0.00687072	0.0515251	0.00519005	0.0387066	0.00520657	0.0418066	0.00338594	0.0536643	0.00806079	0.0539874	0.00741109	0.0652795	0.00349081	0.0692386	0.00456105	0.0254613	0.0106013	0.0361814	0.00151403	0.0396383	0.00647622	0.0486107	0.00157737	0.0542247	0.00547846	0.0515051	0.00195243	0.379724	0.248468	0.0109335	0.00927131	0.00998204	0.436061	0.0541052	0.0431471	0.001832	0.00157661	0.157969	0.119265	0.0201039
TG [58:2]	0.0839145	0.00639003	0.112545	0.0118079	0.129479	0.0296612	0.182631	0.0219224	0.252092	0.0374959	0.262663	0.0374987	0.0946765	0.00466215	0.125002	0.0284696	0.20124	0.02717	0.277649	0.0427231	0.493864	0.0290787	0.658991	0.0222918	0.0797988	0.0130228	0.0986474	0.00202947	0.132501	0.00914565	0.160869	0.00101887	0.214029	0.0195512	0.211892	0.00462909	0.0209544	0.0599825	0.00170127	0.00156247	0.00123988	0.142759	0.00258858	0.00180238	1.95124e-05	1.76207e-06	0.0684302	0.00457496	0.000424545
TG [58:1]	0.0706223	0.00467019	0.0753312	0.0108751	0.10412	0.021188	0.160938	0.0209106	0.29574	0.0536155	0.341913	0.0577128	0.0774585	0.00663119	0.0980855	0.0120619	0.173559	0.0219125	0.257947	0.0329724	0.540133	0.0162202	0.763291	0.0862235	0.0647706	0.0187004	0.079174	0.0099172	0.0974028	0.00689963	0.126871	0.00494521	0.211195	0.018291	0.225603	0.0121275	0.528637	0.0555646	0.00187132	0.00192644	0.00125371	0.0603284	0.00190108	0.000745357	1.36739e-06	0.000162731	0.303889	0.0470782	0.00512125
TG [60:3]	0.059689	0.00544416	0.0727401	0.00756411	0.0698816	0.0149086	0.0937065	0.00847149	0.11266	0.0187965	0.114501	0.013577	0.0710167	0.00370083	0.0738996	0.0172149	0.104958	0.0144639	0.117791	0.0206845	0.148718	0.0129697	0.159477	0.00670321	0.0558153	0.0113165	0.0638301	0.00256227	0.083392	0.00569892	0.0915467	0.00211683	0.117235	0.00908537	0.120362	0.00208557	0.0723273	0.328347	0.00425648	0.0093884	0.00290631	0.790804	0.0169937	0.0182163	0.000566719	3.6808e-05	0.297597	0.0196089	0.00578542
TG [60:2]	0.227214	0.0360782	0.325153	0.0395857	0.35498	0.10082	0.619646	0.112708	1.05855	0.235522	1.17929	0.237705	0.302678	0.00638597	0.42863	0.154232	0.806901	0.165832	1.22886	0.214988	2.26005	0.131592	3.10329	0.148334	0.277411	0.0746111	0.267107	0.0337881	0.432078	0.032815	0.577216	0.0130511	0.97483	0.163262	1.02644	0.0285789	0.0339491	0.10764	0.00455369	0.00378158	0.00236583	0.230461	0.00624379	0.00172665	1.35463e-05	5.23306e-06	0.838185	0.0303103	0.00236984
TG [60:1]	0.0636182	0.00674199	0.0816531	0.0120591	0.116574	0.0294624	0.222441	0.0436487	0.449615	0.115311	0.51176	0.117391	0.0897625	0.000605593	0.150073	0.0478997	0.353581	0.0694515	0.64006	0.0978129	1.40953	0.217277	1.80224	0.287727	0.104511	0.0582046	0.079603	0.0100536	0.133463	0.00958112	0.193111	0.00349961	0.330856	0.0574182	0.32	0.0168815	0.0865862	0.0386013	0.00338413	0.00442786	0.00272873	0.0946766	0.00276304	0.000621218	0.000461606	0.000499538	0.505628	0.443156	0.058077
TG [62:2]	0.0190446	0.00306134	0.0213176	0.0042662	0.0270865	0.00707447	0.0408849	0.00395974	0.0619947	0.0094704	0.0715349	0.0117634	0.0189339	0.00319691	0.030467	0.00656228	0.0506808	0.00636309	0.0708724	0.0105246	0.111558	0.00368771	0.149565	0.0076823	0.0202852	0.00236434	0.0296172	0.0149405	0.0271175	0.00133586	0.0402906	0.00607442	0.0593671	0.00241381	0.0589875	0.00425931	0.495082	0.145056	0.00164238	0.00171286	0.00170839	0.0520875	0.00151431	0.00121715	5.1075e-06	1.08769e-05	0.345466	0.0120835	0.00602242
TG [62:1]	0.00287599	0.00131793	0.00327973	0.00201824	0.00685445	0.00214695	0.0129996	0.00358383	0.0316579	0.0097949	0.0388369	0.00599402	0.00348679	0.00151644	0.00905824	0.00250417	0.0260326	0.00459597	0.0431372	0.00567716	0.0821492	0.0121878	0.1042	0.0166742	0.00659229	0.00134347	0.00535386	0.000551054	0.00766357	0.00157864	0.0107436	0.00311224	0.0229642	0.00287318	0.0234254	0.000927784	0.786146	0.0521543	0.0100912	0.00726107	0.000530719	0.0300375	0.00128144	0.000306479	0.000375588	0.000479386	0.213682	0.421321	0.101214
TG [64:2]	0.00477628	0.00286471	0.00903439	0.00405098	0.0114711	0.0040583	0.0178428	0.00802747	0.0361372	0.00838386	0.0373019	0.00775346	0.00375592	0.00103736	0.0171863	0.00302008	0.034646	0.00573953	0.0481038	0.00675058	0.0754881	0.00121069	0.102087	0.00409627	0.00490252	0.00434792	0.00801882	0.00332054	0.0111633	0.00649343	0.0191455	0.00361685	0.0302582	0.0049933	0.0347389	0.00137585	0.211349	0.0798728	0.0566677	0.00358668	0.00242238	0.00188723	0.000784168	0.000356044	1.62512e-07	2.26415e-06	0.379691	0.237546	0.0120436
TG [64:1]	5.61935e-05	9.73299e-05	0	0	0	0	0	0	0.00853673	0.00474089	0.0131781	0.00502317	0.000148611	0.000257401	0.000191193	0.000331156	0.0066913	0.00196511	0.0181945	0.00172199	0.0389085	0.012762	0.0476705	0.00999577	0.000823272	0.00102312	6.49003e-05	0.000112411	0	0	0	0	0.00335296	0.00300747	0.00217503	0.000372682	0.373901	0.373901	0.373901	0.0363036	0.0106278	0.868959	0.00462871	5.6595e-05	0.006257	0.00118744	0.270957	0.235844	0.235844
TG [66:2]	0.00105029	0.000986234	0.00711912	0.00329293	0.00514583	0.00264585	0.0081143	0.00340105	0.0167282	0.00443266	0.0197642	0.00257167	0.00162155	0.000697801	0.00981279	0.00159522	0.0211655	0.00573614	0.0297845	0.00477538	0.0439952	0.00237554	0.0560296	0.00301542	0.00232523	0.00246498	0.00380584	0.00334088	0.00526632	0.00466041	0.00720663	0.00278688	0.0147286	0.00440816	0.0225518	0.000902549	0.037734	0.0659019	0.0259322	0.00393062	0.000298313	0.00123444	0.00423749	0.000539205	7.71214e-06	6.93176e-06	0.570216	0.388644	0.0854965
TG [66:1]	0.000319752	0.000542015	0	0	0.000367285	0.000426403	0.00192363	0.00208077	0.0117599	0.0063443	0.017708	0.00366144	0.000607295	0.000529622	0.000306621	0.000531084	0.00546415	0.00104961	0.016599	0.0032363	0.0358994	0.0108206	0.0483568	0.00978201	0.00252252	0.00265064	0	0	9.77231e-05	0.000169261	0.00107053	0.000927226	0.00824056	0.00342519	0.0105209	0.00109479	0.364647	0.910729	0.26596	0.0358049	0.00124111	0.525684	0.00201876	0.00107634	0.00485748	0.00107825	0.17463	0.188978	0.4211
TG	12.5932	0.834392	17.0276	0.862088	19.5018	3.99154	26.6896	2.23716	37.0934	5.53576	38.5766	5.17756	11.9432	0.640874	16.9331	0.743672	25.6948	2.92174	32.2304	3.81873	54.1343	2.96177	66.6642	3.75721	9.85171	1.02962	14.3099	0.324966	19.9867	0.952684	24.1019	0.736652	31.5499	3.29765	30.9024	0.816797	0.00305776	0.0426263	0.000515472	0.00162433	0.0010129	0.000918428	0.00134757	0.000817445	1.75395e-05	1.55238e-05	0.00202237	0.000234576	4.08123e-05
EE [18:1]	18.5156	4.2177	24.9616	2.72035	27.4268	2.79394	26.7304	0.749896	27.3212	4.34939	28.2755	3.00835	19.3523	2.45093	23.5359	2.59721	24.5558	5.09918	27.5956	5.23365	30.3405	2.08727	29.7672	0.76117	19.4637	5.05085	21.9438	3.33786	25.1737	1.53604	23.4979	4.51517	26.3208	4.06502	26.0948	3.64744	0.0901535	0.0379968	0.0293394	0.0655386	0.0309919	0.112319	0.186374	0.0689026	0.00409849	0.00215846	0.51716	0.134307	0.360638
EE	18.5156	4.2177	24.9616	2.72035	27.4268	2.79394	26.7304	0.749896	27.3212	4.34939	28.2755	3.00835	19.3523	2.45093	23.5359	2.59721	24.5558	5.09918	27.5956	5.23365	30.3405	2.08727	29.7672	0.76117	19.4637	5.05085	21.9438	3.33786	25.1737	1.53604	23.4979	4.51517	26.3208	4.06502	26.0948	3.64744	0.0901535	0.0379968	0.0293394	0.0655386	0.0309919	0.112319	0.186374	0.0689026	0.00409849	0.00215846	0.51716	0.134307	0.360638
Lipid classes
LPC	1.487	0.183732	1.14064	0.202068	0.742183	0.163938	0.609779	0.0207683	0.506452	0.161309	0.431068	0.0324282	1.19052	0.0479792	1.21534	0.169107	0.957649	0.143249	0.791638	0.148273	0.370173	0.0604675	0.227079	0.0330241	1.52419	0.407383	1.2161	0.215378	0.83514	0.274485	0.674624	0.132884	0.551065	0.0936273	0.533046	0.0365104	0.0930009	0.0063441	0.00119543	0.00225614	0.00060701	0.818791	0.0558136	0.0113938	5.12482e-05	8.83407e-06	0.311292	0.0720131	0.0264385
PC	29.1487	1.53267	29.9259	1.19827	30.2251	3.65384	31.8783	0.755288	32.8595	2.06677	35.7073	3.9104	31.5064	0.938385	29.1965	1.30747	30.7056	1.60741	32.333	1.20542	33.078	2.2293	36.0118	2.99846	31.0172	0.917769	30.0331	0.730576	31.0597	2.76965	31.9208	2.09238	32.5087	1.0253	35.1366	1.42254	0.527039	0.662468	0.0504879	0.0669134	0.0538302	0.0677794	0.497592	0.401689	0.323354	0.0679382	0.219829	0.981096	0.531004
LPE	1.00216	0.0950285	0.525233	0.0959714	0.342212	0.0427581	0.260369	0.0250348	0.266216	0.0151392	0.284889	0.0409289	0.894846	0.108313	0.683267	0.0559691	0.408646	0.0515476	0.311209	0.037582	0.167628	0.0236004	0.132865	0.00246191	1.16942	0.299256	0.581542	0.0624732	0.32504	0.0705227	0.275559	0.0220613	0.237923	0.0254882	0.278604	0.0381805	0.00361824	0.000392401	0.000197571	0.000187666	0.000275785	0.0397138	0.00216835	0.000912957	0.000342109	0.000260642	0.0290849	0.00892574	0.0067001
PE	11.1717	0.0938905	9.67052	0.284864	9.4392	0.408149	8.53945	0.056793	8.69206	0.122824	9.00581	0.816076	11.1855	0.120805	9.70879	0.0645468	9.14294	0.216467	8.68184	0.200614	7.71804	0.48086	6.99908	0.685204	11.4735	0.463795	9.86687	0.411399	8.9916	0.337532	8.83498	0.207422	8.85427	0.385451	8.63107	0.375368	0.000974433	0.00200863	2.00562e-06	9.98765e-06	0.010286	4.84103e-05	0.000140023	5.00498e-05	0.000266451	0.000478859	0.0109177	0.00169583	0.000845638
DMPE	1.28686	0.156353	0.704775	0.0919178	0.550112	0.0540451	0.383634	0.0228345	0.319373	0.012863	0.443524	0.0571127	1.47507	0.241455	0.711684	0.100833	0.482391	0.0469348	0.403439	0.0413646	0.262849	0.0174733	0.241489	0.0336432	2.04323	0.76808	0.838765	0.174548	0.613918	0.0999437	0.507176	0.0908712	0.564862	0.0989805	0.682152	0.115983	0.00512744	0.00152034	0.000584133	0.000435169	0.000929893	0.00721498	0.00220382	0.00162692	0.000972554	0.000934315	0.0570658	0.0330198	0.0262967
MMPE	0.480251	0.0509453	0.281674	0.00948381	0.235863	0.00984223	0.174495	0.0165313	0.148793	0.0142174	0.198775	0.0358323	0.548724	0.0927856	0.283945	0.0224705	0.246996	0.00701027	0.221726	0.0200626	0.182619	0.0326486	0.160568	0.0192842	0.660645	0.131552	0.3384	0.054232	0.287311	0.0431017	0.246975	0.0384439	0.278873	0.0526216	0.308811	0.0366025	0.00267408	0.00122895	0.000587125	0.000408853	0.00143823	0.00862405	0.00493947	0.00396356	0.00297957	0.00208493	0.0172109	0.00951049	0.00639309
LPI	0.658824	0.0779647	0.499655	0.0847878	0.385757	0.0993765	0.311773	0.0464289	0.291932	0.0133407	0.250704	0.025927	0.500726	0.0924535	0.564094	0.125056	0.411238	0.0977717	0.360861	0.0927953	0.232066	0.0681373	0.147446	0.0353382	0.643073	0.0711534	0.550041	0.0862101	0.386874	0.0451593	0.402162	0.0623804	0.358169	0.0188751	0.457439	0.0636935	0.074886	0.0200427	0.00269348	0.00130267	0.00100304	0.51928	0.313536	0.138087	0.0154544	0.00347837	0.222882	0.006231	0.0116035
PI	35.2851	1.53529	36.2409	1.13558	35.9781	2.46141	34.9375	0.218863	34.4182	0.96625	33.9258	1.37906	33.8659	0.505665	36.218	0.418435	35.9255	1.38368	35.6988	0.897746	35.376	1.54368	34.3012	1.21845	34.5343	1.92142	36.1344	0.676386	34.863	0.556427	34.7988	0.391564	35.1936	0.430005	35.3953	0.857391	0.434881	0.700264	0.717644	0.454382	0.317618	0.0034277	0.0726487	0.0368931	0.182653	0.598256	0.245284	0.790083	0.826769
LPS	0.377799	0.11821	0.307564	0.10983	0.227628	0.102717	0.14582	0.0493881	0.110967	0.0167162	0.101623	0.0274908	0.316553	0.12867	0.377263	0.0948124	0.281344	0.125241	0.195119	0.0622221	0.090815	0.0174231	0.0638304	0.014848	0.277796	0.0931362	0.238104	0.0641129	0.13401	0.0339438	0.107038	0.0281707	0.0724285	0.00869802	0.0740287	0.0195018	0.492844	0.172067	0.034972	0.0179754	0.0169394	0.546536	0.75122	0.215097	0.0395025	0.0277975	0.576008	0.0658933	0.0384179
PS	7.00355	0.194432	7.52564	0.330368	8.08609	0.513891	7.50537	0.0757955	6.75633	0.517808	5.69147	0.753205	6.84785	0.301154	7.77821	0.245756	6.68627	0.353405	6.1768	0.335467	6.24967	0.22998	6.10197	0.143842	6.15556	0.407408	6.72173	0.245086	7.17541	0.847267	6.83557	0.606252	6.03772	0.341436	4.97322	0.0583709	0.0777463	0.0269632	0.0140871	0.48205	0.0431806	0.0143101	0.579182	0.061443	0.0522156	0.0179791	0.108138	0.133448	0.18215
PG	0.0213181	0.012437	0.00757266	0.00295491	0.00658686	0.0016817	0.00552725	0.00288998	0.00701375	0.00439242	0.00768472	0.00406804	0.0233082	0.00859008	0.00895132	0.00512444	0.00273381	0.00186909	0.00421938	0.00213128	0.00832233	0.00369728	0.0131484	0.00281427	0.0223684	0.0115503	0.00562244	0.00333078	0.0054439	0.00271702	0.00310646	0.00155833	0.00596312	0.00362965	0.00413122	0.00186973	0.136016	0.111821	0.0988577	0.133526	0.145459	0.0677689	0.0154293	0.0201967	0.050049	0.123418	0.0733273	0.068908	0.045812
LPA	0.0184466	0.0105207	0.020895	0.00549576	0.00504958	0.000557231	0.00408715	0.00128279	0.00568218	0.0045067	0.00523519	0.00437804	0.0166843	0.00658256	0.0287498	0.0049888	0.01918	0.00333455	0.0123181	0.00533176	0.00843482	0.00423672	0.00501844	0.00167134	0.0175688	0.012079	0.0195763	0.00348087	0.0107534	0.00426721	0.00837698	0.00373479	0.00763016	0.00415294	0.00531866	0.00209505	0.738936	0.0923942	0.0788023	0.125573	0.115048	0.0646515	0.589472	0.422445	0.142003	0.0409325	0.795784	0.408947	0.276419
PA	0.524231	0.0499082	0.551545	0.00775528	0.611232	0.0170032	0.64461	0.0700531	0.864303	0.106802	1.01337	0.0939603	0.670604	0.0775235	0.524276	0.0429318	0.545294	0.0213835	0.529967	0.0531529	0.580608	0.074035	0.58084	0.0771038	0.684902	0.136034	0.672482	0.0413069	0.706492	0.0855436	0.759877	0.100294	0.868122	0.0751279	0.792077	0.093694	0.40196	0.0460215	0.0724429	0.00750917	0.00134734	0.0459285	0.0541554	0.0605876	0.21959	0.228102	0.887056	0.827411	0.485125
CL	1.60503	0.0974165	1.46295	0.00783329	1.42273	0.0927477	1.59831	0.0992441	1.8589	0.0351805	1.7121	0.176254	1.57121	0.13225	1.60354	0.022205	1.64591	0.072635	1.56062	0.106574	1.68098	0.206004	1.58598	0.154495	1.41461	0.115305	1.47566	0.0563971	1.58258	0.175741	1.57538	0.0403668	1.80645	0.0704356	1.58299	0.0713665	0.0655051	0.0787386	0.93736	0.0132059	0.409214	0.697691	0.439522	0.919172	0.480735	0.906002	0.45632	0.238521	0.0848346
LCL	0.0889079	0.00952526	0.0520329	0.0279489	0.0145519	0.0102104	0.00719594	0.00352647	0.00852345	0.00283658	0.0065953	0.0023279	0.0521397	0.00480537	0.0663321	0.00626901	0.0277753	0.0115335	0.0124114	0.00671515	0.0110198	0.00373566	0.0108424	0.00289804	0.0551474	0.0153638	0.0339403	0.00794281	0.00881828	0.00598415	0.00467973	0.00254816	0.00627761	0.0016577	0.00347215	0.00201881	0.0965586	0.000767964	0.000153843	0.000150633	0.000130126	0.0357998	0.0278496	0.00113319	0.000305032	0.000218252	0.100913	0.00823862	0.00495091
Sph	0.547323	0.0399556	1.05496	0.0935219	0.74053	0.0363638	0.594247	0.0594734	0.314591	0.0237035	0.328539	0.0337257	0.664082	0.215238	1.05813	0.0542031	0.923221	0.0554369	0.685602	0.0531863	0.352728	0.0265686	0.3147	0.00288453	0.53479	0.0878822	1.08485	0.0708122	0.804556	0.084292	0.618531	0.0653514	0.392958	0.0620001	0.35058	0.0374118	0.000984456	0.00345372	0.320014	0.000970966	0.00192396	0.0371133	0.113574	0.874647	0.067728	0.0482546	0.0010786	0.0185057	0.255977
Cer	3.78661	0.185026	5.2014	0.17903	6.06018	0.349146	6.29695	0.396834	5.89634	0.345976	4.94266	0.501033	3.61581	0.273567	4.98213	0.381807	6.35951	0.0874413	6.93107	0.225899	8.19996	0.550034	7.93459	0.741309	3.37636	0.150111	5.18494	0.314589	6.31798	1.04515	6.1322	0.780222	5.4449	0.456447	4.71875	0.199844	0.000680274	0.000569488	0.000577395	0.000739618	0.0199653	0.00729007	7.81284e-05	8.52514e-05	0.000206673	0.000694578	0.000848571	0.00848935	0.00386448
IPC	0.492774	0.031584	0.566432	0.040328	0.640986	0.0780416	0.79357	0.0524399	0.850038	0.00959766	0.718768	0.0834851	0.510751	0.0346037	0.621478	0.0516344	0.728872	0.00561313	0.733455	0.0356877	0.854003	0.0795597	0.889828	0.115506	0.42033	0.0503648	0.604642	0.0307569	0.754142	0.109114	0.83965	0.0787992	0.926301	0.0935369	0.799405	0.0283129	0.0674405	0.038059	0.00104556	4.76803e-05	0.0118257	0.0367354	0.000420383	0.0014864	0.00237381	0.00552367	0.00565608	0.00857876	0.00148183
MIPC	5.56081	0.253486	5.31467	0.203962	5.0264	0.536959	5.90328	0.344548	6.13933	0.298521	5.55255	0.516549	5.20743	0.163134	5.42746	0.54554	5.42215	0.188385	5.04152	0.299335	4.92879	0.400127	4.59249	0.482597	4.5097	0.970735	5.48414	0.498008	5.94175	1.15797	6.07305	0.643423	6.2768	0.807146	5.62366	0.353219	0.260256	0.19404	0.237793	0.0627283	0.981352	0.53994	0.209867	0.446733	0.326607	0.104735	0.196781	0.176036	0.080688
DG	4.56804	0.401102	3.74245	0.139919	3.73939	0.315129	3.8848	0.12777	4.79412	0.722606	4.56599	0.404947	4.57324	0.233022	5.13834	0.202576	6.32495	0.239593	6.99973	0.210649	7.20698	0.896032	6.99665	0.852847	4.70008	0.973694	4.31776	0.370127	3.87748	0.591213	3.95048	0.393829	3.97365	0.57164	3.58393	0.0361348	0.0281431	0.048132	0.0482579	0.660347	0.995329	0.0338588	0.000816304	0.000180458	0.00788866	0.00898622	0.559523	0.279188	0.284035
TG	12.5932	0.834392	17.0276	0.862088	19.5018	3.99154	26.6896	2.23716	37.0934	5.53576	38.5766	5.17756	11.9432	0.640874	16.9331	0.743672	25.6948	2.92174	32.2304	3.81873	54.1343	2.96177	66.6642	3.75721	9.85171	1.02962	14.3099	0.324966	19.9867	0.952684	24.1019	0.736652	31.5499	3.29765	30.9024	0.816797	0.00305776	0.0426263	0.000515472	0.00162433	0.0010129	0.000918428	0.00134757	0.000817445	1.75395e-05	1.55238e-05	0.00202237	0.000234576	4.08123e-05
EE	18.5156	4.2177	24.9616	2.72035	27.4268	2.79394	26.7304	0.749896	27.3212	4.34939	28.2755	3.00835	19.3523	2.45093	23.5359	2.59721	24.5558	5.09918	27.5956	5.23365	30.3405	2.08727	29.7672	0.76117	19.4637	5.05085	21.9438	3.33786	25.1737	1.53604	23.4979	4.51517	26.3208	4.06502	26.0948	3.64744	0.0901535	0.0379968	0.0293394	0.0655386	0.0309919	0.112319	0.186374	0.0689026	0.00409849	0.00215846	0.51716	0.134307	0.360638
PE/(PC+PI)	0.173383	0.000966302	0.146144	0.00373055	0.142621	0.00697338	0.127815	0.00153893	0.12924	0.00393866	0.129736	0.0165066	0.171135	0.00372256	0.148431	0.00124173	0.137226	0.0037151	0.127635	0.00391449	0.112874	0.0093264	0.0997986	0.0125734	0.17512	0.00951703	0.149114	0.00601517	0.136401	0.0019925	0.132457	0.00335012	0.130748	0.00384013	0.122413	0.00651729	0.000255615	0.00163389	1.68003e-06	4.66144e-05	0.0102445	0.000557461	0.000365979	0.000153253	0.000551463	0.000707168	0.0161191	0.00231694	0.00184946
Curvature ind.	5.40025	0.30576	3.53247	0.415877	2.50336	0.142251	1.89715	0.0741206	1.65794	0.195492	1.72241	0.087824	4.99526	0.179816	3.93068	0.288868	2.83522	0.284085	2.30872	0.257225	1.32561	0.105784	0.989138	0.0103874	6.39108	1.5759	3.81647	0.435602	2.60186	0.497636	2.22659	0.237358	2.07723	0.252527	2.34287	0.19583	0.00330729	0.000118828	4.26066e-05	5.77484e-05	3.67056e-05	0.00562032	0.000371091	0.000120485	6.91431e-06	2.71186e-06	0.0525819	0.0165198	0.010609
Average species profile
[26:1]	0.130804	0.0196499	0.108444	0.00957858	0.110377	0.0294362	0.0873262	0.00783589	0.089109	0.00469735	0.0898413	0.00854133	0.136935	0.0106681	0.10788	0.00629866	0.0979578	0.0204915	0.0920705	0.010345	0.0759723	0.00469872	0.0822082	0.013842	0.146105	0.00600049	0.154884	0.0196611	0.129921	0.0204661	0.111868	0.0266165	0.10512	0.0320634	0.0902658	0.0230372	0.151143	0.374034	0.0235905	0.0232812	0.0296158	0.0153227	0.0431471	0.00638721	0.00082323	0.00560221	0.500559	0.25903	0.0954434
[26:0]	0.837919	0.0154654	0.670542	0.0173796	0.520221	0.0160893	0.420929	0.0156194	0.235195	0.0147438	0.214716	0.0207578	0.90447	0.0374583	0.654388	0.0606365	0.510839	0.0535824	0.379373	0.0485687	0.170249	0.0242256	0.136287	0.00871019	0.963906	0.0538665	0.762516	0.0329447	0.617491	0.0609258	0.479871	0.0650904	0.294831	0.041315	0.309792	0.0428946	0.000238489	1.60559e-05	5.11542e-06	1.05007e-06	1.9768e-06	0.00370428	0.000477635	0.000120432	9.01058e-06	4.16452e-06	0.00524398	0.00179884	0.000579097
[28:1]	1.4389	0.0530612	1.18307	0.0455617	0.888565	0.0577213	0.719481	0.0605978	0.418152	0.015103	0.342505	0.0290071	1.61742	0.097258	1.14716	0.124747	0.850338	0.126278	0.610159	0.0935814	0.267956	0.0528423	0.188821	0.0187059	2.03031	0.0595797	1.6314	0.0677195	1.32953	0.124778	1.03435	0.106058	0.623256	0.0294151	0.560309	0.0580091	0.00317755	0.000262683	0.000101896	5.65196e-06	6.12833e-06	0.00674747	0.00113194	0.000206605	2.97284e-05	1.52368e-05	0.00156089	0.000928669	0.000143577
[28:0]	1.55455	0.0255122	1.47122	0.0272724	1.34002	0.00503572	1.23734	0.0362655	1.01234	0.0182489	0.942447	0.0468146	1.81876	0.0341003	1.61868	0.0885467	1.5371	0.0755552	1.44717	0.0841825	1.09955	0.0643796	0.94764	0.0209373	1.83058	0.0872734	1.70404	0.0916595	1.57856	0.0469105	1.46253	0.0610542	1.2449	0.0579121	1.30388	0.102766	0.0180673	0.000139342	0.000243829	7.41137e-06	3.77317e-05	0.0217282	0.00416712	0.00209399	6.86199e-05	2.95436e-06	0.15834	0.0116406	0.00391783
[30:1]	1.48846	0.0271683	1.22669	0.0229384	0.953217	0.0671201	0.805039	0.0522495	0.55097	0.0158612	0.495049	0.0392893	1.69125	0.0600054	1.2038	0.109882	0.911008	0.114969	0.7067	0.0874307	0.381385	0.0600699	0.305964	0.0235358	1.9691	0.0693693	1.56374	0.131807	1.29571	0.0873212	1.0718	0.0890267	0.770663	0.0367151	0.721257	0.0699773	0.000217943	0.000214515	3.61597e-05	8.43272e-07	3.5458e-06	0.00252051	0.000479034	8.74486e-05	1.16605e-05	3.10973e-06	0.00921373	0.000472345	0.00016115
[30:0]	0.426204	0.0082468	0.440855	0.011637	0.433936	0.00650067	0.418112	0.00673871	0.39512	0.0110758	0.376292	0.0166526	0.518522	0.00799377	0.513755	0.010542	0.536322	0.0110744	0.552307	0.00520034	0.518657	0.00589159	0.497408	0.00576963	0.485877	0.035487	0.49742	0.0228189	0.488607	0.0101301	0.488992	0.0122984	0.461416	0.0143905	0.46808	0.0241563	0.149833	0.271219	0.258481	0.0175578	0.00964578	0.566438	0.0869378	0.00357531	0.982403	0.0206615	0.660295	0.904212	0.892699
[32:1]	0.880927	0.0246269	0.83045	0.0147036	0.741004	0.0364418	0.679106	0.014368	0.590137	0.0407819	0.574404	0.04498	0.803414	0.0297619	0.692508	0.0323602	0.592081	0.0260585	0.519671	0.040865	0.362192	0.0116556	0.307087	0.00329069	0.957936	0.0182029	0.852912	0.0280609	0.758823	0.012786	0.703342	0.0134972	0.624766	0.0293228	0.646004	0.0302928	0.038097	0.00529264	0.00025417	0.000452933	0.000491272	0.0119755	0.000758379	0.000626903	1.81474e-05	8.7605e-06	0.00554835	0.000101033	4.11169e-05
[32:0]	0.0381279	0.0056528	0.0503899	0.00592427	0.0585186	0.0100197	0.0699221	0.00198414	0.0777533	0.00628258	0.0841605	0.0131131	0.0450074	0.00302665	0.0494615	0.00368427	0.0565059	0.00533859	0.0614578	0.00342975	0.0686969	0.00928059	0.0735176	0.00916162	0.03245	0.00644305	0.0420284	0.00518886	0.0537797	0.00406719	0.0619128	0.00200371	0.0663273	0.00128962	0.0683895	0.00474656	0.0604471	0.0372938	0.000777989	0.00125037	0.00504562	0.180978	0.0315154	0.00338312	0.0136592	0.006896	0.115399	0.00834723	0.00163822
[34:2]	1.7784	0.124656	1.32283	0.0759697	1.10329	0.0858341	0.917006	0.0571702	0.76814	0.0312793	0.822677	0.020628	1.57909	0.112659	1.05369	0.0608529	0.810586	0.0506494	0.680599	0.05976	0.437388	0.0318623	0.378923	0.0361513	1.74653	0.0589199	1.29221	0.0642933	1.05479	0.0171097	0.930685	0.0346702	0.814802	0.00902995	0.913525	0.0345387	0.00567214	0.00151124	0.000405223	0.000168503	0.000195983	0.00207076	0.000420491	0.000258868	7.20312e-05	6.16333e-05	0.000835524	4.05469e-05	3.23624e-05
[34:1]	33.6237	0.873025	36.8689	0.801524	38.3739	1.77776	39.4407	0.219279	41.9935	0.929106	41.5157	0.989469	29.5915	0.415332	31.8795	0.619375	32.211	0.717471	32.1394	0.51713	32.0737	1.08239	30.6318	0.510457	29.3822	1.01982	33.3129	0.496464	34.2265	1.19268	35.4552	0.895972	36.9022	0.730281	37.378	0.261417	0.00901871	0.0142114	0.000362734	0.000341112	0.000490176	0.006029	0.00542386	0.0026495	0.0206809	0.0520025	0.00387672	0.00589776	0.00149447
[34:0]	0.000715324	0.000622323	0.00558183	0.00117234	0.012503	0.00413732	0.0227089	0.00322602	0.0196673	0.000601484	0.0135954	0.00444572	0.00372438	0.000560459	0.00998572	0.00381171	0.0234977	0.00448771	0.0346282	0.00302463	0.0623349	0.00782197	0.0688333	0.00798873	0.00076422	0.000662184	0.00468567	0.00184692	0.013252	0.0023398	0.0199105	0.00465023	0.0201647	0.00481057	0.0111562	0.000882187	0.00314996	0.00816114	0.000316151	2.88617e-06	0.00765351	0.0480763	0.00163026	6.40275e-05	0.000205417	0.000147591	0.025776	0.000882816	0.00212297
[36:2]	52.9413	0.416613	49.0362	0.46919	46.9637	1.04114	45.6182	0.442686	42.3482	0.544621	42.6201	0.972551	54.8955	0.22446	50.9766	0.558251	47.5329	0.487627	45.3207	0.730075	39.4015	0.940052	37.6077	0.112589	56.018	1.36092	51.7081	0.378089	50.1176	1.05363	48.913	0.741295	46.8772	0.700028	47.1402	0.179817	0.000419942	0.000764924	3.11764e-05	1.15958e-05	7.19289e-05	0.000351816	1.86182e-05	2.66192e-05	1.00063e-05	2.96641e-08	0.00614924	0.0040334	0.00136173
[36:1]	4.04532	0.325892	5.76658	0.436226	7.30667	0.427153	8.09207	0.423189	9.6836	0.223832	10.1279	0.241795	5.55414	0.120601	8.95352	0.120771	12.7436	0.293355	15.555	0.611474	22.1598	0.395093	25.2836	0.385199	3.73571	0.206681	5.56369	0.164606	7.12211	0.142049	7.87476	0.25233	9.41662	0.193441	8.6648	0.275126	0.00541589	0.000462767	0.000194734	1.5942e-05	1.30773e-05	4.21277e-06	2.51451e-06	9.96959e-06	2.54952e-07	1.16683e-07	0.000277966	1.98114e-05	2.53582e-05
[38:2]	0.163297	0.0171395	0.218526	0.0121724	0.243204	0.0376253	0.266325	0.00338992	0.272332	0.0157537	0.269991	0.0301504	0.174813	0.00990189	0.203079	0.00838685	0.237733	0.0183331	0.254736	0.0103306	0.249967	0.0270914	0.263945	0.0257064	0.154825	0.00682895	0.205407	0.0106812	0.237561	0.0157721	0.260212	0.0122251	0.263175	0.00592958	0.273485	0.0205196	0.0104136	0.0286343	0.000517778	0.00125541	0.00597137	0.0195554	0.00638212	0.000638884	0.0107165	0.00497871	0.00230017	0.00113083	0.0001999
[38:1]	0.000626153	0.000747478	0.00427441	0.00185142	0.0111474	0.00315988	0.0130774	0.00258822	0.0213879	0.000571461	0.0262591	0.00594965	0.00142047	0.000682306	0.00773898	0.00199898	0.0190489	0.00113164	0.0282371	0.00347138	0.0591853	0.00479176	0.0714149	0.00230385	0	0	0.00322545	0.000488284	0.00994063	0.00454568	0.0107707	0.00231807	0.0233651	0.00371812	0.0221022	0.00615667	0.0340259	0.00495298	0.00132056	2.79928e-06	0.00177512	0.0066005	2.07882e-05	0.000194362	3.23538e-05	9.23338e-07	0.000332992	0.0193071	0.00129424
[40:2]	0.0245287	0.0102251	0.0395957	0.00510972	0.0397145	0.0103073	0.04771	0.00429014	0.046718	0.0068068	0.0377919	0.00991866	0.0374758	0.00272524	0.0467615	0.00241411	0.0576476	0.0023831	0.0635702	0.00178709	0.0631437	0.00852779	0.0648943	0.00559809	0.0250276	0.00957415	0.035267	0.00846397	0.0431542	0.00468121	0.0499797	0.00184041	0.0484032	0.00269241	0.0432481	0.00438713	0.0845033	0.144273	0.0223386	0.0352253	0.18212	0.0115322	0.000644786	0.000156717	0.00767381	0.00158646	0.237492	0.0421377	0.0113964
[40:1]	0.000508783	0.000606418	0.00368592	0.00129724	0.00489216	0.00145105	0.0087409	0.00263584	0.0137852	0.00389303	0.0149452	0.00347158	0.000863334	0.000153224	0.00435308	0.00120947	0.0157675	0.00415339	0.0294788	0.00411286	0.0719743	0.00695598	0.0938248	0.0051596	0.000275224	0.000476702	0.00170947	0.000967153	0.00420621	0.00448321	0.00708525	0.00277781	0.0125845	0.003853	0.0125594	0.00269947	0.018414	0.00847601	0.00620484	0.00429543	0.00208379	0.00771742	0.00341909	0.000272634	5.98182e-05	6.29443e-06	0.0825844	0.20551	0.0138612
[42:1]	0.0391418	0.0142113	0.0763259	0.00514256	0.12538	0.0296074	0.168699	0.0168584	0.241514	0.0250833	0.265666	0.0123501	0.049657	0.0088273	0.121863	0.00978197	0.233651	0.0386181	0.336465	0.0333773	0.684844	0.0644227	0.896729	0.0564734	0.043284	0.0172671	0.0731004	0.00685176	0.130851	0.0128124	0.162638	0.00722917	0.225374	0.00299002	0.21625	0.00636172	0.0130378	0.010432	0.000525024	0.000262609	3.13333e-05	0.00068751	0.0012961	0.000135586	7.15433e-05	1.36832e-05	0.0498189	0.00212993	0.000382253
[44:1]	0.018751	0.0118326	0.0216553	0.00910618	0.0233978	0.0116545	0.040039	0.00843445	0.0553068	0.00961589	0.0537556	0.00844695	0.0276436	0.00687615	0.0371933	0.00830717	0.0582057	0.0103909	0.0765439	0.0109853	0.135857	0.0104615	0.156757	0.013633	0.0118306	0.0081649	0.0153638	0.00703777	0.0272684	0.00560943	0.0365059	0.00619988	0.0578584	0.0013901	0.0520417	0.00399983	0.753122	0.653295	0.0641532	0.0142294	0.0140272	0.199853	0.013175	0.00283236	0.000115946	0.000126439	0.60057	0.0541368	0.0140446
[46:1]	0.131108	0.0219278	0.148369	0.0156399	0.169622	0.032369	0.209026	0.0232164	0.269784	0.0266001	0.26533	0.0132487	0.144538	0.00508254	0.179924	0.0057816	0.241926	0.0256283	0.289075	0.0269704	0.463612	0.0443462	0.549419	0.0348586	0.0980064	0.0211942	0.123436	0.00810522	0.160096	0.0103668	0.183903	0.00572414	0.252143	0.0101338	0.233061	0.008283	0.32924	0.163168	0.0134124	0.00223063	0.000817577	0.00134812	0.00296352	0.000801363	0.000244594	3.75698e-05	0.12422	0.0103538	0.00247445
[48:1]	0.362586	0.0388405	0.427349	0.0459492	0.498003	0.0701041	0.622738	0.0604489	0.783709	0.0993929	0.758816	0.0150907	0.345208	0.0174994	0.465801	0.0224584	0.63231	0.0627507	0.728556	0.0607063	1.06308	0.103006	1.24163	0.0754178	0.297769	0.036006	0.383198	0.022236	0.506614	0.0513309	0.584601	0.0447384	0.765629	0.0585221	0.750824	0.0526317	0.13571	0.042961	0.00329985	0.00239647	7.9575e-05	0.00183773	0.00158186	0.000463485	0.000285562	3.64877e-05	0.0249749	0.00448067	0.000982108
[50:1]	0.0741605	0.0107019	0.0784878	0.0139988	0.0787003	0.0187054	0.0957041	0.0176159	0.113606	0.0187939	0.088096	0.0213722	0.0586941	0.0109187	0.0723526	0.00923101	0.0900111	0.0175065	0.0940427	0.0246166	0.128873	0.0137618	0.151629	0.018531	0.0695293	0.020804	0.068715	0.0143931	0.0936046	0.00670688	0.0960251	0.00502724	0.129214	0.00657043	0.120777	0.0108907	0.692467	0.733678	0.144489	0.0342147	0.369699	0.173348	0.0582471	0.0853913	0.00228931	0.00170466	0.958211	0.129084	0.0986204
Sum	100	3.62307e-14	100	1.74047e-14	100	1.42109e-14	100	2.46139e-14	100	0	100	4.14314e-14	100	2.24693e-14	100	0	100	2.24693e-14	100	1.74047e-14	100	1.74047e-14	100	1.42109e-14	100	1.74047e-14	100	1.42109e-14	100	1.00486e-14	100	2.46139e-14	100	3.01458e-14	100	3.17764e-14	1	1	1	0.534186	0.250815	0.334852	0.481817	1	1	1	1	1	1
C ≤ 32	6.79589	0.0741291	5.98166	0.0979538	5.04586	0.136141	4.43726	0.163136	3.36878	0.0270439	3.11941	0.146943	7.53577	0.234646	5.98763	0.411136	5.09215	0.413684	4.36891	0.345218	2.94466	0.215958	2.53893	0.0828081	8.41627	0.211706	7.20893	0.347109	6.25243	0.30838	5.41468	0.289472	4.19128	0.157496	4.16797	0.30192	0.000328582	4.03349e-05	2.19261e-05	1.87142e-07	2.66554e-06	0.00478929	0.000881119	0.000193676	1.53536e-05	4.07705e-06	0.00677546	0.000557762	0.000131649
C ≥ 40	0.650785	0.101233	0.795468	0.0947427	0.939709	0.170618	1.19266	0.127102	1.52442	0.178241	1.4844	0.0739316	0.66408	0.041661	0.928249	0.0541771	1.32952	0.15914	1.61773	0.158391	2.61139	0.244967	3.15488	0.186296	0.545722	0.0774873	0.70079	0.0448422	0.965794	0.0616286	1.12074	0.0550025	1.49121	0.0727074	1.42876	0.0577146	0.144986	0.065186	0.00446144	0.00179519	0.000324418	0.00258929	0.00218463	0.000543791	0.000170535	2.2704e-05	0.03994	0.00182591	0.0004684
db = 0	2.9183	0.0529028	2.66958	0.0573874	2.38723	0.0270624	2.1835	0.0528419	1.74982	0.0346536	1.64345	0.0983525	3.36975	0.0717827	2.88029	0.16817	2.68771	0.149453	2.49354	0.141769	1.9298	0.107831	1.73195	0.0361711	3.41975	0.102998	3.053	0.134057	2.78164	0.109302	2.53597	0.125065	2.1087	0.100153	2.18639	0.168467	0.00526037	0.000101655	6.9867e-05	5.68365e-06	3.85982e-05	0.00975989	0.00205117	0.000671347	4.28893e-05	3.8473e-06	0.019817	0.00181624	0.000699899
db = 1	43.1317	0.438057	47.2934	0.409216	49.7434	1.11308	51.3227	0.552538	55.1316	0.559883	55.03	1.11906	40.9859	0.307269	45.4082	0.550403	49.1245	0.568754	51.5888	0.815367	58.2395	0.993665	60.2482	0.0413093	39.9844	0.87764	44.3646	0.314331	46.2916	1.0795	47.7611	0.763721	50.4119	0.60741	50.0458	0.42853	0.000274223	0.0006651	3.60164e-05	8.14763e-06	6.78322e-05	0.000263211	2.61682e-05	2.9956e-05	8.73329e-06	4.47152e-08	0.00124028	0.0014211	0.000317949
db = 2	53.95	0.399982	50.037	0.450303	47.8693	1.10427	46.4938	0.521014	43.1186	0.53134	43.3265	1.03391	55.6443	0.378681	51.7115	0.605176	48.1878	0.451232	45.9177	0.699717	39.8307	0.908125	38.0198	0.0195201	56.5959	0.97825	52.5824	0.247921	50.9268	1.01009	49.7029	0.693745	47.4794	0.617707	47.7678	0.261068	0.000355297	0.000855675	3.94674e-05	9.3971e-06	7.71764e-05	0.000673662	2.56114e-05	2.94063e-05	9.90584e-06	1.4269e-07	0.00232816	0.00221218	0.000571874
Double bond index	1.51032	0.00365614	1.47367	0.00494646	1.45482	0.0109605	1.4431	0.0049315	1.41369	0.00503565	1.41683	0.00951316	1.52275	0.00450212	1.48831	0.00697205	1.455	0.00358347	1.43424	0.00595468	1.37901	0.00827809	1.36288	0.000408938	1.53176	0.0107931	1.49529	0.00245087	1.48145	0.00948225	1.47167	0.00640764	1.45371	0.00643614	1.45581	0.000971475	0.000497781	0.00114055	4.5547e-05	1.13626e-05	9.17267e-05	0.00198627	3.41496e-05	3.32164e-05	1.2198e-05	4.25505e-07	0.00466125	0.00373135	0.0011548
C = 26	0.989284	0.0149795	0.788131	0.0139611	0.636485	0.0387619	0.511645	0.0223403	0.326122	0.0104838	0.30684	0.0196912	1.06657	0.0503729	0.7714	0.0660597	0.614169	0.0737698	0.474998	0.0589615	0.247543	0.0235691	0.219544	0.0221877	1.14596	0.0654532	0.930341	0.0145087	0.755582	0.0569799	0.597122	0.0425664	0.404005	0.0159763	0.40474	0.035195	6.99691e-05	0.000124465	6.65741e-06	3.84556e-07	1.14831e-06	0.00353708	0.00093116	0.000189572	1.40286e-05	1.17776e-05	0.00508809	0.00146353	0.000261179
C = 28	3.05708	0.0390715	2.68545	0.0431729	2.24937	0.05618	1.96988	0.0950203	1.4385	0.0270545	1.29459	0.0752059	3.51916	0.134076	2.79894	0.214423	2.40847	0.20443	2.07282	0.180487	1.37487	0.117668	1.14192	0.0396907	3.98524	0.0607724	3.38231	0.153125	2.93981	0.172921	2.51952	0.157529	1.887	0.0842661	1.88582	0.160082	0.000380787	3.38063e-05	5.21261e-05	4.94536e-07	3.54595e-06	0.00785711	0.00140963	0.000369265	3.14469e-05	7.91866e-06	0.00317133	0.00058908	0.000114015
C = 30	1.95534	0.0179509	1.68712	0.0314473	1.4001	0.0620282	1.23131	0.055308	0.951389	0.0162278	0.877878	0.055645	2.26308	0.0631566	1.73812	0.121867	1.46008	0.124583	1.26848	0.0906821	0.904889	0.0664873	0.807231	0.0253346	2.53368	0.0689367	2.09007	0.150131	1.80373	0.0883332	1.57494	0.0874733	1.24451	0.0447604	1.20313	0.0936951	0.000212763	0.000118377	2.73425e-05	2.24736e-07	5.74338e-06	0.00269355	0.000571345	9.88713e-05	1.37152e-05	3.16676e-06	0.00965417	0.000351531	0.000117844
C = 32	0.938565	0.0178855	0.89119	0.00834212	0.806965	0.0270958	0.754039	0.0143834	0.671634	0.0365234	0.663551	0.0357273	0.868908	0.0328704	0.750844	0.0369664	0.654298	0.0302587	0.5855	0.0431127	0.433208	0.0132108	0.382424	0.0114423	1.02221	0.0167075	0.907522	0.0319921	0.821428	0.0162856	0.772178	0.0139916	0.698055	0.0304468	0.722722	0.0313511	0.0141702	0.00216802	0.00015422	0.000341376	0.000283554	0.0144476	0.00114008	0.000824495	2.87133e-05	1.72694e-05	0.00531521	0.000118002	3.78329e-05
C = 34	36.1539	0.733126	38.6457	0.78631	39.8568	1.74073	40.6503	0.188824	43.0209	0.96321	42.6712	0.984264	31.9237	0.32409	33.3354	0.552278	33.3352	0.745119	33.1006	0.517209	32.7483	1.08282	31.2285	0.47977	32.127	0.735116	35.0971	0.461572	35.6768	1.1456	36.7349	0.862003	38.1173	0.673086	38.7497	0.289465	0.015935	0.0273875	0.000503571	0.000601531	0.000776142	0.0188022	0.0396023	0.0288435	0.275013	0.106063	0.0040611	0.0106824	0.00214016
C = 36	56.0737	0.644562	54.2721	0.777776	53.845	1.41241	53.4009	0.25988	51.7632	0.766842	52.3918	0.762877	59.4979	0.352133	59.4526	0.422602	59.9275	0.171845	60.5826	0.221949	61.355	0.612094	62.7133	0.295779	58.4628	0.805836	56.6704	0.391173	56.7762	0.969061	56.3971	0.741271	55.8535	0.787772	55.2895	0.104131	0.0366082	0.0677498	0.0026385	0.00173158	0.00308714	0.893337	0.130377	0.0107113	0.0103789	0.00026671	0.0256819	0.081333	0.0308549
C = 38	0.167435	0.0183669	0.225428	0.0142763	0.256734	0.0407563	0.28127	0.00221914	0.295365	0.0154221	0.298464	0.0270857	0.180467	0.00997264	0.213338	0.00828199	0.259042	0.0185543	0.285098	0.0100166	0.310808	0.023691	0.336965	0.024531	0.159846	0.00787945	0.211568	0.0103918	0.250209	0.0195256	0.273447	0.0143216	0.289437	0.00734268	0.299025	0.0186503	0.0124678	0.0258206	0.000439009	0.000762889	0.00227026	0.0117637	0.00295546	0.000213296	0.000926795	0.000513395	0.0023523	0.00174884	0.000273093
C = 40	0.0255868	0.0106326	0.0437945	0.00650847	0.0450258	0.0118905	0.0568305	0.00698138	0.0608438	0.0107137	0.0531342	0.0128493	0.0392591	0.00282214	0.0517267	0.00371941	0.0740624	0.00648971	0.0937486	0.00586257	0.135842	0.0150591	0.159479	0.0107858	0.0260628	0.00984994	0.0374925	0.00954287	0.0478704	0.00916308	0.0575808	0.00444118	0.0616005	0.00573034	0.0564529	0.00698005	0.0646847	0.102401	0.0131115	0.0155307	0.0458898	0.00984257	0.00104204	0.000131342	0.000399564	4.83804e-05	0.222366	0.0484306	0.00721884
C = 42	0.0399963	0.0146242	0.077227	0.00529218	0.126558	0.0299611	0.169832	0.0170479	0.242867	0.0252267	0.267665	0.0123403	0.0508748	0.00925101	0.12332	0.00996311	0.235709	0.0390039	0.338988	0.033641	0.688529	0.0648659	0.901031	0.0568404	0.0447909	0.0181734	0.07414	0.00709115	0.132283	0.013123	0.164114	0.00737025	0.227651	0.00328078	0.218766	0.00604786	0.0143024	0.0108471	0.000559375	0.000271925	3.27512e-05	0.000766021	0.0013325	0.000138812	7.26111e-05	1.38943e-05	0.0596816	0.0024972	0.000458558
C = 44	0.0191693	0.0121362	0.0219151	0.00923064	0.0236197	0.0117778	0.0403093	0.00850687	0.0556165	0.00966838	0.0541638	0.00853884	0.028327	0.00716637	0.0376438	0.00845878	0.0587198	0.0105055	0.0771189	0.0110804	0.136587	0.0105272	0.157512	0.013768	0.0121903	0.00839949	0.0155815	0.00715138	0.0275621	0.0056563	0.0368336	0.00623317	0.0584419	0.00137276	0.0526447	0.00396495	0.770687	0.672184	0.0689057	0.0152426	0.0150413	0.219212	0.0143825	0.00305341	0.000123818	0.000134579	0.622614	0.0582332	0.0150886
C = 46	0.133924	0.0226256	0.150122	0.0159497	0.17121	0.0327438	0.210429	0.0234427	0.271293	0.02673	0.267327	0.013296	0.148027	0.00563931	0.182072	0.0059827	0.244056	0.0259144	0.291247	0.0272577	0.466108	0.0446709	0.552062	0.0352662	0.101117	0.0215672	0.125178	0.0082709	0.161825	0.0102381	0.185566	0.00563059	0.254678	0.00981359	0.235771	0.00796811	0.368139	0.179984	0.0152577	0.00245109	0.000917996	0.00200082	0.00329907	0.000876297	0.000256148	4.00032e-05	0.14553	0.0116516	0.0027898
C = 48	0.370345	0.0403566	0.432392	0.0467431	0.502656	0.0709231	0.626913	0.0610368	0.788088	0.0998401	0.764534	0.0151756	0.353546	0.0187909	0.471359	0.0228629	0.637882	0.0635529	0.734029	0.0614041	1.06881	0.103789	1.24761	0.0765536	0.307243	0.0356893	0.388573	0.0218726	0.51207	0.0511506	0.589854	0.0443107	0.773296	0.0578371	0.759538	0.0521846	0.156789	0.0483945	0.00371356	0.00255494	9.29323e-05	0.00231948	0.00175078	0.000508287	0.000300578	3.95963e-05	0.0281656	0.00471746	0.0010031
C = 50	0.0757528	0.0110905	0.0794174	0.0142181	0.0794362	0.0188962	0.0963487	0.0177688	0.114242	0.0188967	0.0887733	0.021603	0.0601321	0.0113888	0.0732219	0.00942131	0.0908068	0.0177	0.0947552	0.024847	0.129571	0.0139022	0.152364	0.0187233	0.0719208	0.0221974	0.0697036	0.0147399	0.0946153	0.00665315	0.0968914	0.00497341	0.130513	0.00645831	0.122197	0.0111962	0.742602	0.785391	0.163758	0.0383049	0.405613	0.199832	0.0650578	0.0932711	0.00259309	0.00188253	0.892371	0.165073	0.130044
Average chain length	34.8553	0.0278464	34.8872	0.031619	34.948	0.0404435	35.0053	0.0236669	35.073	0.0349357	35.0925	0.0187266	34.8789	0.0146393	34.9997	0.020184	35.1061	0.00233797	35.1916	0.00775891	35.3956	0.0295552	35.5044	0.0192499	34.7961	0.0175278	34.8531	0.0171783	34.9426	0.0158303	35.0021	0.0122156	35.1068	0.0155239	35.09	0.0160779	0.259726	0.0308426	0.00207033	0.00107961	0.000255622	0.00110548	1.19851e-05	5.22644e-06	1.09748e-05	1.485e-06	0.0158503	0.000425588	7.52817e-05
Membrane lipids include all measured lipids except Sph, DG, TG, and EE.
Data are expressed as mean ± SD, n= 3 (independent experiments).
Student’s t-tests were performed for pairwise multiple comparisons; significance was accepted for p < 0.05 corresponding to a false discovery rate q < 0.034. Green fill indicates p < 0.05.
PC, phosphatidylcholine; PE, phosphatidylethanolamine; MMPE, monomethyl-PE; DMPE, dimethyl-PE; PI, phosphatidylinositol; PS, phosphatidylserine; PG, phosphatidylglycerol; PA, phosphatidic acid; CL, cardiolipin; LPC, LPE, LPI, LPS, LPA, LCL, the corresponding lyso lipids;
Sph, sphingoid base; Cer, ceramide; IPC, inositolphosphoceramide; MIPC, mannosyl-inositolphosphoceramide; DG, diacylglycerol; TG, triacylglycerol; EE, ergosteryl ester.
Sum formulas for glycero(phospho)lipids are defined as the lipid class abbreviation followed by the total number of carbons and total number of double bonds for all chains, e.g. PC(34:1).
Sum formulas for sphingolipids are defined as the lipid class abbreviation followed by the total number of carbons, total number of double bonds and total number of hydroxyl groups in the long chain base and the fatty acyl moiety, e.g. Cer(44:0:3).
Curvature inducers include all lyso lipids as well as MMPE and DMPE.
Double bond index and average acyl chain length were calculated for GPLs as Σ(db x [GPLi])/Σ[GPLi] and Σ(C x [GPLi])/Σ[GPLi], respectively, where db is the total number of double bonds and C is the total number of carbons in fatty acyls in a given GPL species, and the square bracket indicates mol% of GPLs.
[truncated: 14 more columns]

## Sheet: S4_nmol
Table S4. Lipidomic dataset for absolute concentration data (lipid/prot (nmol/mg))
	lipid/prot (nmol/mg)																																				p value
Lipid species	WT at 40 °C												tps1Δ at 40 °C												ntp1Δ at 40 °C												WT					tps1Δ					ntpΔ
	0 min		20 min		40 min		60 min		120 min		180 min		0 min		20 min		40 min		60 min		120 min		180 min		0 min		20 min		40 min		60 min		120 min		180 min		0 vs 20 min	0 vs 40 min	0 vs 60 min	0 vs 120 min	0 vs 180 min	0 vs 20 min	0 vs 40 min	0 vs 60 min	0 vs 120 min	0 vs 180 min	0 vs 20 min	0 vs 40 min	0 vs 60 min
	mean	SD	mean	SD	mean	SD	mean	SD	mean	SD	mean	SD	mean	SD	mean	SD	mean	SD	mean	SD	mean	SD	mean	SD	mean	SD	mean	SD	mean	SD	mean	SD	mean	SD	mean	SD
LPC [16:1]	0.0772058	0.0241509	0.031507	0.00813705	0.00927633	0.00419823	0.00390715	0.00243199	0.00259472	0.00346405	0.000614528	0.00106439	0.0482704	0.00524968	0.0261106	0.00778504	0.00913277	0.00424455	0.00350648	0.00142344	0	0	0	0	0.0667632	0.0175964	0.0315657	0.0107381	0.0107495	0.00624595	0.00711454	0.00335416	0.0043209	0.00229725	0.00415111	0.00368283	0.0360154	0.00864952	0.00638204	0.00610057	0.00537154	0.0150037	0.000553107	0.000140681	9.08634e-05	9.08634e-05	0.0416622	0.00653441	0.00448555
LPC [16:0]	0.0317892	0.0120309	0.0355072	0.00432316	0.0209027	0.00463238	0.0220554	0.00380416	0.0165648	0.00446342	0.0137686	0.00424242	0.0295555	0.0162214	0.0302637	0.0295963	0.0320768	0.007761	0.0257015	0.00544292	0.00981156	0.0031931	0.00565821	0.00435374	0.0240676	0.00321442	0.0359546	0.00260203	0.0470227	0.0104279	0.0328237	0.00247473	0.0308133	0.00345256	0.0322548	0.00581972	0.640923	0.217396	0.252453	0.109077	0.0706967	0.972748	0.820063	0.716323	0.107415	0.0693605	0.00760561	0.0218949	0.0201471
LPC [18:1]	3.14155	0.999067	1.94083	0.288044	1.15073	0.231099	0.92153	0.131676	0.668494	0.249008	0.48772	0.119546	2.17946	0.139942	2.04222	0.365334	1.51612	0.204019	1.13622	0.232808	0.563119	0.0477591	0.352508	0.0425525	2.63219	0.386228	2.03513	0.264071	1.4347	0.374841	1.08255	0.180119	0.912977	0.0923324	0.770191	0.192122	0.116093	0.0282356	0.0188464	0.014143	0.0102742	0.576244	0.00970482	0.00265174	4.58389e-05	2.70052e-05	0.0915963	0.0182449	0.0032479
LPC [18:0]	0.0069881	0.00492307	0.0788198	0.0156532	0.0499028	0.0124156	0.0302281	0.00845791	0.0124716	0.00584855	0.00807856	0.00571736	0.00886426	0.00251461	0.0908966	0.025199	0.142319	0.0195897	0.150229	0.0215497	0.12621	0.00354525	0.0735443	0.0100596	0.00780967	0.00332823	0.0954889	0.0146332	0.0852007	0.0149622	0.0461841	0.00492096	0.0286498	0.00387888	0.0237847	0.00933874	0.00162268	0.00510566	0.0146941	0.281956	0.814661	0.00495802	0.000304808	0.000351287	1.25104e-06	0.000416285	0.000536696	0.00094219	0.000363356
LPC	3.25753	1.03981	2.08666	0.315548	1.23081	0.251191	0.977721	0.144269	0.700125	0.261601	0.510181	0.130106	2.26615	0.151474	2.18949	0.424175	1.69965	0.23186	1.31565	0.261208	0.699141	0.0538962	0.43171	0.0510152	2.73083	0.403415	2.19814	0.284477	1.57767	0.386709	1.16867	0.182844	0.976761	0.0894518	0.830381	0.209317	0.135406	0.0304548	0.0197484	0.0144793	0.0104894	0.782807	0.0239517	0.00549825	7.2181e-05	3.77815e-05	0.13497	0.0232886	0.0036344
PC [26:1]	0.239546	0.0556403	0.16967	0.0237093	0.156723	0.0438273	0.117018	0.0117695	0.102773	0.0115196	0.0897773	0.00869667	0.225477	0.0341367	0.164095	0.0244542	0.145907	0.0318334	0.128195	0.0109902	0.120431	0.00405046	0.131945	0.019757	0.231736	0.0360014	0.236727	0.0108491	0.206698	0.0108928	0.161268	0.0258509	0.155545	0.036004	0.118461	0.0283192	0.115973	0.112808	0.0202676	0.0140397	0.0099836	0.0645379	0.0418584	0.00931905	0.00611693	0.0147639	0.829452	0.313128	0.0511722
PC [26:0]	1.17761	0.272309	0.78682	0.0175898	0.554068	0.0505017	0.451106	0.0382075	0.255522	0.0152127	0.215753	0.0559245	1.181	0.14814	0.754238	0.16471	0.583868	0.0794601	0.420443	0.0316822	0.255841	0.039774	0.213513	0.0107785	1.17889	0.213551	0.871522	0.126318	0.743296	0.156732	0.552272	0.130646	0.40309	0.0798942	0.402789	0.130009	0.0681762	0.0175476	0.010213	0.00424362	0.00389944	0.0289244	0.00354066	0.000962857	0.000474366	0.000351711	0.0984562	0.0464808	0.0122977
PC [28:1]	2.42762	0.558155	1.72882	0.142777	1.21314	0.106755	0.947191	0.0650046	0.478857	0.0322318	0.345573	0.0792092	2.45073	0.346382	1.60195	0.348857	1.18305	0.172243	0.805144	0.0836641	0.420677	0.0860872	0.300909	0.0244568	2.94331	0.409058	2.33696	0.289322	2.01907	0.330161	1.45688	0.272222	0.928015	0.135594	0.747189	0.213096	0.103553	0.0208052	0.0103139	0.00379531	0.00306651	0.0403204	0.00475427	0.00132477	0.000595522	0.000428616	0.104107	0.0382042	0.00634148
PC [28:0]	1.69172	0.452991	1.34974	0.05397	1.10647	0.145284	1.03105	0.113776	0.791752	0.0557845	0.735847	0.195128	1.82609	0.149083	1.38183	0.247369	1.28674	0.130994	1.13865	0.0560008	1.03336	0.112751	0.982673	0.0477677	1.67841	0.261035	1.49055	0.192592	1.48512	0.221552	1.28381	0.210193	1.31786	0.192481	1.38258	0.37208	0.263956	0.100115	0.0704443	0.0268962	0.0283922	0.0561422	0.00925825	0.00171089	0.00182878	0.000734155	0.372593	0.383528	0.111024
PC [30:1]	2.4403	0.543845	1.73068	0.100247	1.23066	0.116834	1.01268	0.0746665	0.620003	0.0494362	0.494583	0.117301	2.48469	0.286477	1.6108	0.331484	1.20354	0.163184	0.872256	0.0803875	0.555746	0.085621	0.461503	0.0215211	2.76893	0.462235	2.14524	0.336813	1.8724	0.334311	1.4384	0.254928	1.09659	0.154844	0.942161	0.253042	0.0903561	0.019663	0.0107859	0.00446856	0.00374916	0.0259408	0.00253864	0.000717807	0.000365146	0.000259299	0.131934	0.0528732	0.0120082
PC [30:0]	0.337876	0.0849058	0.300147	0.00997165	0.270422	0.0386171	0.271686	0.030702	0.257012	0.00925627	0.259074	0.0628216	0.383356	0.0203715	0.31251	0.0515855	0.316299	0.0299973	0.30857	0.00634959	0.355807	0.0248788	0.398097	0.0218292	0.315325	0.0479984	0.314466	0.0381366	0.343712	0.0425687	0.331804	0.0426315	0.398954	0.0467788	0.427584	0.100541	0.487229	0.278593	0.273003	0.176372	0.265864	0.0913748	0.0328039	0.00371959	0.211987	0.440673	0.981816	0.486171	0.679586
PC [32:1]	0.500834	0.111442	0.409609	0.0289187	0.315583	0.0536649	0.298278	0.0626134	0.243797	0.0500388	0.245819	0.0987655	0.457768	0.0741587	0.313951	0.066364	0.251928	0.0415798	0.204485	0.0419442	0.165014	0.0313506	0.165401	0.0107199	0.489869	0.0905441	0.405066	0.0468341	0.39842	0.0646382	0.350648	0.07401	0.379919	0.0615245	0.39462	0.116499	0.241864	0.0604213	0.0516584	0.0218793	0.0412977	0.0665474	0.0137684	0.00674855	0.00324847	0.00249996	0.223054	0.227608	0.108205
PC [32:0]	0.070207	0.0204096	0.0782984	0.00575996	0.082702	0.0131091	0.0941256	0.0120724	0.089258	0.00453994	0.0847896	0.0184719	0.0736398	0.00295264	0.075376	0.0129335	0.0841086	0.00850372	0.0856541	0.00250067	0.108736	0.0119882	0.118151	0.0134737	0.0522751	0.0166614	0.0650606	0.0127602	0.0870286	0.0159267	0.0907648	0.0114426	0.100233	0.0120826	0.0908498	0.0187051	0.544828	0.422711	0.155546	0.189665	0.410776	0.831792	0.114234	0.00577608	0.00790902	0.00502679	0.350843	0.0593212	0.0299813
PC [34:2]	1.73146	0.4491	1.10956	0.0774948	0.840999	0.128214	0.734398	0.0945641	0.546191	0.0383638	0.552113	0.162214	1.5494	0.127718	0.834611	0.121056	0.663992	0.0392953	0.54461	0.0222221	0.441932	0.0430951	0.414086	0.0382291	1.57966	0.227785	1.0737	0.136063	0.990344	0.162061	0.821405	0.129211	0.831278	0.121851	0.813465	0.176399	0.0773633	0.029869	0.019726	0.010381	0.0128692	0.00215102	0.000329033	0.000178086	0.000141609	0.000122969	0.0298534	0.0217468	0.00741133
PC [34:1]	4.4213	1.31948	4.51098	0.305959	4.84615	0.81808	5.63691	0.785342	6.48614	0.418546	7.04415	1.76295	3.95001	0.174887	3.49517	0.369614	4.00132	0.13128	4.33899	0.116799	5.35777	0.288318	5.74083	0.825854	3.09441	0.521443	3.61943	0.431867	4.71624	0.667782	5.20862	0.722173	7.2436	0.808781	8.21487	1.72665	0.914224	0.660225	0.242204	0.0610942	0.108079	0.126304	0.705218	0.0327871	0.00194076	0.0213088	0.250385	0.0295015	0.0147196
PC [34:0]	0.00132738	0.00125594	0.00864464	0.0014116	0.0175795	0.00541162	0.0308575	0.00765326	0.0226862	0.00237394	0.0139686	0.00608477	0.00606539	0.000493983	0.0154108	0.00665396	0.0349791	0.00686464	0.0482332	0.00291437	0.0985181	0.00697217	0.110641	0.0117901	0.00128938	0.00111937	0.00729713	0.00309863	0.0216063	0.00614571	0.0295667	0.00993268	0.0309172	0.0106249	0.0147692	0.00266112	0.00257093	0.00714537	0.00273851	0.000160963	0.02436	0.0722952	0.0018952	1.59234e-05	2.15058e-05	0.0001051	0.0342366	0.00488622	0.0080443
PC [36:2]	46.8509	11.0726	39.601	1.97675	35.167	3.36748	35.0084	3.95907	28.6935	1.75966	25.6972	6.37402	43.9822	2.62753	37.9596	4.06465	37.412	1.60972	35.2568	0.801802	35.7371	2.42291	35.6195	1.67738	41.3823	4.4213	39.3958	3.68536	42.1772	4.94249	38.9062	4.60887	38.37	3.88721	34.7053	7.09453	0.32678	0.155273	0.156046	0.0485586	0.0455708	0.0974045	0.0209627	0.0053236	0.0161889	0.00968665	0.582199	0.845662	0.538683
PC [36:1]	0.448677	0.158161	2.08892	0.275884	3.24095	0.633604	3.87175	0.533847	4.71636	0.120909	4.87112	0.966705	0.524277	0.044243	2.81256	0.479782	5.66147	0.397749	7.45579	0.144687	14.5168	0.561278	19.2937	1.55733	0.291683	0.11637	1.78767	0.173991	3.18302	0.25333	3.5389	0.296434	4.83462	0.422231	4.25476	0.673347	0.000868111	0.00177347	0.000440428	3.14176e-06	0.00144362	0.00119063	2.42265e-05	1.51179e-07	1.74123e-06	3.11679e-05	0.000244782	5.64468e-05	6.03731e-05
PC [38:2]	0.30104	0.0820657	0.340362	0.0126747	0.34402	0.0509827	0.358054	0.0398196	0.312917	0.0143652	0.272774	0.0588495	0.28631	0.0166776	0.308538	0.0401483	0.353711	0.0270721	0.355168	0.00841973	0.395943	0.0339642	0.424118	0.0341557	0.245626	0.0389785	0.316903	0.040337	0.382709	0.0543261	0.38156	0.0508593	0.397847	0.0500112	0.365414	0.0911956	0.458166	0.483968	0.339883	0.817123	0.653168	0.425865	0.021363	0.00308978	0.00739309	0.00328345	0.0925571	0.0237756	0.0213097
PC [40:2]	0.0464931	0.0274762	0.0615635	0.00627614	0.0560808	0.01405	0.0645748	0.0127571	0.053711	0.00828601	0.0394165	0.0181973	0.061355	0.0040023	0.0712034	0.0109268	0.0857834	0.00384719	0.0886424	0.000668864	0.0998643	0.00990348	0.104282	0.00707753	0.0409349	0.0198113	0.054845	0.0165993	0.0699993	0.0150546	0.0733002	0.0096946	0.0731915	0.010009	0.058018	0.0164624	0.406788	0.619044	0.359618	0.685587	0.728814	0.21656	0.00159112	0.000310586	0.00335249	0.0007937	0.404018	0.11309	0.0638711
PC [40:1]	0.000576213	0.000998031	0.00570772	0.00191368	0.00671581	0.00206594	0.0112377	0.00448328	0.014615	0.00441925	0.0147594	0.00530884	0.000990872	0.000859472	0.00579837	0.0021248	0.0226455	0.00625817	0.039161	0.00461763	0.103351	0.0103316	0.135889	0.00796797	0.000437365	0.000757539	0.00220892	0.00191739	0.00730139	0.00810583	0.0106145	0.00517451	0.0189802	0.00799255	0.0165702	0.0055816	0.0146353	0.0097716	0.0158579	0.00581862	0.0104359	0.0221025	0.0040342	0.000147843	6.85801e-05	8.24e-06	0.210881	0.217982	0.0280271
PC [42:1]	0.0567842	0.0249926	0.107717	0.00529031	0.161242	0.0342353	0.210241	0.0408566	0.254565	0.00208201	0.249497	0.0525903	0.0610557	0.0103851	0.156046	0.0239979	0.306102	0.0432808	0.421352	0.0273166	0.991354	0.110139	1.33647	0.0703341	0.0596732	0.0223639	0.107233	0.00845945	0.194681	0.00927715	0.223685	0.0306094	0.304097	0.0308444	0.267023	0.0481541	0.0259771	0.0129668	0.00515813	0.000166365	0.00458584	0.00325968	0.000675349	2.84387e-05	0.000129227	6.39302e-06	0.0261687	0.000642929	0.00169625
PC [44:1]	0.0272423	0.0185399	0.0299888	0.012609	0.029303	0.013778	0.050837	0.0143327	0.0578041	0.00493138	0.0526075	0.0169408	0.0387492	0.00840551	0.0474195	0.0133933	0.0758289	0.0107329	0.0941103	0.00759713	0.17679	0.014786	0.215023	0.0145263	0.0163876	0.0126607	0.0212123	0.0110096	0.0408722	0.0133076	0.0506154	0.0130932	0.0793583	0.0112986	0.0663842	0.0151261	0.842348	0.884687	0.156121	0.0508898	0.155132	0.396035	0.00923252	0.00106815	0.000148596	5.36951e-05	0.64457	0.082138	0.0312278
PC [46:1]	0.137253	0.0356507	0.147824	0.0134647	0.163177	0.031786	0.203246	0.0360828	0.233621	0.012974	0.212993	0.0457319	0.152998	0.0112082	0.18264	0.0250453	0.258505	0.0363172	0.305203	0.0190628	0.594688	0.0711377	0.737412	0.0360304	0.0944565	0.0407971	0.124547	0.017812	0.174849	0.0263641	0.199908	0.0296853	0.29494	0.0385838	0.258047	0.042541	0.656004	0.400408	0.0873147	0.0116942	0.0864546	0.134651	0.00859702	0.000283616	0.000444535	1.14794e-05	0.306682	0.0456234	0.0223556
PC [48:1]	0.273356	0.0701396	0.349369	0.0412222	0.410353	0.0694292	0.539684	0.0983235	0.62906	0.0546041	0.568097	0.122417	0.284729	0.031107	0.388992	0.0604276	0.590048	0.085521	0.674301	0.0533037	1.23172	0.16016	1.52683	0.0638724	0.200779	0.0694913	0.306131	0.0432358	0.468269	0.0709853	0.550221	0.0804048	0.84566	0.096211	0.7646	0.106249	0.180911	0.0740097	0.0187883	0.00227485	0.0223892	0.05656	0.00436408	0.000397486	0.000550542	7.08361e-06	0.089656	0.00956139	0.00469595
PC [50:1]	0.00336952	0.00411263	0.0173587	0.0081012	0.0220532	0.00937096	0.0451981	0.0170399	0.0546412	0.0139298	0.0419204	0.0136364	0.00286398	0.00311181	0.0150848	0.00626779	0.0427263	0.0140083	0.0500337	0.0115343	0.0965806	0.0144335	0.121156	0.00473913	0.00185149	0.00320687	0.0120116	0.0120068	0.0396133	0.017554	0.0496446	0.0150864	0.0870081	0.0148468	0.0786667	0.00974308	0.055984	0.0341117	0.0144578	0.00362271	0.00939142	0.038978	0.00857597	0.00239191	0.000389053	3.49978e-06	0.229711	0.0214798	0.0058184
PC	63.1854	15.2209	54.9328	2.32576	50.2354	5.6161	50.9885	5.90373	44.9148	2.38631	42.1019	10.2154	59.9837	4.03112	52.5078	6.44029	54.5646	2.97594	53.6357	0.870414	62.858	3.54746	68.5522	4.00124	56.6682	6.98397	54.6946	5.55456	59.6224	7.30155	55.71	6.91329	58.1917	6.07898	54.3841	11.2046	0.405785	0.238985	0.265319	0.109192	0.117167	0.163538	0.134322	0.0560331	0.406343	0.0592358	0.721154	0.639193	0.874088
LPE [16:1]	0.0592511	0.0128361	0.018716	0.00638566	0.00160786	0.00101841	0.000370689	0.000642053	0.000409323	0.000708967	0	0	0.0293787	0.00359694	0.0206536	0.00140398	0.00249103	0.0028602	0.000283211	0.000490536	0	0	0	0	0.0410154	0.0128001	0.0118926	0.00797555	0.00272907	0.00157283	0.000614222	0.000633289	0.000627904	0.000547567	0.000757789	0.000217081	0.00806068	0.00149079	0.00136552	0.00137035	0.001327	0.0173367	0.000533765	0.000156123	0.000144937	0.000144937	0.0287118	0.00678169	0.00546949
LPE [18:1]	1.89588	0.217543	0.868206	0.121345	0.53806	0.0468272	0.406136	0.0389007	0.360523	0.0320303	0.324268	0.0163481	1.53647	0.144064	1.12337	0.0842622	0.6844	0.0763516	0.496701	0.0634359	0.315946	0.0390027	0.252569	0.00834829	1.86173	0.226138	0.963449	0.0840991	0.581363	0.0862354	0.464035	0.0157701	0.410046	0.0257156	0.409453	0.0332799	0.00202904	0.0004535	0.000307637	0.000268127	0.000237262	0.0127752	0.000825481	0.000333048	0.000144239	0.00010347	0.00297627	0.000787548	0.000435512
LPE [20:1]	0.182147	0.024574	0.0726245	0.00955799	0.0283844	0.00829735	0.00855568	0.00497825	0.00380506	0.00259065	0.00472575	0.0018499	0.131814	0.0151426	0.0786726	0.00594915	0.038499	0.00427681	0.0202483	0.00793677	0.00237848	0.00138498	0.000708215	0.000343452	0.193908	0.0513432	0.0792859	0.00642457	0.0342916	0.00923814	0.0137594	0.00148394	0.0129974	0.00571825	0.0140258	0.00623031	0.00197787	0.000507238	0.000277182	0.000235557	0.000237852	0.00481063	0.000506536	0.000349208	0.000123177	0.000115318	0.0185099	0.00608922	0.00371019
LPE	2.13727	0.253893	0.959546	0.135114	0.568053	0.0542869	0.415062	0.0440207	0.364737	0.0351534	0.328993	0.018048	1.69766	0.156101	1.2227	0.089209	0.72539	0.0820143	0.517233	0.0709892	0.318324	0.0402361	0.253277	0.00826546	2.09665	0.285	1.05463	0.0936762	0.618384	0.0968664	0.478408	0.016206	0.423672	0.0293319	0.424237	0.0394597	0.00208668	0.000470584	0.00031812	0.000278426	0.000250578	0.0102174	0.000671441	0.000283498	0.000120684	8.91269e-05	0.00384454	0.0010477	0.000603209
PE [32:1]	0.163116	0.0380431	0.121803	0.0134326	0.0954388	0.0178197	0.0754625	0.0152679	0.0502706	0.012173	0.0390295	0.0137724	0.132584	0.0193314	0.0974334	0.0172414	0.0697944	0.00699264	0.0495164	0.00403919	0.0258995	0.0070104	0.0117483	0.000315875	0.172507	0.0133753	0.121255	0.0221239	0.102822	0.0132377	0.0807639	0.00360359	0.0656874	0.0179283	0.0625398	0.0200468	0.150808	0.0492971	0.02077	0.00808297	0.00603771	0.0784808	0.00612711	0.00188661	0.000848877	0.000413146	0.0264456	0.00303676	0.000329624
PE [34:2]	1.07938	0.367926	0.608266	0.12592	0.433604	0.110166	0.255841	0.0400927	0.157976	0.0638215	0.136414	0.00742365	0.682534	0.0534379	0.461013	0.0408889	0.297749	0.0807905	0.204332	0.0708886	0.0791684	0.0488606	0.0474021	0.0240884	0.756773	0.118848	0.539987	0.0385598	0.371156	0.0415209	0.25901	0.0517587	0.138318	0.0211086	0.17319	0.00048618	0.103848	0.0435769	0.0182388	0.0129112	0.0113496	0.0046751	0.0023382	0.000734612	0.000133958	4.74624e-05	0.0397395	0.006065	0.00265373
PE [34:1]	4.98951	1.17506	4.52317	0.233483	4.49217	0.262038	4.27573	0.637506	4.26086	0.430398	3.86357	0.898944	4.08735	0.477755	4.06857	0.474017	4.12005	0.132236	3.8265	0.165776	4.08929	0.65342	3.63893	0.402132	3.69727	0.502906	3.8863	0.483854	4.22638	0.485545	4.14696	0.391427	4.82425	0.647162	3.98629	0.83449	0.537131	0.513843	0.407419	0.370263	0.257868	0.963759	0.914562	0.422113	0.996896	0.281493	0.663388	0.26006	0.288724
PE [36:2]	16.95	3.202	11.7009	0.950115	9.83711	0.929549	8.15036	0.975113	6.49928	0.682909	5.70767	1.24693	15.5754	1.23918	11.8209	1.09029	10.5386	0.418889	9.01431	0.451721	8.29087	1.17367	7.17316	0.88572	15.6236	1.64226	12.6652	1.14243	11.6022	1.12776	9.95153	0.701753	9.53038	0.98832	8.06833	1.43682	0.0528746	0.0209268	0.01039	0.00522882	0.00478221	0.0169618	0.00262641	0.000997448	0.00178568	0.000670296	0.062549	0.0249807	0.00532465
PE [36:1]	0.289628	0.0948012	0.297613	0.0247992	0.371776	0.01621	0.416901	0.0705622	0.490931	0.0358172	0.516097	0.118895	0.350235	0.0336697	0.435203	0.0407855	0.599056	0.02018	0.700531	0.055976	1.32815	0.269637	1.48129	0.214384	0.222817	0.0383913	0.284737	0.0212778	0.390317	0.0212162	0.451505	0.0174142	0.712353	0.0839403	0.634745	0.106161	0.894577	0.213126	0.13556	0.0262815	0.0613565	0.0496831	0.000391069	0.000747425	0.00337432	0.000834029	0.0709478	0.00270911	0.000714955
PE [38:1]	0.00132757	0.00167224	0.00661956	0.00280118	0.015681	0.00398801	0.0178211	0.00521193	0.0246915	0.00281801	0.0271655	0.0107268	0.00237205	0.00130208	0.0118827	0.00380819	0.0283282	0.00123296	0.0393688	0.00468463	0.0940843	0.0106834	0.114898	0.0046562	0	0	0.00497635	0.000945253	0.0156512	0.00585205	0.0157535	0.00350756	0.0353312	0.00704172	0.0297377	0.010669	0.0483354	0.00453843	0.00643127	0.000247052	0.0145855	0.0149383	1.50272e-05	0.000191472	0.000122652	2.2628e-06	0.000802446	0.0097901	0.00147243
PE [40:1]	0.000254718	0.000441184	0	0	0.000191103	0.000331	0.00077441	0.00028117	0.00114092	0.000399726	0.000599536	0.000565743	0.000413185	0.000715657	0.000931232	0.000361605	0.000846032	0.000288871	0.00186337	0.00014316	0.0108796	0.00172643	0.0149434	0.00340155	0	0	0.00048594	0.00044288	0	0	0	0	0.00041174	0.000360169	0.000346913	0.000600871	0.373901	0.851404	0.160445	0.0614385	0.451958	0.325777	0.386341	0.0262552	0.000632249	0.00193127	0.130171
PE [42:1]	0.0178654	0.0165017	0.0112148	0.00281887	0.0161025	0.00807573	0.0184117	0.00787038	0.0221926	0.00923595	0.020133	0.0116749	0.0210167	0.0100341	0.0297879	0.00859687	0.0413828	0.0128248	0.0474897	0.0146656	0.0966641	0.0191321	0.104892	0.013692	0.00849956	0.00802148	0.00515508	0.0050031	0.0146398	0.00267951	0.0148792	0.00380854	0.0363205	0.0140318	0.0201134	0.00918316	0.529224	0.876059	0.961206	0.712094	0.855412	0.314307	0.0962088	0.0613028	0.00373223	0.00102349	0.573168	0.276969	0.281288
PE [44:1]	0.00883352	0.0103901	0.00340906	0.000783051	0.00367032	0.0027401	0.00369692	0.00197417	0.0053014	0.000513542	0.00278651	0.00262354	0.00710328	0.00639539	0.00978316	0.00470495	0.0107795	0.00490676	0.0124568	0.00658544	0.0389778	0.00561363	0.036885	0.00930994	0.00343373	0.00335028	0.00303107	0.00228028	0.00368203	0.00113042	0.00335503	0.00204185	0.00810759	0.00456739	0.00299597	0.00136794	0.418198	0.452065	0.44757	0.58807	0.383726	0.590187	0.473769	0.369586	0.00291031	0.0102846	0.87172	0.909059	0.973947
PE [46:1]	0.103041	0.0306663	0.0829469	0.00934541	0.0764038	0.0103809	0.0789125	0.0164846	0.0755253	0.0121082	0.0565539	0.0199369	0.0845112	0.0145073	0.0909374	0.0114749	0.101389	0.00497807	0.0974879	0.0103068	0.142119	0.0214733	0.145772	0.0152263	0.0635529	0.0187575	0.0661876	0.0147129	0.0830333	0.00782334	0.0696954	0.00568912	0.0858132	0.00666664	0.0516129	0.0206273	0.338686	0.227266	0.296224	0.221835	0.0925164	0.579783	0.129341	0.275192	0.0182973	0.00725525	0.857514	0.172214	0.616108
PE [48:1]	0.391595	0.0929815	0.314979	0.00607032	0.293273	0.0152908	0.299572	0.039641	0.267686	0.0307716	0.20049	0.0460918	0.28281	0.0384074	0.319642	0.0412926	0.350842	0.0206028	0.340724	0.00904371	0.458232	0.0697921	0.469601	0.0664323	0.275782	0.0509073	0.284621	0.0291235	0.347009	0.0486205	0.30533	0.0270871	0.307998	0.0210706	0.226737	0.0476097	0.227507	0.145006	0.189957	0.0935567	0.0332315	0.321181	0.0538929	0.0638305	0.0188736	0.0135191	0.806945	0.154562	0.424944
PE [50:1]	0.133169	0.0353021	0.104426	0.00980817	0.0888306	0.0141122	0.0845725	0.0167934	0.0750518	0.00647579	0.0494573	0.0243103	0.0942953	0.0217551	0.0956623	0.0188525	0.0912246	0.0138598	0.0805602	0.0200242	0.10896	0.019896	0.122675	0.0257366	0.10709	0.0275462	0.0949392	0.0235745	0.111623	0.00917722	0.0912514	0.00671605	0.107613	0.0058675	0.0827101	0.0311092	0.245793	0.1135	0.0976399	0.0485812	0.027716	0.9384	0.84671	0.466156	0.437524	0.218425	0.592736	0.800206	0.388059
PE	24.1277	4.96266	17.7754	1.26517	15.7243	1.26815	13.6781	1.78191	11.9309	1.25895	10.62	2.38542	21.3206	1.80203	17.4418	1.71746	16.25	0.57689	14.4151	0.666693	14.7633	2.21682	13.3622	1.61395	20.9313	2.24336	17.9569	1.76052	17.2685	1.65534	15.39	1.14664	15.8526	1.76969	13.3393	2.51204	0.0981626	0.0467902	0.026474	0.014539	0.0131681	0.0541611	0.0097221	0.00339125	0.0164622	0.00468747	0.14512	0.0852052	0.018948
DMPE [36:2]	2.8075	0.85661	1.29398	0.171503	0.915751	0.0991813	0.61715	0.112802	0.438551	0.0516102	0.525378	0.139769	2.83055	0.665618	1.28554	0.277894	0.857825	0.093187	0.668536	0.0518173	0.502908	0.0757445	0.460632	0.0672438	3.65471	1.04518	1.53258	0.387756	1.17312	0.162191	0.880718	0.140495	1.00899	0.180947	1.05498	0.251503	0.0399122	0.0191087	0.011774	0.0087672	0.0103846	0.0206537	0.00706205	0.00496335	0.00383996	0.00357646	0.0300131	0.0153007	0.01037
DMPE	2.8075	0.85661	1.29398	0.171503	0.915751	0.0991813	0.61715	0.112802	0.438551	0.0516102	0.525378	0.139769	2.83055	0.665618	1.28554	0.277894	0.857825	0.093187	0.668536	0.0518173	0.502908	0.0757445	0.460632	0.0672438	3.65471	1.04518	1.53258	0.387756	1.17312	0.162191	0.880718	0.140495	1.00899	0.180947	1.05498	0.251503	0.0399122	0.0191087	0.011774	0.0087672	0.0103846	0.0206537	0.00706205	0.00496335	0.00383996	0.00357646	0.0300131	0.0153007	0.01037
MMPE [36:2]	1.04341	0.289425	0.517248	0.0255361	0.392543	0.0229553	0.281101	0.0569839	0.203909	0.026291	0.236028	0.0706526	1.05337	0.25397	0.512268	0.0856313	0.438977	0.0165483	0.367589	0.0263861	0.351725	0.0913781	0.306467	0.0415066	1.19943	0.224514	0.616921	0.121471	0.549765	0.0772007	0.429997	0.069981	0.4994	0.106368	0.476466	0.0941143	0.0349619	0.0177976	0.0110231	0.00747268	0.0093506	0.0249669	0.0139042	0.0096474	0.010801	0.0073483	0.0167833	0.00903997	0.00478145
MMPE	1.04341	0.289425	0.517248	0.0255361	0.392543	0.0229553	0.281101	0.0569839	0.203909	0.026291	0.236028	0.0706526	1.05337	0.25397	0.512268	0.0856313	0.438977	0.0165483	0.367589	0.0263861	0.351725	0.0913781	0.306467	0.0415066	1.19943	0.224514	0.616921	0.121471	0.549765	0.0772007	0.429997	0.069981	0.4994	0.106368	0.476466	0.0941143	0.0349619	0.0177976	0.0110231	0.00747268	0.0093506	0.0249669	0.0139042	0.0096474	0.010801	0.0073483	0.0167833	0.00903997	0.00478145
LPI [16:0]	0.0482165	0.0258832	0.0597091	0.00676776	0.0670165	0.0170425	0.0408388	0.0119918	0.0288761	0.00935622	0.016779	0.0164664	0.0327595	0.00740351	0.0560351	0.0122222	0.0693015	0.0144932	0.0774651	0.0117969	0.0586564	0.0294126	0.024645	0.00503797	0.0490995	0.00727478	0.0791707	0.00710857	0.0978998	0.00336294	0.0962325	0.020655	0.0688706	0.00772304	0.0597196	0.0170248	0.49818	0.352666	0.677375	0.290446	0.150561	0.047768	0.0177053	0.00512461	0.213255	0.191621	0.00688239	0.000457223	0.0203334
LPI [18:1]	1.36012	0.216265	0.852408	0.115848	0.572785	0.145921	0.453267	0.0541508	0.371481	0.0515679	0.274254	0.0143585	0.913844	0.155603	0.943082	0.183193	0.646496	0.159005	0.505329	0.155713	0.363676	0.124667	0.245975	0.0637806	1.11495	0.0634068	0.909846	0.0819982	0.636186	0.0116157	0.596344	0.0672705	0.568122	0.0195861	0.632368	0.0154142	0.023078	0.00639628	0.00213964	0.00152913	0.000970668	0.843423	0.105854	0.0324568	0.00878	0.0023403	0.0266009	0.000210539	0.000628045
LPI [18:0]	0.000976064	0.000853836	0.00135839	0.00139562	0.00163736	5.71796e-05	0.0017222	0.000511473	0.00123941	0.00118767	0	0	0.00176902	0.000564385	0.00552547	0.000909083	0.013818	0.00140059	0.0184138	0.00402944	0.0203904	0.0065072	0.0105487	0.00143662	0.00138185	0.00124072	0.003206	0.000516047	0.0038719	0.00190458	0.00483338	0.00141181	0.00190528	0.000374432	0.00268716	0.00164708	0.706369	0.251752	0.263938	0.770742	0.118802	0.00369712	0.00015887	0.00209446	0.00782793	0.00059534	0.0784075	0.130631	0.0335118
LPI	1.40931	0.242542	0.913476	0.116948	0.641439	0.162821	0.495828	0.065972	0.401597	0.0553488	0.291033	0.0257072	0.948373	0.148456	1.00464	0.195302	0.729616	0.167332	0.601208	0.165182	0.442722	0.140015	0.281168	0.0678225	1.16543	0.0587952	0.992222	0.0816188	0.737957	0.0142751	0.69741	0.0872951	0.638898	0.0276459	0.694774	0.0320469	0.0332329	0.0103954	0.00325461	0.00217349	0.00136142	0.711442	0.16555	0.0536771	0.0127281	0.0021002	0.0406386	0.000256027	0.00152901
PI [26:0]	0.35543	0.0482315	0.25864	0.0436543	0.182469	0.0403808	0.113746	0.0122034	0.0151166	0.0080282	0.00289039	0.00267072	0.305696	0.0314226	0.245036	0.0314661	0.176316	0.00439888	0.107601	0.0237434	0.014409	0.0048301	0.00555081	0.00347242	0.352324	0.0723558	0.305447	0.0284268	0.253487	0.0410228	0.155072	0.0323222	0.0452912	0.0251862	0.0154268	0.00867835	0.0615186	0.00888895	0.0010922	0.00027151	0.000225502	0.0774348	0.00212003	0.000956061	9.21434e-05	8.00681e-05	0.355242	0.108677	0.012534
PI [28:1]	0.216347	0.029133	0.118504	0.0175199	0.0460393	0.00623595	0.0157435	0.00647625	0.00238165	0.00259079	0.00164565	0.00151762	0.210788	0.025533	0.151685	0.0189762	0.0824803	0.0217502	0.0437592	0.0238022	0.0055865	0.00488361	0.00254634	0.000853767	0.273043	0.0556172	0.179389	0.0187281	0.125122	0.0313341	0.0649496	0.0220927	0.0157086	0.00787299	0.00479076	0.00417697	0.00757012	0.00058406	0.000311123	0.000223409	0.000218201	0.0323439	0.00269135	0.00115707	0.000165755	0.000146092	0.0506359	0.0159506	0.00382906
PI [28:0]	1.15944	0.184131	0.943925	0.11054	0.792074	0.177708	0.63034	0.0464715	0.374081	0.0629914	0.218938	0.0232465	1.15948	0.120236	1.0831	0.143079	1.00055	0.0283069	0.878195	0.00766094	0.714017	0.0889104	0.541443	0.0564482	1.23014	0.238994	1.13618	0.115645	1.05949	0.146837	0.86194	0.104152	0.566727	0.0959998	0.361152	0.0759538	0.157191	0.0677393	0.00848784	0.00220411	0.000929058	0.51808	0.089764	0.0155553	0.00669985	0.00128736	0.573045	0.351447	0.0707301
PI [30:1]	0.29152	0.0472816	0.182925	0.0204963	0.119693	0.016261	0.0661403	0.0131316	0.0144989	0.00564253	0.00772225	0.0053278	0.294908	0.0305494	0.227178	0.0237258	0.152277	0.0151323	0.111468	0.0192734	0.0510836	0.0273761	0.0302478	0.0104907	0.359339	0.0684355	0.269324	0.0268946	0.220408	0.0297052	0.137475	0.0242202	0.0704358	0.027391	0.0235985	0.00987784	0.021773	0.00399773	0.00135251	0.000545658	0.000495393	0.0386726	0.00192498	0.000921388	0.000502095	0.000143135	0.101302	0.0321123	0.00611401
PI [30:0]	0.44192	0.0732468	0.387214	0.0386445	0.344464	0.05642	0.290355	0.0309834	0.197977	0.0312322	0.122226	0.0249017	0.466816	0.0379906	0.467979	0.0443066	0.481666	0.0176237	0.461923	0.0264306	0.468665	0.0577658	0.402182	0.0417193	0.455818	0.0822046	0.451413	0.0359126	0.443496	0.0626155	0.383949	0.0381871	0.298224	0.0409368	0.196536	0.0431937	0.316373	0.141933	0.0299092	0.00606165	0.0020166	0.974114	0.572308	0.863619	0.965282	0.118256	0.9363	0.846463	0.241595
PI [32:1]	0.950985	0.183627	0.76467	0.0793261	0.640072	0.11278	0.54174	0.0568229	0.388964	0.0681587	0.299523	0.0393386	0.729605	0.0529395	0.64096	0.0597239	0.559722	0.041779	0.470719	0.0462837	0.385717	0.0281122	0.31691	0.0122887	0.857041	0.150775	0.787951	0.0700085	0.721592	0.0971788	0.598846	0.0570445	0.500131	0.065237	0.405634	0.0681328	0.181976	0.0668395	0.0210621	0.00765203	0.00386236	0.126714	0.0120327	0.00310256	0.000575922	0.000192994	0.511426	0.261018	0.0501182
PI [34:2]	0.48006	0.0891493	0.349566	0.038013	0.292124	0.0574208	0.240753	0.0209181	0.183161	0.0297236	0.145469	0.0297393	0.351314	0.0102243	0.301003	0.0146168	0.24478	0.029252	0.201731	0.0178619	0.171634	0.0222209	0.147609	0.00722065	0.425357	0.0734206	0.375996	0.022831	0.337885	0.0372398	0.284341	0.0281213	0.261146	0.0232451	0.224381	0.040762	0.0800625	0.0373037	0.0106057	0.00542639	0.00351095	0.00812998	0.0039916	0.000229191	0.000219824	9.42447e-06	0.328489	0.139544	0.0359898
PI [34:1]	44.6962	7.94196	42.0238	3.32961	38.694	3.61203	37.1909	4.28057	32.5256	3.80049	27.1889	4.03303	34.3676	2.13572	35.1636	3.12684	35.1368	1.02508	32.7387	1.41487	37.0017	3.6674	35.2934	2.09531	34.6149	5.32423	38.5501	2.18668	40.3145	4.88896	37.1868	3.19311	38.4192	4.16488	33.5325	5.6488	0.619428	0.299298	0.223057	0.0748211	0.0271685	0.734197	0.603864	0.332593	0.342881	0.620406	0.301893	0.243774	0.512706
PI [36:2]	21.2837	3.48343	15.7739	0.998179	13.0424	1.46127	11.1778	1.65063	8.54269	0.996214	7.7273	1.82519	19.2682	1.30204	17.5617	1.62142	14.6552	0.837229	12.1647	0.459773	11.7397	1.64857	11.3481	0.937219	19.8018	3.30581	17.8678	1.5101	16.8391	2.0362	14.5521	1.54969	15.416	1.84985	14.1206	2.55684	0.0579647	0.0194565	0.0104897	0.00367391	0.00395288	0.228278	0.00669113	0.000876973	0.00342713	0.00102688	0.408842	0.256791	0.0674488
PI [36:1]	6.04072	1.60664	5.80084	0.365093	5.77384	0.343881	5.6927	1.16781	5.04278	0.701443	4.05879	0.8621	7.33406	0.589649	9.18957	0.842896	11.347	0.583249	12.0985	1.05549	16.9149	1.85796	17.3473	1.21092	4.94481	0.863116	5.7632	0.541564	6.80014	0.776731	6.45119	0.463313	7.4464	0.746963	5.73331	1.08245	0.813337	0.792405	0.776651	0.379969	0.132863	0.0353806	0.00110896	0.00240933	0.00104438	0.000209715	0.236569	0.0504591	0.0561881
PI	75.9164	13.475	66.6039	4.64292	59.9272	5.74271	55.9602	7.2744	47.2872	5.65061	39.7734	6.68136	64.4884	4.20811	65.0319	5.91758	63.8368	2.4962	59.2773	2.9281	67.4675	7.29681	65.4353	4.26578	63.3145	10.1863	65.6868	4.45926	67.1152	8.09317	60.6767	5.42979	63.0393	6.89316	54.6179	9.49107	0.321006	0.131648	0.0869475	0.0274379	0.0141201	0.903112	0.828888	0.153109	0.573274	0.797868	0.730479	0.639476	0.712445
LPS [18:1]	0.783198	0.141401	0.563225	0.193027	0.379261	0.172989	0.226964	0.0539746	0.152273	0.0285643	0.115539	0.0155389	0.597199	0.23545	0.671782	0.155042	0.499492	0.222616	0.32556	0.110095	0.172846	0.034989	0.121872	0.029731	0.507843	0.179339	0.43019	0.104279	0.259714	0.0782724	0.186877	0.0508123	0.129419	0.0169871	0.112178	0.0214109	0.186531	0.0351378	0.00312291	0.00162821	0.0012455	0.670574	0.629066	0.144521	0.0366534	0.025604	0.552104	0.093031	0.0406391
LPS	0.783198	0.141401	0.563225	0.193027	0.379261	0.172989	0.226964	0.0539746	0.152273	0.0285643	0.115539	0.0155389	0.597199	0.23545	0.671782	0.155042	0.499492	0.222616	0.32556	0.110095	0.172846	0.034989	0.121872	0.029731	0.507843	0.179339	0.43019	0.104279	0.259714	0.0782724	0.186877	0.0508123	0.129419	0.0169871	0.112178	0.0214109	0.186531	0.0351378	0.00312291	0.00162821	0.0012455	0.670574	0.629066	0.144521	0.0366534	0.025604	0.552104	0.093031	0.0406391
PS [34:1]	7.18781	1.24577	6.34117	0.49132	6.22598	0.560426	5.82878	0.754909	5.00827	0.869863	3.54351	0.475625	5.94639	0.682197	5.50535	0.613235	4.58702	0.361758	3.8755	0.323959	4.43012	0.209981	4.50783	0.0149462	5.0471	0.983174	5.06042	0.627036	5.71652	1.08801	5.16008	0.602121	5.00528	0.494824	3.66643	0.698217	0.335008	0.289623	0.181401	0.0678769	0.00907995	0.451813	0.0380598	0.00897403	0.0212161	0.0217423	0.98516	0.473369	0.873452
PS [36:2]	7.30458	1.30636	6.8722	0.59297	6.44331	0.617693	5.40334	0.76506	3.59494	0.571505	2.50828	0.316933	6.35865	0.855298	7.52571	1.05231	6.16186	0.269251	5.14358	0.257299	5.35783	0.488613	4.94568	0.166098	5.87621	1.17703	6.61715	0.797896	7.27674	1.42993	5.89393	0.829999	4.81908	0.42173	3.3207	0.613012	0.629232	0.360235	0.0952526	0.0107718	0.00348303	0.210312	0.723168	0.0779756	0.153249	0.0483702	0.417824	0.260426	0.984019
PS [36:1]	0.573878	0.0997341	0.620804	0.0517036	0.800309	0.0977863	0.789786	0.0898683	0.701391	0.0577035	0.564736	0.101401	0.768907	0.0424825	0.96304	0.062866	1.13519	0.138002	1.23975	0.19825	2.10581	0.169504	2.17512	0.141251	0.404511	0.0851803	0.573963	0.0181492	0.880374	0.20566	0.872324	0.133982	0.96961	0.113488	0.69238	0.0689248	0.509418	0.0484212	0.0495358	0.127744	0.916716	0.0114076	0.0117488	0.0158343	0.000187426	7.87657e-05	0.028044	0.020787	0.00696526
PS	15.0663	2.64186	13.8342	1.12583	13.4696	1.25916	12.0219	1.57579	9.3046	1.49215	6.61652	0.871356	13.0739	1.53919	13.9941	1.70853	11.8841	0.711119	10.2588	0.760991	11.8938	0.775307	11.6286	0.23336	11.3278	2.2437	12.2515	1.43647	13.8736	2.71397	11.9263	1.53539	10.794	0.998427	7.67951	1.37976	0.498682	0.398182	0.161648	0.0302413	0.0062501	0.526411	0.291002	0.0468797	0.301227	0.183107	0.580517	0.278711	0.722368
PG [34:1]	0.0231874	0.0158616	0.00888272	0.00429079	0.00625674	0.00212605	0.0067453	0.00313959	0.00601798	0.0052336	0.0074377	0.00469981	0.0161486	0.00764598	0.00724029	0.00510232	0.00129093	0.00160437	0.00152766	0.000448421	0.00202372	0.000566541	0.00488366	0.000494106	0.0157296	0.00858877	0.00581061	0.00460179	0.00578552	0.00337081	0.00375482	0.00220533	0.00631215	0.00433098	0.00539979	0.00414607	0.206082	0.140835	0.152991	0.149607	0.174499	0.168537	0.0301028	0.0297543	0.0331855	0.0635381	0.152649	0.135339	0.0794637
PG [36:2]	0.0213032	0.0161433	0.00462092	0.0015525	0.00348899	0.000878646	0.00156732	0.00162701	0.00190232	0.00112642	0.00162468	0.00153653	0.0230586	0.00805691	0.00766904	0.00341371	0.00258652	0.00111352	0.00190984	0.00165417	0.00349335	0.00175514	0.00438509	0.000846728	0.0227819	0.00990781	0.0043858	0.00216558	0.00350351	0.00118407	0.00135999	0.00118734	0.00241537	0.00302832	0.0013329	0.000234001	0.149396	0.128969	0.102858	0.106442	0.103437	0.0381679	0.012066	0.0112155	0.0147358	0.0162325	0.0347881	0.0286652	0.0205047
PG [36:1]	0.00394963	0.0050031	0.00041361	0.000716394	0.00126754	0.000217737	0.000888986	0.00153977	0.00168314	0.000791353	0.00056954	0.000986472	0.00586212	0.0045868	0.00156441	0.00212926	0.000990505	0.000857803	0.00352246	0.00134665	0.010752	0.00608511	0.0158403	0.00487431	0.00189996	0.00164563	0.000338078	0.000585569	0.00114348	0.00105001	0.000325565	0.000563895	0.00216694	0.000773964	0	0	0.292276	0.406096	0.36848	0.481596	0.314931	0.214995	0.144842	0.444345	0.328674	0.0611869	0.196359	0.538858	0.192047
PG	0.0484402	0.036813	0.0139172	0.00543795	0.0110133	0.00306661	0.00920161	0.00594344	0.00960344	0.00638341	0.00963191	0.00695565	0.0450693	0.0197583	0.0164737	0.010525	0.00486796	0.003368	0.00695997	0.00343694	0.016269	0.0082396	0.0251091	0.00561943	0.0404115	0.0201074	0.0105345	0.00711818	0.0104325	0.00538215	0.00544037	0.00279024	0.0108945	0.00724464	0.00673269	0.0041462	0.18336	0.154139	0.14245	0.14617	0.147232	0.0913793	0.0254903	0.0301783	0.0802357	0.167662	0.0722872	0.0671553	0.0405853
LPA [18:1]	0.0416366	0.0308027	0.0381797	0.00928234	0.00840732	0.00101791	0.00671239	0.00291369	0.00793704	0.00674002	0.00671614	0.00671409	0.03217	0.0146603	0.0514935	0.00953656	0.0340963	0.00609834	0.0203211	0.00844393	0.0160098	0.0080532	0.00953881	0.00307476	0.0323156	0.0237018	0.0356416	0.00711057	0.0208019	0.00938816	0.0148421	0.00759462	0.0135366	0.00683648	0.00854855	0.00448984	0.861408	0.135225	0.122243	0.137807	0.127485	0.128197	0.843842	0.291838	0.169561	0.0589943	0.827342	0.477781	0.290834
LPA	0.0416366	0.0308027	0.0381797	0.00928234	0.00840732	0.00101791	0.00671239	0.00291369	0.00793704	0.00674002	0.00671614	0.00671409	0.03217	0.0146603	0.0514935	0.00953656	0.0340963	0.00609834	0.0203211	0.00844393	0.0160098	0.0080532	0.00953881	0.00307476	0.0323156	0.0237018	0.0356416	0.00711057	0.0208019	0.00938816	0.0148421	0.00759462	0.0135366	0.00683648	0.00854855	0.00448984	0.861408	0.135225	0.122243	0.137807	0.127485	0.128197	0.843842	0.291838	0.169561	0.0589943	0.827342	0.477781	0.290834
PA [34:1]	0.1824	0.0410722	0.119308	0.0172427	0.111897	0.0199382	0.133618	0.027464	0.176078	0.00592345	0.197052	0.0173457	0.170036	0.0326312	0.0922094	0.0143709	0.0827939	0.0178596	0.0670137	0.0225787	0.0990369	0.0376086	0.106188	0.012172	0.158185	0.0382941	0.125566	0.0217339	0.140274	0.0149239	0.147622	0.027345	0.20911	0.0103976	0.186265	0.0551447	0.0702011	0.0555343	0.162423	0.804893	0.599669	0.0194256	0.0153215	0.0108487	0.0689634	0.0336869	0.268755	0.492376	0.717236
PA [36:2]	0.834281	0.134145	0.725353	0.045996	0.747235	0.0456394	0.735735	0.0945899	0.809074	0.118159	0.775318	0.0676614	0.973509	0.0658415	0.661239	0.0163544	0.669859	0.0125301	0.594862	0.042694	0.692587	0.144612	0.646452	0.129037	1.00523	0.150414	0.939042	0.00723833	1.01203	0.0333815	0.980344	0.0583627	1.10288	0.0177692	0.876776	0.17346	0.254162	0.347286	0.357117	0.81907	0.533972	0.00134138	0.00142462	0.00112067	0.0375773	0.0173875	0.488873	0.94273	0.80253
PA [36:1]	0.110809	0.0501964	0.168615	0.0256098	0.157296	0.0235166	0.158933	0.0285281	0.195401	0.0156941	0.204906	0.020635	0.128402	0.0498928	0.183948	0.0461079	0.216502	0.0208208	0.216767	0.0164465	0.322621	0.0478381	0.35736	0.0413796	0.0794498	0.0394721	0.154986	0.0191956	0.194632	0.0129558	0.187215	0.0213222	0.233136	0.0136079	0.16377	0.0495066	0.150255	0.220001	0.222325	0.0495205	0.0398241	0.229662	0.0477061	0.0435289	0.00823895	0.0036146	0.0407071	0.00863448	0.0141388
PA	1.12749	0.213465	1.01328	0.0550295	1.01643	0.00956414	1.02829	0.127753	1.18055	0.135831	1.17728	0.105629	1.27195	0.090591	0.937396	0.0463163	0.969154	0.0458608	0.878642	0.075884	1.11424	0.22802	1.11	0.178302	1.24287	0.226108	1.21959	0.0354469	1.34694	0.0203893	1.31518	0.0736432	1.54512	0.0182619	1.22681	0.274243	0.420241	0.418884	0.527742	0.734809	0.735629	0.00469598	0.00667455	0.0044938	0.327979	0.2334	0.86875	0.471638	0.62625
CL [62:2]	0.0594339	0.0102556	0.0496384	0.0042645	0.0424558	0.000817869	0.0440321	0.00468558	0.0348923	0.00533861	0.0215529	0.00566496	0.0481267	0.0093773	0.0457601	0.0103698	0.0415348	0.00492272	0.0353342	0.0098559	0.0396364	0.0119804	0.0281414	0.0057991	0.0530458	0.010527	0.0538655	0.00556804	0.0649837	0.011268	0.0584538	0.00803845	0.054383	0.00780773	0.0339532	0.00739341	0.20134	0.0460071	0.077161	0.0212692	0.00499177	0.78396	0.341689	0.178706	0.388486	0.0348626	0.910854	0.251036	0.518472
CL [62:1]	0.0637561	0.0137692	0.0516935	0.00382875	0.0443391	0.000823715	0.0452486	0.00502653	0.0406403	0.00206146	0.029771	0.00810983	0.0582574	0.0090505	0.0539522	0.00741597	0.0512688	0.00665574	0.0436807	0.00895921	0.051596	0.0122592	0.046761	0.00862017	0.0550673	0.00937759	0.0612408	0.00533001	0.0654432	0.011394	0.0571845	0.00806279	0.0616523	0.0034164	0.0446881	0.00962726	0.217579	0.071352	0.0940151	0.0452077	0.0211373	0.558583	0.341914	0.118455	0.491096	0.186348	0.377642	0.290206	0.78159
CL [64:3]	0.0383867	0.00835317	0.0332721	0.00239973	0.0236896	0.000914884	0.0246746	0.00355466	0.016108	0.00319277	0.00755485	0.00460955	0.0359345	0.00750658	0.0356589	0.00854015	0.0337592	0.00689604	0.0266726	0.00853236	0.026598	0.0111129	0.0159194	0.00393553	0.04216	0.00878814	0.0444436	0.0060906	0.0511014	0.00959121	0.0413584	0.00667105	0.0365266	0.00351878	0.0162603	0.00796446	0.365696	0.0388048	0.0590344	0.0124959	0.00500067	0.968533	0.730407	0.230911	0.294321	0.0149728	0.730193	0.299662	0.905939
CL [64:2]	0.118358	0.0237853	0.0982215	0.0117218	0.0832985	0.00683759	0.0877108	0.00746857	0.077308	0.0151693	0.04993	0.00954704	0.111199	0.0179337	0.10743	0.0158349	0.109517	0.00573002	0.0929945	0.00681792	0.108827	0.0201761	0.0906922	0.0138154	0.111065	0.0175292	0.117597	0.0102474	0.131467	0.0288276	0.116865	0.00501037	0.117114	0.00774349	0.084787	0.0127895	0.258731	0.0701658	0.100291	0.0653317	0.00984881	0.79848	0.884514	0.175639	0.886405	0.191734	0.607107	0.354051	0.610981
CL [64:1]	0.070334	0.0132478	0.0527216	0.000875193	0.0458556	0.00646161	0.0474198	0.00838569	0.0469329	0.0037385	0.0347935	0.00960667	0.0758028	0.0128631	0.0712694	0.00987473	0.0701343	0.00306126	0.0619592	0.00222301	0.0731015	0.0138578	0.0674021	0.0091332	0.0625583	0.0111551	0.0673751	0.00399601	0.0725148	0.0120292	0.0619629	0.00510804	0.0754835	0.00291332	0.0553663	0.0128657	0.0831502	0.0451737	0.0645714	0.0421984	0.0197456	0.653556	0.499004	0.14011	0.816743	0.408557	0.5202	0.352484	0.937054
CL [66:3]	0.0358679	0.0089197	0.0304599	0.00490889	0.0242533	0.00261545	0.0223896	0.00173256	0.0193037	0.00386523	0.00910564	0.00360535	0.0315672	0.00927825	0.0308678	0.00554777	0.0281949	0.00632132	0.0242812	0.00699325	0.0266913	0.0114217	0.0211308	0.00471929	0.0384561	0.00704871	0.0353259	0.00707659	0.0439545	0.0099265	0.0376286	0.00040924	0.0352714	0.00421406	0.0184067	0.00773045	0.409631	0.0964308	0.0620296	0.0419156	0.00853508	0.91617	0.630348	0.338479	0.596754	0.157475	0.616089	0.477781	0.849057
CL [66:2]	0.111079	0.0216893	0.0881566	0.0111974	0.0745183	0.00335792	0.0800197	0.00891601	0.0764794	0.0112571	0.0556987	0.0123903	0.0994716	0.0200698	0.0896128	0.0118349	0.0922271	0.00638968	0.0746857	0.0093858	0.0873034	0.0195735	0.0818573	0.0136255	0.0940807	0.0157303	0.0972503	0.0123135	0.109102	0.0274955	0.0987327	0.0100556	0.10275	0.00752514	0.0771603	0.0123007	0.179157	0.0447746	0.0834825	0.0702627	0.0184577	0.504257	0.583415	0.124715	0.493993	0.276924	0.79707	0.457597	0.688293
CL [66:1]	0.0258312	0.00992109	0.0184072	0.000996625	0.0138552	0.00290561	0.0177467	0.00489941	0.0150777	0.00426956	0.012639	0.00501634	0.0378427	0.0085453	0.0321644	0.00481797	0.0340482	0.00301075	0.0267412	0.00391768	0.033411	0.00960933	0.0329633	0.00611475	0.0250236	0.00559858	0.0203175	0.00351081	0.0274866	0.00604332	0.0206945	0.00580707	0.0265562	0.00186666	0.0189562	0.00603411	0.266696	0.115255	0.27438	0.159712	0.109026	0.372797	0.50837	0.110257	0.582705	0.466306	0.284925	0.63189	0.405221
CL [68:3]	0.0799545	0.019516	0.0682156	0.00543662	0.0579943	0.0026145	0.0604792	0.00798485	0.0536561	0.00644065	0.0356537	0.0103192	0.0527876	0.0102843	0.0502304	0.00845517	0.0472821	0.008579	0.0424534	0.00801689	0.0494416	0.0123634	0.0439681	0.00573341	0.0620838	0.0136355	0.0641934	0.00875995	0.0727738	0.0131718	0.0659287	0.00629393	0.068624	0.00693683	0.0473362	0.0119959	0.37235	0.125566	0.184909	0.0909734	0.0254501	0.756082	0.515783	0.241786	0.73679	0.26427	0.832674	0.384045	0.680378
CL [68:2]	0.351136	0.0854361	0.271804	0.0039432	0.243922	0.00444049	0.274191	0.0417332	0.30262	0.0312124	0.268317	0.0603977	0.209949	0.028073	0.199725	0.0233778	0.200844	0.0120099	0.17758	0.00327428	0.214803	0.0396695	0.195279	0.0238404	0.219598	0.0438415	0.231797	0.0261182	0.256997	0.044279	0.239513	0.0244764	0.296496	0.0201559	0.271091	0.0506593	0.183422	0.095743	0.233649	0.407854	0.242262	0.653224	0.63277	0.118302	0.871066	0.528198	0.70008	0.357248	0.52986
CL [70:4]	0.0480385	0.0145352	0.0387058	0.00472012	0.0332956	0.00103411	0.0340898	0.00513836	0.0282024	0.00610246	0.0194807	0.00726885	0.0313463	0.00837738	0.0312384	0.00377148	0.030084	0.00446633	0.0237429	0.00688556	0.0304252	0.00807977	0.0268063	0.00270228	0.0365622	0.00671929	0.0404129	0.00304688	0.045156	0.00719814	0.0373333	0.00634942	0.0415229	0.00364912	0.0238894	0.00728507	0.349824	0.154587	0.192152	0.0948037	0.0382652	0.984744	0.829148	0.291363	0.897586	0.422169	0.417114	0.205162	0.892106
CL [70:3]	0.798874	0.207078	0.627332	0.0283881	0.555706	0.0184702	0.604119	0.080206	0.598731	0.0579445	0.469799	0.103126	0.53441	0.0987406	0.51112	0.0649067	0.52246	0.0402713	0.45848	0.0277816	0.554031	0.117578	0.500536	0.0694412	0.55486	0.130505	0.580241	0.0736584	0.665209	0.103603	0.595032	0.0496397	0.714272	0.0594674	0.557546	0.12304	0.228218	0.112741	0.203379	0.18223	0.0694042	0.749992	0.855558	0.269056	0.83567	0.65236	0.783849	0.315312	0.644414
CL [70:2]	0.504882	0.141745	0.371884	0.0148845	0.333293	0.0162607	0.37826	0.0662704	0.41266	0.0417302	0.356867	0.0915031	0.454702	0.0599674	0.44171	0.0398923	0.445777	0.0104288	0.401508	0.0122468	0.521536	0.0855109	0.511408	0.0493494	0.332867	0.0710139	0.335512	0.0373429	0.379536	0.0566732	0.350733	0.0283157	0.473602	0.0245729	0.377152	0.0854991	0.181338	0.105655	0.233648	0.340506	0.203252	0.770323	0.812041	0.206691	0.329859	0.274651	0.957196	0.423906	0.706355
CL [72:4]	0.451917	0.108815	0.351069	0.02793	0.307401	0.0152341	0.323434	0.0393459	0.299629	0.0325686	0.223232	0.0431196	0.362761	0.0672567	0.352355	0.0493911	0.36142	0.0255105	0.315523	0.0229693	0.372984	0.0862023	0.333464	0.0537322	0.358229	0.0809967	0.381619	0.0413899	0.429934	0.0693751	0.382806	0.0340101	0.411453	0.0341215	0.296838	0.0614498	0.194958	0.0849643	0.126796	0.0809365	0.0276811	0.839569	0.975791	0.313773	0.879198	0.587234	0.679072	0.308914	0.653312
CL [72:3]	0.587402	0.15855	0.427919	0.0182546	0.37881	0.0120598	0.41385	0.0664714	0.412328	0.0348393	0.329539	0.0831581	0.644033	0.0920508	0.616508	0.0537128	0.631983	0.0309331	0.569127	0.0232355	0.725728	0.153549	0.691729	0.0707342	0.449899	0.107284	0.453447	0.0574246	0.514911	0.0839725	0.468469	0.0307145	0.55998	0.0393884	0.41393	0.0815389	0.15853	0.0855225	0.155288	0.135143	0.0671473	0.677791	0.840346	0.243533	0.473521	0.515997	0.962142	0.454964	0.787492
CL [72:2]	0.142184	0.0390466	0.107047	0.00841813	0.101065	0.002616	0.103178	0.0155595	0.115589	0.00964964	0.09795	0.0281533	0.217612	0.0177114	0.213888	0.00970227	0.225005	0.01444	0.213347	0.0110292	0.310331	0.0474996	0.340227	0.0378576	0.109851	0.0234167	0.10398	0.00830048	0.118742	0.0192967	0.112259	0.00285675	0.151087	0.00972552	0.116246	0.0222579	0.202279	0.142898	0.183258	0.315971	0.186692	0.765458	0.605117	0.741186	0.0339256	0.00707441	0.70332	0.638475	0.868232
CL	3.48744	0.865937	2.68655	0.103046	2.36375	0.0688509	2.56084	0.364814	2.55016	0.252156	2.02188	0.481379	3.0058	0.471562	2.88349	0.321873	2.92554	0.157796	2.58811	0.136458	3.22644	0.658048	3.02828	0.371066	2.60541	0.554326	2.68862	0.300191	3.04931	0.509426	2.74495	0.217197	3.22677	0.223457	2.45361	0.518451	0.186882	0.0885706	0.162824	0.146241	0.0624971	0.729417	0.793671	0.21456	0.661485	0.95137	0.830368	0.364868	0.705538
LCL [52:2]	0.0750538	0.0145238	0.0362832	0.0181702	0.00980861	0.00568801	0.00520895	0.00308763	0.0055397	0.00176994	0.00412351	0.0020816	0.0303643	0.0045906	0.0368909	0.00572962	0.0148262	0.00645102	0.00655515	0.00301025	0.0070564	0.00360588	0.00899977	0.00240657	0.0352414	0.0110753	0.0235629	0.00557302	0.00550837	0.00483225	0.00207677	0.00108952	0.00543629	0.00132464	0.00314927	0.00211263	0.0447039	0.00192637	0.00123504	0.00118892	0.00111265	0.198467	0.0273003	0.00168052	0.00229381	0.00203584	0.178124	0.0130338	0.00669043
LCL [54:3]	0.07745	0.0155783	0.0415691	0.0199171	0.0105077	0.00745827	0.00536169	0.00241323	0.00491401	0.00176571	0.00266197	0.00125488	0.0416578	0.00674496	0.0496073	0.00665009	0.0225383	0.00859771	0.00882979	0.00577443	0.00877725	0.00238031	0.00747229	0.00227206	0.0447478	0.0102906	0.028374	0.00811137	0.00900691	0.00531448	0.00527026	0.0027913	0.00465829	0.000982011	0.00187109	0.00114053	0.0698567	0.00256316	0.00137508	0.00131543	0.00115682	0.219712	0.0387633	0.00305427	0.00134796	0.00114051	0.0964138	0.00590549	0.00303823
LCL [54:2]	0.0396529	0.0175105	0.0162462	0.00994808	0.00347805	0.00314119	0.00116784	0.000715067	0.00129905	0.00102434	0.0010794	0.000188428	0.0277072	0.00531931	0.0326801	0.00483011	0.0118511	0.00490239	0.00522835	0.00300156	0.00557116	0.00293146	0.00427919	0.00142429	0.0201213	0.0058089	0.00993186	0.00263853	0.00216777	0.00103939	0.000698954	0.000753035	0.00108588	0.000447864	0.000571077	0.000571535	0.114396	0.0244055	0.0190448	0.0193137	0.0188544	0.296773	0.0191606	0.0031063	0.00322046	0.0018072	0.0505266	0.00621405	0.00455515
LCL	0.192157	0.0475332	0.0940985	0.0479859	0.0237943	0.0161839	0.0117385	0.00603574	0.0117528	0.00447491	0.00786488	0.00323651	0.0997293	0.015702	0.119178	0.0166279	0.0492156	0.019851	0.0206133	0.0113032	0.0214048	0.00868178	0.0207512	0.00594484	0.10011	0.0271374	0.0618688	0.0159274	0.0166831	0.010985	0.00804599	0.00396345	0.0111805	0.00270719	0.00559144	0.00352686	0.0657358	0.00437393	0.00285424	0.00281732	0.00258222	0.214755	0.0258938	0.00209754	0.00163988	0.00123496	0.103069	0.00784066	0.00435525
Sph [20:1:2]	0.182165	0.019809	0.231737	0.0150683	0.176522	0.0230623	0.151929	0.00559031	0.0933472	0.00978391	0.0850343	0.0138964	0.189312	0.0434186	0.218616	0.0349864	0.207119	0.0119982	0.161553	0.00739828	0.132659	0.0118562	0.118589	0.00889502	0.144885	0.0146153	0.257101	0.00135691	0.227894	0.00359046	0.186206	0.0226953	0.123313	0.00364179	0.096359	0.0212591	0.0260589	0.763946	0.0636824	0.00223605	0.00224854	0.414177	0.531157	0.336349	0.094725	0.0506488	0.000187944	0.000670599	0.0569046
Sph [20:0:2]	0.160789	0.0409547	0.15779	0.0137335	0.128032	0.00687508	0.108852	0.0135668	0.0744097	0.0271402	0.0686427	0.0288833	0.26575	0.269256	0.146371	0.0168875	0.122518	0.00628906	0.0976107	0.0108618	0.0712733	0.00657742	0.0739635	0.026755	0.1313	0.020461	0.195128	0.0140664	0.148152	0.0111979	0.145594	0.0278356	0.116397	0.0523283	0.0942087	0.0413353	0.91007	0.243636	0.105417	0.0382082	0.0333847	0.486153	0.409116	0.340631	0.27923	0.286879	0.0112255	0.278993	0.513197
Sph [20:0:3]	0.835783	0.177568	1.54475	0.127215	0.927095	0.0300459	0.683282	0.0493189	0.263588	0.0147855	0.235383	0.06476	0.806072	0.104785	1.53848	0.207867	1.31053	0.0801375	0.879199	0.0938692	0.467125	0.0402685	0.407302	0.0188558	0.689452	0.0398356	1.5144	0.0400764	1.1597	0.0184731	0.743129	0.0509143	0.460173	0.0399918	0.358377	0.100306	0.00492287	0.429421	0.225069	0.00511635	0.00532122	0.00550826	0.00269479	0.418851	0.0063847	0.00291106	1.4524e-05	4.97175e-05	0.223777
Sph	1.17874	0.224974	1.93428	0.127486	1.23165	0.0580008	0.944063	0.0415604	0.431345	0.0515105	0.38906	0.104613	1.26113	0.407233	1.90346	0.240332	1.64017	0.0904852	1.13836	0.0998042	0.671057	0.0582738	0.599855	0.0142115	0.965637	0.0634637	1.96663	0.02548	1.53574	0.010882	1.07493	0.0985293	0.699882	0.0927403	0.548944	0.161478	0.00717677	0.713362	0.150267	0.00496336	0.00528367	0.0782759	0.19066	0.638724	0.0678888	0.048275	1.4375e-05	0.000105473	0.181572
Cer [38:1:2]	0.880093	0.215689	0.832439	0.106768	0.890223	0.113249	0.918707	0.120208	0.878617	0.191607	0.724774	0.0964246	0.695927	0.0465936	0.758428	0.0295767	0.865172	0.0839564	0.868369	0.0956254	1.21942	0.114784	1.38473	0.0611255	0.684887	0.0756031	0.788548	0.0376576	0.957123	0.147858	0.926535	0.0606384	0.921547	0.105355	0.800677	0.151431	0.748896	0.946039	0.799901	0.993356	0.318415	0.121335	0.0379184	0.0484226	0.00185386	0.000100548	0.100689	0.0468963	0.0124609
Cer [38:0:2]	0.301742	0.0834051	1.28589	0.332178	0.970253	0.28404	0.620651	0.10748	0.279198	0.120211	0.330038	0.0668848	0.169576	0.0115779	0.908848	0.0221818	1.2162	0.219701	1.10815	0.220706	1.19467	0.0881609	0.991055	0.107548	0.23602	0.0556127	1.21581	0.205661	1.06868	0.364468	0.601557	0.188776	0.282756	0.0621749	0.370331	0.049559	0.0076131	0.0173735	0.0153465	0.802754	0.670449	8.72664e-07	0.00118305	0.00181958	3.7118e-05	0.000192929	0.00134579	0.0173683	0.0323677
Cer [38:0:3]	0.203909	0.0518537	0.421234	0.063441	0.396347	0.0820825	0.316154	0.0279826	0.137795	0.0554538	0.066901	0.0120827	0.138196	0.0117241	0.3227	0.0241882	0.406167	0.0399623	0.385064	0.017771	0.39895	0.0174729	0.310068	0.0241755	0.172267	0.0196773	0.424732	0.0486389	0.487803	0.131347	0.371163	0.0915701	0.161964	0.057719	0.117237	0.00951045	0.0100761	0.0264619	0.0299478	0.205963	0.0111857	0.000286666	0.000368903	3.62744e-05	2.78646e-05	0.000377418	0.00113273	0.0146723	0.0212382
Cer [44:0:3]	0.3568	0.0894667	0.934868	0.0803971	0.767055	0.0692696	0.604681	0.0509149	0.399569	0.093002	0.396375	0.0730724	0.304196	0.0406749	1.15782	0.185341	1.72988	0.121981	1.61425	0.0755343	1.72905	0.184948	1.44213	0.138382	0.247329	0.0462262	0.840013	0.111182	0.766112	0.201134	0.468763	0.126772	0.355599	0.0690725	0.439918	0.0634532	0.00113799	0.00328263	0.014022	0.596686	0.584844	0.0014633	4.33256e-05	1.21442e-05	0.000200075	0.000166103	0.00103854	0.0121194	0.0467567
Cer [44:0:4]	6.37883	0.873961	6.07714	0.385804	7.05409	0.66336	7.58876	0.96164	6.40251	0.574863	4.27247	0.864195	5.589	0.807419	5.80062	0.980021	7.08213	0.423635	7.52925	0.727117	11.1525	2.23213	11.0098	1.55037	4.83514	0.726389	6.15629	0.435131	8.84395	1.36806	8.28002	0.680318	7.99436	0.518181	5.5597	1.0694	0.613473	0.346504	0.182098	0.97061	0.0412124	0.787187	0.0470429	0.0364723	0.0153532	0.00580228	0.0539566	0.0109671	0.00389363
Cer	8.12138	1.27318	9.55157	0.487842	10.078	0.52227	10.049	0.96712	8.09768	1.02694	5.79056	1.04021	6.8969	0.818888	8.94842	1.10508	11.2996	0.0277472	11.5051	0.500429	15.6946	2.44554	15.1378	1.62742	6.17565	0.877141	9.4254	0.814944	12.1237	2.20677	10.648	1.13247	9.71622	0.805695	7.28786	1.33096	0.143402	0.069495	0.105048	0.981188	0.0700284	0.0611042	0.000741717	0.00114176	0.00410715	0.00143313	0.00930003	0.012269	0.00566252
IPC [38:1:2]	0.301391	0.0522973	0.207726	0.00316153	0.169047	0.0111302	0.153765	0.0288352	0.12599	0.0110329	0.108525	0.048841	0.22892	0.0210681	0.167918	0.0214562	0.145182	0.0216657	0.106043	0.00951838	0.114494	0.0264536	0.0976005	0.0193792	0.209809	0.0447813	0.193405	0.00559133	0.176711	0.0265163	0.145047	0.0222565	0.148806	0.0187988	0.140791	0.0292744	0.0363459	0.0127754	0.0128318	0.00472961	0.00953007	0.0245901	0.0086523	0.000773478	0.00423138	0.00135857	0.56312	0.332482	0.0883186
IPC [44:0:3]	0.0178751	0.0175887	0.0385163	0.0110348	0.0427017	0.00503799	0.0407779	0.0179995	0.0158778	0.00874269	0.0101504	0.00862351	0.0146495	0.007004	0.0643127	0.0226213	0.0977505	0.0301072	0.0865811	0.0246594	0.114817	0.031968	0.0992221	0.0247733	0.00978207	0.00504387	0.0293419	0.0116078	0.0566048	0.00968068	0.0432183	0.00808351	0.0230124	0.00978819	0.0149346	0.00502537	0.160205	0.0784898	0.190092	0.868755	0.532109	0.0221119	0.0096153	0.00827839	0.00608142	0.00471189	0.0554116	0.00175226	0.00370243
IPC [44:0:4]	0.595844	0.0758228	0.67388	0.0272625	0.74738	0.103647	0.940581	0.115112	0.875754	0.115461	0.607329	0.104815	0.61424	0.0637412	0.755356	0.092135	0.921345	0.0321708	0.908044	0.0365865	1.23858	0.197684	1.33145	0.197547	0.461839	0.114229	0.748393	0.0547235	1.06593	0.240205	1.11321	0.124859	1.26574	0.176548	0.901427	0.165487	0.168757	0.110463	0.0123318	0.0246755	0.885237	0.0945708	0.0017342	0.00228354	0.00648799	0.0039195	0.0172688	0.0170489	0.00263018
IPC [44:0:5]	0.140446	0.0299298	0.11808	0.0149899	0.105757	0.0317271	0.138095	0.0406688	0.14831	0.0198642	0.120615	0.0358646	0.115881	0.0213277	0.129846	0.0236074	0.130975	0.0237972	0.116439	0.0297766	0.169163	0.0412185	0.171969	0.0382545	0.093992	0.0301455	0.126695	0.0225875	0.155936	0.0304694	0.159499	0.0172489	0.219097	0.0251076	0.179015	0.0492444	0.311559	0.240405	0.939594	0.723804	0.502934	0.489437	0.459234	0.980223	0.11765	0.0908091	0.207088	0.0665402	0.0308816
IPC	1.05556	0.159344	1.0382	0.0290674	1.06489	0.110658	1.27322	0.200255	1.16593	0.110807	0.846619	0.190189	0.973691	0.104532	1.11743	0.154978	1.29525	0.0236207	1.21711	0.0586977	1.63705	0.296184	1.70024	0.266105	0.775423	0.177928	1.09783	0.0610494	1.45518	0.290178	1.46098	0.144038	1.65665	0.208819	1.23617	0.244016	0.861813	0.937611	0.214704	0.38038	0.218446	0.253736	0.0065291	0.0245213	0.021616	0.0116766	0.0411991	0.0258423	0.00657463
MIPC [44:0:3]	0.118413	0.0366626	0.0949695	0.015484	0.0670762	0.0107291	0.0679008	0.0246596	0.0372694	0.00868273	0.0209254	0.0178586	0.102872	0.026559	0.111165	0.0238158	0.103197	0.0262588	0.0814377	0.0276742	0.0802416	0.0316348	0.0702965	0.0149597	0.0812984	0.0329655	0.08761	0.0229709	0.102494	0.0281771	0.0749823	0.0180494	0.0515058	0.0208571	0.0239552	0.0134728	0.365277	0.0804552	0.118785	0.0202917	0.0143704	0.707816	0.988702	0.387902	0.396375	0.13783	0.799028	0.444932	0.785459
MIPC [44:0:4]	11.5475	1.78304	9.44421	0.0663596	8.11322	0.795984	9.2188	1.58103	8.22589	1.15439	6.40409	1.50006	9.61479	0.859814	9.39365	1.02408	9.33387	0.338882	8.1026	0.290758	9.15486	1.48376	8.51593	1.11102	8.07607	2.51724	9.61841	0.938206	11.1174	2.83621	10.2321	1.21628	10.9315	1.78407	8.5165	2.0444	0.110721	0.0381647	0.165791	0.0536176	0.0187252	0.788762	0.626403	0.0447566	0.666425	0.246953	0.376305	0.23714	0.252556
MIPC [44:0:5]	0.260366	0.0265685	0.211228	0.0156256	0.175374	0.0220843	0.202178	0.0412948	0.18312	0.0241043	0.136002	0.0540046	0.210448	0.0269233	0.217769	0.0334939	0.198863	0.0415593	0.177151	0.031922	0.203635	0.0467116	0.184507	0.0262116	0.220281	0.0709969	0.255875	0.0210541	0.288115	0.062177	0.268598	0.0301171	0.263898	0.0430047	0.202796	0.0804441	0.0507827	0.0130435	0.10938	0.0203036	0.0231887	0.782626	0.706042	0.239399	0.837469	0.29782	0.451931	0.281104	0.338877
MIPC	11.9263	1.84449	9.75041	0.0560735	8.35567	0.811116	9.48888	1.64494	8.44628	1.1802	6.56101	1.57126	9.92811	0.911188	9.72258	1.08061	9.63593	0.388701	8.36119	0.349683	9.43874	1.56105	8.77073	1.15043	8.37765	2.61896	9.96189	0.976127	11.508	2.92475	10.5757	1.25989	11.2469	1.84196	8.74325	2.13366	0.110652	0.0373179	0.162779	0.0512355	0.0185341	0.813572	0.636361	0.0497797	0.663531	0.243712	0.381802	0.239409	0.260362
DG [28:1]	0.200381	0.0290968	0.106922	0.0096196	0.0835574	0.00939408	0.0751607	0.00951206	0.0591601	0.00571664	0.0440181	0.0120393	0.172714	0.0190147	0.118592	0.0309049	0.104884	0.0106828	0.0834282	0.00579842	0.0623415	0.0105395	0.0492343	0.0067543	0.232185	0.0340232	0.148169	0.0159726	0.132681	0.0223172	0.105874	0.0113857	0.0909814	0.00367984	0.0680647	0.0151382	0.00616111	0.00270345	0.0020951	0.00117815	0.0010043	0.0611069	0.00574293	0.00147226	0.000922533	0.000448496	0.017968	0.01331	0.00365878
DG [28:0]	0.340105	0.0656638	0.146906	0.00810816	0.115938	0.0104843	0.10979	0.0101838	0.111577	0.0101759	0.099793	0.0229479	0.320612	0.0237345	0.191487	0.0414603	0.186515	0.0128771	0.177791	0.0142949	0.170696	0.0138967	0.161994	0.00997396	0.341055	0.0306826	0.184606	0.00500221	0.161625	0.0111958	0.137389	0.0129722	0.136127	0.00386661	0.105887	0.0169344	0.00719207	0.00428855	0.00387455	0.00398643	0.00392086	0.00943713	0.00100394	0.000870199	0.000701889	0.000436784	0.000954112	0.000681005	0.000450046
DG [30:1]	0.238848	0.0138555	0.108632	0.00740289	0.112944	0.0253196	0.0733165	0.0145511	0.0804444	0.0168286	0.0626119	0.0417991	0.185654	0.0120756	0.133322	0.0506384	0.126083	0.0248483	0.100432	0.00710023	0.0818742	0.0108276	0.0729044	0.0109616	0.228931	0.0335083	0.201697	0.0395358	0.136952	0.0151732	0.119518	0.00473143	0.113065	0.0265747	0.0721834	0.0117389	0.000136757	0.00164445	0.000140101	0.000229354	0.00227393	0.156623	0.0202128	0.000458783	0.000377	0.000278744	0.414223	0.0123394	0.00499205
DG [30:0]	0.201032	0.00937947	0.0861462	0.00768863	0.0999209	0.0128961	0.0738836	0.00897085	0.0918268	0.0107771	0.0901337	0.0305795	0.171066	0.0130494	0.120674	0.0442986	0.123734	0.0256217	0.115946	0.0247932	0.119602	0.0160275	0.123791	0.020294	0.166533	0.0130587	0.15533	0.0211979	0.100058	0.0170386	0.0976678	0.00365792	0.106626	0.0105558	0.0702523	0.0127991	8.07838e-05	0.000390585	7.07322e-05	0.000188087	0.00387009	0.13175	0.0463389	0.0270891	0.0125177	0.0274352	0.479288	0.00583293	0.000921704
DG [32:1]	0.228707	0.060003	0.0810203	0.0171504	0.134819	0.0373987	0.0686227	0.0280663	0.116226	0.0390617	0.104388	0.0729139	0.11826	0.0212887	0.0784843	0.035157	0.115173	0.0549447	0.0765152	0.0291979	0.0727043	0.0236785	0.0722517	0.0193351	0.123023	0.0162577	0.254414	0.0863544	0.106294	0.0111375	0.108254	0.0158739	0.139087	0.0488631	0.070259	0.0175999	0.0148653	0.0829378	0.0138539	0.0529275	0.0847568	0.169003	0.932074	0.115992	0.0683553	0.0502826	0.0606926	0.215422	0.323232
DG [32:0]	0.187691	0.0470961	0.0937393	0.0273574	0.147319	0.0265829	0.102398	0.0121409	0.130412	0.00686725	0.135438	0.0294681	0.1329	0.0260322	0.127312	0.0394649	0.149304	0.0432937	0.116582	0.0512432	0.123482	0.0395537	0.148737	0.0643384	0.104711	0.015699	0.23019	0.0300967	0.124864	0.0402318	0.119637	0.0236017	0.150604	0.0221902	0.0813171	0.0378393	0.0404275	0.265636	0.0384963	0.105485	0.178626	0.8478	0.60385	0.648668	0.747821	0.712851	0.0030564	0.464275	0.413347
DG [34:1]	1.40274	0.288635	0.800956	0.00914306	0.820595	0.0620973	0.790519	0.129708	0.878983	0.182684	0.789497	0.244675	1.0713	0.0328458	0.900488	0.291926	0.853563	0.080248	0.800316	0.066206	0.886268	0.0651219	0.909892	0.127353	1.03291	0.084773	0.9258	0.0367995	0.880585	0.0196011	0.802878	0.0730482	0.918202	0.123787	0.775518	0.156425	0.0225687	0.0268981	0.0285415	0.0566413	0.0484595	0.370852	0.0121625	0.00314953	0.0117448	0.100692	0.115139	0.0386966	0.0235776
DG [34:0]	0.130119	0.0315474	0.0729862	0.0186463	0.105565	0.0185398	0.0847914	0.0150761	0.110819	0.0142415	0.104067	0.0096021	0.10587	0.0241013	0.107118	0.0377503	0.108097	0.0193518	0.0956361	0.0358624	0.114658	0.0220279	0.141073	0.0515121	0.0758775	0.00988707	0.149398	0.023202	0.0895868	0.0305052	0.099813	0.0117041	0.109566	0.0119121	0.0673839	0.0228931	0.0540752	0.309755	0.0880941	0.388853	0.243027	0.963796	0.906694	0.702669	0.665345	0.344041	0.00723565	0.50012	0.0537655
DG [36:2]	5.55826	1.25543	4.0215	0.13037	3.22692	0.325233	3.25486	0.469167	3.10684	0.420761	2.64833	0.687513	5.00219	0.217484	4.79217	0.620552	5.33079	0.143294	5.12804	0.161307	5.27356	0.29849	5.12123	0.44211	5.13505	0.621481	4.13722	0.454081	4.06853	0.603934	3.73042	0.579314	3.73769	0.430627	3.17378	0.643026	0.102625	0.0357457	0.0408684	0.032689	0.0244228	0.609578	0.0941841	0.465937	0.272065	0.697105	0.0880901	0.100023	0.0457667
DG [36:1]	1.32531	0.316375	1.34741	0.072962	1.37284	0.244135	1.60269	0.312224	1.89343	0.581277	1.33573	0.325342	1.41078	0.0913193	2.68531	0.252339	4.14163	0.141431	4.92928	0.267108	6.74131	0.460484	6.50803	0.653701	1.01983	0.0577459	1.44704	0.296401	1.5913	0.12728	1.55772	0.19107	1.57368	0.188434	1.04947	0.185188	0.911859	0.84687	0.340578	0.211256	0.970204	0.00119048	9.54818e-06	2.72304e-05	3.94224e-05	0.000180657	0.0704194	0.00209854	0.00953671
DG	9.81319	1.88017	6.86622	0.0607792	6.22041	0.532044	6.23604	0.977769	6.57972	1.24872	5.414	1.4685	8.69135	0.240733	9.25496	1.25044	11.2398	0.464355	11.624	0.63222	13.6465	0.880461	13.3091	1.27394	8.4601	0.82526	7.83386	0.573741	7.39248	0.659024	6.87917	0.799966	7.07562	0.807161	5.53411	0.994228	0.0533494	0.033385	0.0430865	0.0681131	0.0330933	0.486057	0.0010799	0.00168374	0.000712989	0.0035055	0.341237	0.154847	0.075787
TG [44:2]	0.33651	0.0495844	0.284035	0.0258461	0.26045	0.0237113	0.231427	0.0277884	0.227506	0.0163886	0.224166	0.0796498	0.223465	0.0270194	0.220376	0.0302964	0.250816	0.0378265	0.20903	0.00461904	0.221344	0.0358876	0.22894	0.0289599	0.213163	0.0241915	0.270703	0.0155589	0.276538	0.0363346	0.244988	0.0221364	0.25611	0.0214354	0.225812	0.0522952	0.179387	0.0746054	0.0328338	0.0224504	0.106749	0.901532	0.365769	0.413311	0.938752	0.822516	0.0257016	0.0657293	0.168055
TG [44:1]	0.519363	0.0353737	0.484824	0.0255678	0.543649	0.0390957	0.495271	0.0664553	0.506121	0.0297555	0.454945	0.206498	0.315262	0.0718233	0.372333	0.0525347	0.511743	0.104235	0.432766	0.00728697	0.515525	0.0911591	0.532081	0.0708491	0.278144	0.024622	0.495846	0.0573338	0.528928	0.0844725	0.519507	0.0352739	0.556261	0.0381207	0.426552	0.0825298	0.242368	0.46965	0.60891	0.64581	0.622547	0.328906	0.0547462	0.0478677	0.0403855	0.0204318	0.00378198	0.00783512	0.000627693
TG [44:0]	0.363547	0.037616	0.192075	0.00447165	0.23394	0.0151979	0.196869	0.0424283	0.272366	0.0249447	0.277879	0.12405	0.255976	0.0442977	0.153147	0.0162268	0.211242	0.0700274	0.170041	0.0101563	0.264739	0.0429306	0.339072	0.0327868	0.196786	0.0163771	0.222618	0.0653411	0.194215	0.0224119	0.205976	0.0209257	0.265165	0.0333024	0.210349	0.0293252	0.00142929	0.00521336	0.00702437	0.0249181	0.316183	0.0195144	0.402695	0.030642	0.817747	0.0593219	0.542886	0.880306	0.581428
TG [46:2]	0.690554	0.0169752	1.02797	0.0974242	1.09222	0.0768214	1.08338	0.0643884	0.929827	0.0334131	0.688823	0.226193	0.424754	0.0937971	0.837865	0.122566	1.16347	0.167866	1.08047	0.0673908	1.20991	0.215399	1.10447	0.107621	0.410563	0.0696208	1.11403	0.0163114	1.3934	0.26116	1.39175	0.0711947	1.27901	0.0455711	0.877298	0.183586	0.00410417	0.000902921	0.000516975	0.000380297	0.990086	0.00976234	0.00264937	0.000599717	0.00442642	0.00117924	6.95671e-05	0.00324768	6.91322e-05
TG [46:1]	1.38191	0.146364	1.31199	0.060019	1.40616	0.13127	1.36759	0.145132	1.39151	0.0293817	1.14323	0.408735	0.966311	0.162366	1.16347	0.134599	1.58944	0.23895	1.48442	0.0566479	2.01211	0.265753	2.06669	0.116967	0.891195	0.0683853	1.36633	0.138324	1.5699	0.117647	1.53082	0.0242027	1.6869	0.0469963	1.20013	0.180839	0.486611	0.841314	0.910005	0.916685	0.394907	0.180714	0.0201924	0.00643428	0.00434978	0.000678514	0.00595205	0.000987469	0.000107214
TG [46:0]	0.630111	0.0903114	0.338957	0.0132088	0.387283	0.0363994	0.35785	0.0560582	0.50611	0.0133837	0.478503	0.167433	0.531759	0.0651726	0.32095	0.0252566	0.430299	0.09627	0.417998	0.0193479	0.82896	0.0773622	1.10843	0.0461752	0.376819	0.0453845	0.382409	0.0843409	0.341718	0.0373116	0.385494	0.0451634	0.525715	0.0208756	0.382684	0.0424852	0.00524106	0.0124524	0.0113653	0.0783019	0.239603	0.00641008	0.205165	0.0441916	0.00703694	0.000235232	0.924341	0.359233	0.825972
TG [48:2]	0.844346	0.104871	0.83971	0.0277975	1.1277	0.00583161	0.943392	0.141488	0.904554	0.038153	0.721758	0.36064	0.471207	0.155817	0.75842	0.120057	1.20019	0.268572	1.06059	0.0292012	1.23059	0.255433	1.13925	0.184618	0.414659	0.0320127	1.01457	0.0928761	1.24396	0.177538	1.24558	0.0465209	1.21329	0.116357	0.769311	0.113192	0.944552	0.00949954	0.385172	0.402966	0.602046	0.0647325	0.0152675	0.00299203	0.0117284	0.00871411	0.000452102	0.00134794	1.40778e-05
TG [48:1]	1.00042	0.0513342	0.60999	0.014507	0.888883	0.0147226	0.67943	0.156595	0.83829	0.0594753	0.759246	0.404267	0.629097	0.179394	0.569153	0.0707501	0.932651	0.289707	0.798813	0.0179248	1.1592	0.225964	1.20689	0.15229	0.4924	0.0418287	0.712703	0.104119	0.783299	0.104409	0.832806	0.0825023	0.974993	0.157419	0.651767	0.0820005	0.00022299	0.0224056	0.0279465	0.0232844	0.363273	0.618863	0.197709	0.178334	0.033459	0.0131281	0.027261	0.010993	0.00310733
TG [48:0]	0.347434	0.0203479	0.165302	0.00821498	0.239616	0.0139884	0.184707	0.0420429	0.27113	0.0226468	0.261166	0.106572	0.278241	0.0587879	0.154908	0.0149325	0.232555	0.0830135	0.208274	0.0205957	0.36319	0.0475448	0.46926	0.0205955	0.184318	0.0068846	0.211361	0.0385383	0.191879	0.00642857	0.225553	0.061619	0.27895	0.0356331	0.188758	0.0208255	0.000136054	0.00163827	0.00380217	0.012243	0.240497	0.0244085	0.48006	0.123595	0.123519	0.00604046	0.297572	0.236772	0.313523
TG [50:3]	0.290016	0.082025	0.092919	0.016338	0.261707	0.0695523	0.114648	0.0697832	0.178565	0.0397743	0.180982	0.143095	0.128989	0.0650232	0.06679	0.0105994	0.180167	0.11899	0.120145	0.0597127	0.125161	0.0638999	0.123782	0.0778077	0.0888645	0.00351072	0.173738	0.0620759	0.141134	0.0285281	0.139288	0.026027	0.200666	0.138659	0.110784	0.052106	0.0150768	0.672091	0.0478051	0.101617	0.316066	0.17734	0.548967	0.870671	0.945522	0.933406	0.0772921	0.034523	0.0292294
TG [50:2]	0.863301	0.104116	0.457219	0.0184741	0.77387	0.0823709	0.546234	0.170558	0.669049	0.0669612	0.639903	0.348241	0.406241	0.166808	0.325829	0.0416592	0.661236	0.307146	0.49937	0.0815831	0.557188	0.151254	0.523884	0.149908	0.299157	0.0178654	0.554611	0.114488	0.598277	0.0953169	0.585542	0.0497261	0.758949	0.218961	0.510273	0.0923063	0.0026527	0.308122	0.0514655	0.0530993	0.347072	0.463335	0.27499	0.434037	0.310169	0.41497	0.0188031	0.0059157	0.000717365
TG [50:1]	0.903146	0.357234	0.390435	0.00995168	0.556454	0.0142062	0.449811	0.120716	0.649846	0.0638018	0.664185	0.275963	0.435634	0.123665	0.289228	0.0336802	0.523018	0.23396	0.400382	0.0304055	0.537623	0.108064	0.573865	0.0801213	0.318886	0.0196194	0.414584	0.0618498	0.478741	0.0991757	0.477662	0.0445265	0.682903	0.0942321	0.525091	0.0603678	0.0678529	0.168332	0.105745	0.29324	0.411082	0.119005	0.597971	0.656643	0.342641	0.179522	0.0630047	0.0519749	0.00482789
TG [50:0]	0.152851	0.0140111	0.0805992	0.00340364	0.113322	0.0194475	0.102195	0.0133889	0.14892	0.026502	0.130294	0.0296114	0.127927	0.0163315	0.0881565	0.00808872	0.122261	0.0303229	0.118425	0.0130381	0.207805	0.020692	0.274769	0.00357412	0.0785157	0.010444	0.099573	0.0167287	0.09469	0.00203795	0.118099	0.0245007	0.140182	0.0101004	0.106075	0.0122113	0.000969901	0.0460958	0.0105987	0.831459	0.298916	0.0194403	0.78984	0.474982	0.00630379	0.000108853	0.138087	0.0580206	0.0617037
TG [52:3]	0.834623	0.226483	0.857809	0.0186329	1.04842	0.058504	1.05094	0.155223	0.982405	0.0394002	0.799947	0.196358	0.40958	0.128492	0.669124	0.0591949	1.14232	0.239476	1.0108	0.0383823	1.14606	0.13208	1.04519	0.079252	0.315363	0.040821	0.803495	0.0420878	1.08933	0.217414	1.02848	0.0259268	1.1872	0.0903553	0.795802	0.114653	0.868313	0.188573	0.244106	0.327909	0.85097	0.0336115	0.00951882	0.00148244	0.00228537	0.0018798	0.000134434	0.0037433	1.39549e-05
TG [52:2]	2.64953	0.896102	2.7743	0.0783113	2.75575	0.507303	3.57609	0.347601	4.32832	0.159236	4.13369	0.450495	1.7224	0.190363	1.95692	0.171196	2.80555	0.294189	2.84096	0.276921	4.068	0.271178	4.25594	0.170544	1.35244	0.255036	1.95641	0.151461	2.89126	0.523819	3.10657	0.18602	4.55237	0.567845	4.49552	0.975006	0.82195	0.866879	0.170301	0.0330633	0.0624373	0.187789	0.00586995	0.00449156	0.000254032	6.75115e-05	0.0243021	0.0102234	0.000651576
TG [52:1]	1.14731	0.374998	0.908785	0.0682782	0.939754	0.194615	1.34686	0.191217	2.16567	0.109511	2.20861	0.259337	0.931787	0.075494	0.750115	0.0615984	1.09361	0.106515	1.25951	0.116512	2.76756	0.0885202	3.87374	0.369252	0.640636	0.134992	0.665891	0.0488028	0.918303	0.143662	1.07978	0.0779364	1.91202	0.265903	1.81722	0.320569	0.339383	0.442768	0.4577	0.0106986	0.0157108	0.0319918	0.0983289	0.0149916	1.06584e-05	0.0001732	0.775759	0.0712363	0.00816268
TG [52:0]	0.1286	0.00860271	0.0752946	0.00410238	0.0835766	0.0169055	0.101608	0.0187447	0.150454	0.040355	0.12165	0.0136186	0.127603	0.013349	0.101459	0.0117578	0.138718	0.017312	0.161739	0.0208502	0.314173	0.0224589	0.409213	0.0304616	0.0823715	0.0246219	0.0920376	0.0145142	0.0923757	0.011576	0.119616	0.0133466	0.16038	0.0248978	0.123249	0.0177386	0.000635466	0.0147176	0.0860318	0.410868	0.496385	0.0636023	0.428254	0.0753171	0.000245574	0.000125768	0.589486	0.558829	0.082633
TG [54:3]	5.844	1.92709	11.4956	0.117241	10.8092	2.68815	15.0362	1.2292	14.933	0.720598	12.3156	0.951887	5.16397	0.335349	10.9955	1.20947	14.4677	2.00962	16.2447	2.18334	22.3492	2.2527	22.7696	0.93778	4.59833	1.15041	9.14337	1.67379	15.009	1.01525	15.7118	1.29452	18.6899	3.39077	16.476	4.03381	0.00712907	0.0600399	0.00223311	0.00156756	0.00644918	0.00129439	0.00138252	0.000965953	0.00019787	6.7787e-06	0.0179017	0.000299915	0.000372776
TG [54:2]	5.59569	2.16232	5.87169	0.644335	5.55427	1.81582	9.47028	1.62862	12.8466	1.24596	11.5233	1.30953	6.18291	0.141938	6.98412	0.611056	11.1517	1.85999	14.8706	1.7616	31.0427	1.51452	39.2819	2.86471	4.36874	1.43975	3.79246	0.825096	6.55422	0.818962	8.19749	1.15789	13.5335	3.36688	11.6361	2.70247	0.842565	0.980947	0.0682774	0.00732101	0.0153314	0.0914073	0.00992871	0.00104378	9.26849e-06	3.69735e-05	0.579928	0.0842901	0.022976
TG [54:1]	0.977387	0.373703	1.00125	0.0938345	1.20749	0.311793	2.13711	0.337096	3.28334	0.173118	3.12106	0.262988	1.13134	0.0366469	1.2395	0.367683	2.63046	0.18983	4.2394	0.443593	19.6575	1.011	29.1635	2.66329	0.912732	0.43928	0.769955	0.16681	1.41405	0.166588	1.78189	0.091853	2.85306	0.43677	2.1018	0.282429	0.919738	0.458827	0.016248	0.000632857	0.00124789	0.638819	0.000177795	0.000268076	5.88899e-06	5.32668e-05	0.626517	0.138275	0.02845
TG [56:3]	0.199221	0.0485583	0.241804	0.0214439	0.223095	0.0370476	0.294837	0.0173109	0.284835	0.00835816	0.243433	0.0179413	0.179422	0.0052793	0.203267	0.0448656	0.279084	0.027998	0.302783	0.0397037	0.407967	0.034122	0.435284	0.0193101	0.158705	0.0167278	0.205968	0.0333216	0.285558	0.0255392	0.288196	0.0300025	0.373529	0.0195111	0.339358	0.064211	0.23704	0.535516	0.0325098	0.0395671	0.213158	0.41233	0.00374643	0.00594695	0.000330367	2.46461e-05	0.0931089	0.00197551	0.00284223
TG [56:2]	0.264797	0.0617741	0.265282	0.0153626	0.271971	0.0468971	0.381251	0.0231831	0.451467	0.0120402	0.409779	0.0360419	0.243976	0.00251797	0.274886	0.0442617	0.433669	0.0538076	0.538751	0.0611052	1.13147	0.078917	1.52416	0.0820593	0.201413	0.0300616	0.2304	0.0221354	0.315648	0.013486	0.3651	0.0487849	0.503659	0.0267208	0.428942	0.0619877	0.990099	0.880476	0.0377694	0.0068042	0.0246463	0.29371	0.00365511	0.00112536	4.10409e-05	1.11734e-05	0.249859	0.00387008	0.00777443
TG [56:1]	0.135211	0.0099917	0.100322	0.00700697	0.141143	0.0164354	0.174832	0.0290349	0.244534	0.013546	0.223576	0.0292873	0.110752	0.0168048	0.139059	0.0270166	0.221777	0.0284166	0.297004	0.0270116	0.746048	0.0387828	1.10446	0.107304	0.0933038	0.0291874	0.131208	0.0298915	0.134096	0.00412024	0.161324	0.0209615	0.23137	0.00639836	0.180108	0.013863	0.00775139	0.621559	0.089125	0.000355717	0.00778367	0.198169	0.00432664	0.000532407	1.29346e-05	9.26707e-05	0.191177	0.0746012	0.0305413
TG [58:3]	0.0804941	0.0191463	0.0715127	0.0029069	0.070374	0.010121	0.0773409	0.0111593	0.0768109	0.0082689	0.0608327	0.0150981	0.0732974	0.00506876	0.0747356	0.00316504	0.0953872	0.0147274	0.0894065	0.00994221	0.124125	0.00703398	0.131892	0.00696231	0.0481963	0.0243229	0.0657781	0.00509626	0.0768348	0.0182146	0.0846495	0.00590591	0.0964881	0.00396533	0.0798671	0.0171193	0.46683	0.463693	0.817467	0.774951	0.23503	0.698165	0.0699544	0.0667507	0.000529685	0.000296698	0.287642	0.177936	0.0651791
TG [58:2]	0.181648	0.0440109	0.206266	0.0171306	0.214802	0.0461954	0.291174	0.0373678	0.342554	0.0167634	0.304375	0.0317532	0.179983	0.00689179	0.222585	0.0446645	0.357355	0.0454917	0.459723	0.059738	0.940408	0.0833394	1.25626	0.0559213	0.148111	0.0430453	0.179384	0.0135384	0.253918	0.019505	0.280462	0.0244986	0.383873	0.0577513	0.326652	0.0543194	0.417646	0.419003	0.0303347	0.00408381	0.0172928	0.177856	0.00261518	0.00128838	9.49342e-05	4.97702e-06	0.296215	0.0178726	0.00981873
TG [58:1]	0.151576	0.0261008	0.137949	0.016745	0.172714	0.0321906	0.257635	0.0439973	0.401003	0.0309833	0.39496	0.0375204	0.147277	0.012293	0.175495	0.0209769	0.308231	0.0367905	0.427376	0.0462921	1.02899	0.0871407	1.45628	0.184826	0.12148	0.048722	0.143198	0.00933602	0.186472	0.0105606	0.221041	0.0186003	0.378795	0.0561407	0.346923	0.0522581	0.488989	0.426907	0.0229432	0.000437953	0.00076796	0.114772	0.00198565	0.000534773	6.47201e-05	0.000255831	0.490515	0.0868723	0.0297492
TG [60:3]	0.130278	0.0374503	0.133283	0.0103434	0.115961	0.0231261	0.149388	0.0152084	0.152901	0.00970131	0.133057	0.0154871	0.134974	0.00440156	0.131524	0.0267161	0.186455	0.0252544	0.195004	0.0300988	0.283312	0.0323394	0.304237	0.020984	0.103915	0.0334971	0.116289	0.0131835	0.159723	0.0103909	0.159594	0.0142608	0.209826	0.0250983	0.186101	0.0354105	0.899902	0.603254	0.458851	0.368415	0.911185	0.836141	0.0253907	0.0268267	0.00140747	0.000165683	0.583635	0.0510516	0.0570444
TG [60:2]	0.498302	0.172984	0.595649	0.0581304	0.587981	0.157275	0.987129	0.177711	1.43192	0.175405	1.35529	0.106857	0.576689	0.0448889	0.760617	0.260698	1.43177	0.277513	2.03446	0.313394	4.31164	0.491387	5.92148	0.459749	0.519471	0.199561	0.489084	0.100692	0.830317	0.100388	1.00731	0.105645	1.75241	0.378144	1.58604	0.300406	0.40781	0.542782	0.0269284	0.00278676	0.00187208	0.294869	0.00621912	0.00133953	0.000195445	3.65877e-05	0.825414	0.0735424	0.0200844
TG [60:1]	0.13847	0.0396392	0.149489	0.0183429	0.193129	0.0451868	0.354999	0.0724953	0.606793	0.0925369	0.585128	0.0419665	0.170961	0.0116983	0.266794	0.0809538	0.627402	0.115643	1.06035	0.14482	2.69317	0.546027	3.44088	0.607071	0.199637	0.123068	0.145759	0.0304827	0.256231	0.0274235	0.33629	0.022243	0.594824	0.131204	0.492436	0.0776952	0.684679	0.190375	0.0105046	0.00128822	0.000179302	0.112298	0.00244099	0.00044789	0.00132461	0.000735321	0.502541	0.480316	0.131358
TG [62:2]	0.0414384	0.0131079	0.0390421	0.00727146	0.044937	0.0112115	0.0657169	0.0121406	0.0842217	0.0045172	0.0824331	0.00371027	0.0362474	0.00821558	0.0545447	0.0123329	0.090005	0.0106617	0.117417	0.0155252	0.212443	0.016239	0.285364	0.0223829	0.0374423	0.00917131	0.0528566	0.0233531	0.0521036	0.00544945	0.0699359	0.00870513	0.106159	0.00942725	0.0904771	0.0115081	0.795582	0.743076	0.0782023	0.0059061	0.00646194	0.0992412	0.00229141	0.00132141	7.41115e-05	5.48217e-05	0.347245	0.0759592	0.0112391
TG [62:1]	0.0059795	0.00207493	0.00596865	0.00364678	0.0113311	0.00329756	0.0211485	0.00745071	0.0426142	0.00912033	0.0448518	0.0030774	0.00676202	0.00341468	0.0165309	0.00587653	0.0462308	0.00793288	0.0714556	0.00780004	0.156738	0.0290841	0.198888	0.0346243	0.0119513	0.00213023	0.00968663	0.000267658	0.0145671	0.00189353	0.0185746	0.00456426	0.0413481	0.00844029	0.0360427	0.00545405	0.996638	0.0760594	0.0273518	0.00246482	5.43038e-05	0.0675199	0.00137851	0.00019258	0.000892091	0.000667562	0.141725	0.187112	0.0850118
TG [64:2]	0.00996612	0.00529002	0.0164453	0.00714178	0.0189226	0.00613428	0.0290734	0.0139565	0.0488435	0.00623604	0.043116	0.00650894	0.00723426	0.00249739	0.0310572	0.00738978	0.0615004	0.00955759	0.0796725	0.00939717	0.14377	0.0106751	0.194695	0.011952	0.00965215	0.00877712	0.0147749	0.00655846	0.0222986	0.013942	0.0337293	0.00935128	0.054537	0.0127516	0.0534343	0.00789942	0.275294	0.127985	0.0908798	0.00118598	0.00238301	0.00612927	0.000681135	0.000208023	2.73204e-05	1.18868e-05	0.463477	0.254419	0.0313271
TG [64:1]	0.000120655	0.000208981	0	0	0	0	0	0	0.0113048	0.00510421	0.0148201	0.00403466	0.000303678	0.000525985	0.000367029	0.000635713	0.0118703	0.00337347	0.0301599	0.00228217	0.0742623	0.0261142	0.0910077	0.0201712	0.00155258	0.00186471	0.00011036	0.00019115	0	0	0	0	0.00629931	0.00583984	0.00342447	0.00116896	0.373901	0.373901	0.373901	0.0192355	0.00324082	0.900626	0.00421234	2.49001e-05	0.00801869	0.00146761	0.253497	0.222726	0.222726
TG [66:2]	0.00216299	0.00187949	0.0129591	0.00582641	0.00845723	0.00416715	0.0130274	0.00553246	0.0225693	0.0037143	0.0229104	0.00216582	0.00314691	0.00157656	0.0176164	0.00336628	0.0375502	0.00980745	0.0493086	0.00667572	0.0837701	0.00734613	0.106917	0.00883073	0.00465282	0.00513253	0.00711157	0.00617406	0.0106651	0.00933277	0.0127828	0.00566923	0.0268428	0.0104552	0.0348183	0.00644519	0.0378642	0.075592	0.0322632	0.00105497	0.000233304	0.00252232	0.00388539	0.000309671	4.93265e-05	3.66174e-05	0.623898	0.383578	0.13938
TG [66:1]	0.000823691	0.00140614	0	0	0.00060384	0.000707742	0.0033541	0.00380078	0.0155957	0.00684521	0.0202933	0.00148695	0.00120352	0.00105835	0.000588615	0.00101951	0.00971062	0.00188636	0.027481	0.00488297	0.0687428	0.0236889	0.0922909	0.0195887	0.00481438	0.00486076	0	0	0.000206386	0.00035747	0.00188885	0.0016482	0.0148897	0.00643482	0.0164321	0.00451785	0.367676	0.820757	0.340323	0.021555	7.9424e-05	0.508725	0.00242682	0.000805518	0.00785419	0.0012976	0.161393	0.176855	0.37941
TG	27.3411	6.96389	31.2368	0.96094	32.3592	6.136	42.5728	4.42557	50.4015	2.44904	44.7877	5.353	22.7367	1.82087	30.387	2.80512	45.6372	4.91262	53.4089	5.31181	102.985	7.13088	127.035	6.66094	18.1784	4.27897	26.0483	2.43425	38.4038	4.00879	41.9696	2.92547	56.4824	7.8625	47.8317	9.71438	0.391499	0.402067	0.0329835	0.00565175	0.0262853	0.0166468	0.00163191	0.000696193	4.62934e-05	1.26861e-05	0.0503878	0.00394346	0.00135592
EE [18:1]	40.7319	16.4883	45.7136	3.39987	45.6586	5.11839	42.7956	5.37418	37.195	4.22712	32.8408	3.23505	36.9154	5.7314	42.5206	8.11736	43.5669	8.50233	45.765	8.57501	57.8917	7.00744	56.7596	2.67014	36.3853	14.1534	40.2386	9.49234	48.2963	4.45742	41.3977	11.6386	47.3885	10.3897	40.8016	12.6446	0.635286	0.647032	0.84677	0.737119	0.461618	0.383879	0.324063	0.211435	0.0159522	0.00555766	0.715301	0.236796	0.660357
EE	40.7319	16.4883	45.7136	3.39987	45.6586	5.11839	42.7956	5.37418	37.195	4.22712	32.8408	3.23505	36.9154	5.7314	42.5206	8.11736	43.5669	8.50233	45.765	8.57501	57.8917	7.00744	56.7596	2.67014	36.3853	14.1534	40.2386	9.49234	48.2963	4.45742	41.3977	11.6386	47.3885	10.3897	40.8016	12.6446	0.635286	0.647032	0.84677	0.737119	0.461618	0.383879	0.324063	0.211435	0.0159522	0.00555766	0.715301	0.236796	0.660357
Lipid classes
LPC	3.25753	1.03981	2.08666	0.315548	1.23081	0.251191	0.977721	0.144269	0.700125	0.261601	0.510181	0.130106	2.26615	0.151474	2.18949	0.424175	1.69965	0.23186	1.31565	0.261208	0.699141	0.0538962	0.43171	0.0510152	2.73083	0.403415	2.19814	0.284477	1.57767	0.386709	1.16867	0.182844	0.976761	0.0894518	0.830381	0.209317	0.135406	0.0304548	0.0197484	0.0144793	0.0104894	0.782807	0.0239517	0.00549825	7.2181e-05	3.77815e-05	0.13497	0.0232886	0.0036344
PC	63.1854	15.2209	54.9328	2.32576	50.2354	5.6161	50.9885	5.90373	44.9148	2.38631	42.1019	10.2154	59.9837	4.03112	52.5078	6.44029	54.5646	2.97594	53.6357	0.870414	62.858	3.54746	68.5522	4.00124	56.6682	6.98397	54.6946	5.55456	59.6224	7.30155	55.71	6.91329	58.1917	6.07898	54.3841	11.2046	0.405785	0.238985	0.265319	0.109192	0.117167	0.163538	0.134322	0.0560331	0.406343	0.0592358	0.721154	0.639193	0.874088
LPE	2.13727	0.253893	0.959546	0.135114	0.568053	0.0542869	0.415062	0.0440207	0.364737	0.0351534	0.328993	0.018048	1.69766	0.156101	1.2227	0.089209	0.72539	0.0820143	0.517233	0.0709892	0.318324	0.0402361	0.253277	0.00826546	2.09665	0.285	1.05463	0.0936762	0.618384	0.0968664	0.478408	0.016206	0.423672	0.0293319	0.424237	0.0394597	0.00208668	0.000470584	0.00031812	0.000278426	0.000250578	0.0102174	0.000671441	0.000283498	0.000120684	8.91269e-05	0.00384454	0.0010477	0.000603209
PE	24.1277	4.96266	17.7754	1.26517	15.7243	1.26815	13.6781	1.78191	11.9309	1.25895	10.62	2.38542	21.3206	1.80203	17.4418	1.71746	16.25	0.57689	14.4151	0.666693	14.7633	2.21682	13.3622	1.61395	20.9313	2.24336	17.9569	1.76052	17.2685	1.65534	15.39	1.14664	15.8526	1.76969	13.3393	2.51204	0.0981626	0.0467902	0.026474	0.014539	0.0131681	0.0541611	0.0097221	0.00339125	0.0164622	0.00468747	0.14512	0.0852052	0.018948
DMPE	2.8075	0.85661	1.29398	0.171503	0.915751	0.0991813	0.61715	0.112802	0.438551	0.0516102	0.525378	0.139769	2.83055	0.665618	1.28554	0.277894	0.857825	0.093187	0.668536	0.0518173	0.502908	0.0757445	0.460632	0.0672438	3.65471	1.04518	1.53258	0.387756	1.17312	0.162191	0.880718	0.140495	1.00899	0.180947	1.05498	0.251503	0.0399122	0.0191087	0.011774	0.0087672	0.0103846	0.0206537	0.00706205	0.00496335	0.00383996	0.00357646	0.0300131	0.0153007	0.01037
MMPE	1.04341	0.289425	0.517248	0.0255361	0.392543	0.0229553	0.281101	0.0569839	0.203909	0.026291	0.236028	0.0706526	1.05337	0.25397	0.512268	0.0856313	0.438977	0.0165483	0.367589	0.0263861	0.351725	0.0913781	0.306467	0.0415066	1.19943	0.224514	0.616921	0.121471	0.549765	0.0772007	0.429997	0.069981	0.4994	0.106368	0.476466	0.0941143	0.0349619	0.0177976	0.0110231	0.00747268	0.0093506	0.0249669	0.0139042	0.0096474	0.010801	0.0073483	0.0167833	0.00903997	0.00478145
LPI	1.40931	0.242542	0.913476	0.116948	0.641439	0.162821	0.495828	0.065972	0.401597	0.0553488	0.291033	0.0257072	0.948373	0.148456	1.00464	0.195302	0.729616	0.167332	0.601208	0.165182	0.442722	0.140015	0.281168	0.0678225	1.16543	0.0587952	0.992222	0.0816188	0.737957	0.0142751	0.69741	0.0872951	0.638898	0.0276459	0.694774	0.0320469	0.0332329	0.0103954	0.00325461	0.00217349	0.00136142	0.711442	0.16555	0.0536771	0.0127281	0.0021002	0.0406386	0.000256027	0.00152901
PI	75.9164	13.475	66.6039	4.64292	59.9272	5.74271	55.9602	7.2744	47.2872	5.65061	39.7734	6.68136	64.4884	4.20811	65.0319	5.91758	63.8368	2.4962	59.2773	2.9281	67.4675	7.29681	65.4353	4.26578	63.3145	10.1863	65.6868	4.45926	67.1152	8.09317	60.6767	5.42979	63.0393	6.89316	54.6179	9.49107	0.321006	0.131648	0.0869475	0.0274379	0.0141201	0.903112	0.828888	0.153109	0.573274	0.797868	0.730479	0.639476	0.712445
LPS	0.783198	0.141401	0.563225	0.193027	0.379261	0.172989	0.226964	0.0539746	0.152273	0.0285643	0.115539	0.0155389	0.597199	0.23545	0.671782	0.155042	0.499492	0.222616	0.32556	0.110095	0.172846	0.034989	0.121872	0.029731	0.507843	0.179339	0.43019	0.104279	0.259714	0.0782724	0.186877	0.0508123	0.129419	0.0169871	0.112178	0.0214109	0.186531	0.0351378	0.00312291	0.00162821	0.0012455	0.670574	0.629066	0.144521	0.0366534	0.025604	0.552104	0.093031	0.0406391
PS	15.0663	2.64186	13.8342	1.12583	13.4696	1.25916	12.0219	1.57579	9.3046	1.49215	6.61652	0.871356	13.0739	1.53919	13.9941	1.70853	11.8841	0.711119	10.2588	0.760991	11.8938	0.775307	11.6286	0.23336	11.3278	2.2437	12.2515	1.43647	13.8736	2.71397	11.9263	1.53539	10.794	0.998427	7.67951	1.37976	0.498682	0.398182	0.161648	0.0302413	0.0062501	0.526411	0.291002	0.0468797	0.301227	0.183107	0.580517	0.278711	0.722368
PG	0.0484402	0.036813	0.0139172	0.00543795	0.0110133	0.00306661	0.00920161	0.00594344	0.00960344	0.00638341	0.00963191	0.00695565	0.0450693	0.0197583	0.0164737	0.010525	0.00486796	0.003368	0.00695997	0.00343694	0.016269	0.0082396	0.0251091	0.00561943	0.0404115	0.0201074	0.0105345	0.00711818	0.0104325	0.00538215	0.00544037	0.00279024	0.0108945	0.00724464	0.00673269	0.0041462	0.18336	0.154139	0.14245	0.14617	0.147232	0.0913793	0.0254903	0.0301783	0.0802357	0.167662	0.0722872	0.0671553	0.0405853
LPA	0.0416366	0.0308027	0.0381797	0.00928234	0.00840732	0.00101791	0.00671239	0.00291369	0.00793704	0.00674002	0.00671614	0.00671409	0.03217	0.0146603	0.0514935	0.00953656	0.0340963	0.00609834	0.0203211	0.00844393	0.0160098	0.0080532	0.00953881	0.00307476	0.0323156	0.0237018	0.0356416	0.00711057	0.0208019	0.00938816	0.0148421	0.00759462	0.0135366	0.00683648	0.00854855	0.00448984	0.861408	0.135225	0.122243	0.137807	0.127485	0.128197	0.843842	0.291838	0.169561	0.0589943	0.827342	0.477781	0.290834
PA	1.12749	0.213465	1.01328	0.0550295	1.01643	0.00956414	1.02829	0.127753	1.18055	0.135831	1.17728	0.105629	1.27195	0.090591	0.937396	0.0463163	0.969154	0.0458608	0.878642	0.075884	1.11424	0.22802	1.11	0.178302	1.24287	0.226108	1.21959	0.0354469	1.34694	0.0203893	1.31518	0.0736432	1.54512	0.0182619	1.22681	0.274243	0.420241	0.418884	0.527742	0.734809	0.735629	0.00469598	0.00667455	0.0044938	0.327979	0.2334	0.86875	0.471638	0.62625
CL	3.48744	0.865937	2.68655	0.103046	2.36375	0.0688509	2.56084	0.364814	2.55016	0.252156	2.02188	0.481379	3.0058	0.471562	2.88349	0.321873	2.92554	0.157796	2.58811	0.136458	3.22644	0.658048	3.02828	0.371066	2.60541	0.554326	2.68862	0.300191	3.04931	0.509426	2.74495	0.217197	3.22677	0.223457	2.45361	0.518451	0.186882	0.0885706	0.162824	0.146241	0.0624971	0.729417	0.793671	0.21456	0.661485	0.95137	0.830368	0.364868	0.705538
LCL	0.192157	0.0475332	0.0940985	0.0479859	0.0237943	0.0161839	0.0117385	0.00603574	0.0117528	0.00447491	0.00786488	0.00323651	0.0997293	0.015702	0.119178	0.0166279	0.0492156	0.019851	0.0206133	0.0113032	0.0214048	0.00868178	0.0207512	0.00594484	0.10011	0.0271374	0.0618688	0.0159274	0.0166831	0.010985	0.00804599	0.00396345	0.0111805	0.00270719	0.00559144	0.00352686	0.0657358	0.00437393	0.00285424	0.00281732	0.00258222	0.214755	0.0258938	0.00209754	0.00163988	0.00123496	0.103069	0.00784066	0.00435525
Sph	1.17874	0.224974	1.93428	0.127486	1.23165	0.0580008	0.944063	0.0415604	0.431345	0.0515105	0.38906	0.104613	1.26113	0.407233	1.90346	0.240332	1.64017	0.0904852	1.13836	0.0998042	0.671057	0.0582738	0.599855	0.0142115	0.965637	0.0634637	1.96663	0.02548	1.53574	0.010882	1.07493	0.0985293	0.699882	0.0927403	0.548944	0.161478	0.00717677	0.713362	0.150267	0.00496336	0.00528367	0.0782759	0.19066	0.638724	0.0678888	0.048275	1.4375e-05	0.000105473	0.181572
Cer	8.12138	1.27318	9.55157	0.487842	10.078	0.52227	10.049	0.96712	8.09768	1.02694	5.79056	1.04021	6.8969	0.818888	8.94842	1.10508	11.2996	0.0277472	11.5051	0.500429	15.6946	2.44554	15.1378	1.62742	6.17565	0.877141	9.4254	0.814944	12.1237	2.20677	10.648	1.13247	9.71622	0.805695	7.28786	1.33096	0.143402	0.069495	0.105048	0.981188	0.0700284	0.0611042	0.000741717	0.00114176	0.00410715	0.00143313	0.00930003	0.012269	0.00566252
IPC	1.05556	0.159344	1.0382	0.0290674	1.06489	0.110658	1.27322	0.200255	1.16593	0.110807	0.846619	0.190189	0.973691	0.104532	1.11743	0.154978	1.29525	0.0236207	1.21711	0.0586977	1.63705	0.296184	1.70024	0.266105	0.775423	0.177928	1.09783	0.0610494	1.45518	0.290178	1.46098	0.144038	1.65665	0.208819	1.23617	0.244016	0.861813	0.937611	0.214704	0.38038	0.218446	0.253736	0.0065291	0.0245213	0.021616	0.0116766	0.0411991	0.0258423	0.00657463
MIPC	11.9263	1.84449	9.75041	0.0560735	8.35567	0.811116	9.48888	1.64494	8.44628	1.1802	6.56101	1.57126	9.92811	0.911188	9.72258	1.08061	9.63593	0.388701	8.36119	0.349683	9.43874	1.56105	8.77073	1.15043	8.37765	2.61896	9.96189	0.976127	11.508	2.92475	10.5757	1.25989	11.2469	1.84196	8.74325	2.13366	0.110652	0.0373179	0.162779	0.0512355	0.0185341	0.813572	0.636361	0.0497797	0.663531	0.243712	0.381802	0.239409	0.260362
DG	9.81319	1.88017	6.86622	0.0607792	6.22041	0.532044	6.23604	0.977769	6.57972	1.24872	5.414	1.4685	8.69135	0.240733	9.25496	1.25044	11.2398	0.464355	11.624	0.63222	13.6465	0.880461	13.3091	1.27394	8.4601	0.82526	7.83386	0.573741	7.39248	0.659024	6.87917	0.799966	7.07562	0.807161	5.53411	0.994228	0.0533494	0.033385	0.0430865	0.0681131	0.0330933	0.486057	0.0010799	0.00168374	0.000712989	0.0035055	0.341237	0.154847	0.075787
TG	27.3411	6.96389	31.2368	0.96094	32.3592	6.136	42.5728	4.42557	50.4015	2.44904	44.7877	5.353	22.7367	1.82087	30.387	2.80512	45.6372	4.91262	53.4089	5.31181	102.985	7.13088	127.035	6.66094	18.1784	4.27897	26.0483	2.43425	38.4038	4.00879	41.9696	2.92547	56.4824	7.8625	47.8317	9.71438	0.391499	0.402067	0.0329835	0.00565175	0.0262853	0.0166468	0.00163191	0.000696193	4.62934e-05	1.26861e-05	0.0503878	0.00394346	0.00135592
EE	40.7319	16.4883	45.7136	3.39987	45.6586	5.11839	42.7956	5.37418	37.195	4.22712	32.8408	3.23505	36.9154	5.7314	42.5206	8.11736	43.5669	8.50233	45.765	8.57501	57.8917	7.00744	56.7596	2.67014	36.3853	14.1534	40.2386	9.49234	48.2963	4.45742	41.3977	11.6386	47.3885	10.3897	40.8016	12.6446	0.635286	0.647032	0.84677	0.737119	0.461618	0.383879	0.324063	0.211435	0.0159522	0.00555766	0.715301	0.236796	0.660357
Sum PL	215.734	42.583	183.667	8.02081	166.406	6.18964	160.09	19.7933	137.169	13.035	117.541	22.1922	190.513	14.1352	179.658	17.7556	177.7	2.25736	165.981	4.09633	190.635	17.1233	190.636	5.60941	182.947	24.4665	181.916	14.6005	192.327	20.7688	174.318	14.7288	178.982	17.3417	154.582	29.2243	0.269165	0.118051	0.109389	0.0378176	0.0239728	0.453993	0.195974	0.0446844	0.992889	0.989538	0.953042	0.63929	0.628411
sum All	294.799	66.7125	269.418	6.25467	251.876	12.2181	252.639	29.5082	231.776	11.716	200.972	30.5827	260.118	19.5877	263.724	29.5727	279.784	11.4664	277.917	12.1212	365.83	29.6344	388.339	11.698	246.936	42.3241	258.003	26.6968	287.956	28.0838	265.64	29.7123	290.628	33.4069	249.299	52.2167	0.547577	0.334566	0.373447	0.182341	0.0911752	0.868769	0.207814	0.251787	0.00672414	0.000623722	0.721157	0.234446	0.564987
Data are expressed as mean ± SD, n= 3 (independent experiments).
Student’s t-tests were performed for pairwise multiple comparisons; significance was accepted for p < 0.05 corresponding to a false discovery rate q < 0.034. Green fill indicates p < 0.05.
PC, phosphatidylcholine; PE, phosphatidylethanolamine; MMPE, monomethyl-PE; DMPE, dimethyl-PE; PI, phosphatidylinositol; PS, phosphatidylserine; PG, phosphatidylglycerol; PA, phosphatidic acid; CL, cardiolipin; LPC, LPE, LPI, LPS, LPA, LCL, the corresponding lyso lipids;
Sph, sphingoid base; Cer, ceramide; IPC, inositolphosphoceramide; MIPC, mannosyl-inositolphosphoceramide; DG, diacylglycerol; TG, triacylglycerol; EE, ergosteryl ester.
Sum formulas for glycero(phospho)lipids are defined as the lipid class abbreviation followed by the total number of carbons and total number of double bonds for all chains, e.g. PC(34:1).
Sum formulas for sphingolipids are defined as the lipid class abbreviation followed by the total number of carbons, total number of double bonds and total number of hydroxyl groups in the long chain base and the fatty acyl moiety, e.g. Cer(44:0:3).
[truncated: 14 more columns]

## Sheet: S5_Strains
Table S5. S. pombe strains used in this study
Strain	Genotype	Source/Reference
BRC1	h-; leu1-32; ura4-D18	[34]
BRC25	h+; ade6-M216; leu1-32; ura4-D18; ntp1::ura4	[71]
BRC26	h-; leu1-32; ura4-D18; tps1::ura4	[34]
BRC27	h-; leu1-32; ura4-D18; ntp1::ura4	BRC1 X BRC25

## Sheet: S6_MSquant
Table S6. Mass spectrometry quantitation details
Lipid Class	Internal standard (IS)	Ion format	Conc of infusion (fmol/μL)
PC, LPC	PC(D31-16:0/18:1)	[M+H]+	236
PE, LPE, MMPE, DMPE	PE(D31-16:0/18:1)	[M−H]−	166
PI, LPI, IPC, MIPC MIP2C	PI(D30-16:0/18:1)	[M−H]−	144.22
PS, LPS	PS(D30-16:0/18:1)	[M−H]−	79
PG	PG(D30-16:0/18:1)	[M−H]−	3
PA	PA(D30-16:0/18:1)	[M−H]−	18
CL	CL(tetra14:0)	[M−2H]2−	3
Cer	Cer(18:0:3/16:0)	[M+Cl]−	15
Sph	Cer(18:0:3/16:0)	[M+H]+	15
DG	DG(22:1/22:1)	[M+NH4]+	23
TG	TG(17:1/17:1/17:1)	[M+NH4]+	18
EE	CE(18:1)	[M+NH4]+	61
